## Neutrophils promote CXCR3-dependent itch in the development of atopic dermatitis

**Authors and Affiliations:** Carolyn M. Walsh<sup>1‡</sup>, Rose Z. Hill<sup>1‡</sup>, Jamie Schwendinger-Schreck<sup>1</sup>, Jacques Deguine<sup>1</sup>, Emily C. Brock<sup>1</sup>, Natalie Kucirek<sup>1</sup>, Ziad Rifi<sup>1</sup>, Jessica Wei<sup>2</sup>, Karsten Gronert<sup>2</sup>, Rachel B. Brem<sup>3,4</sup>, Gregory M. Barton<sup>1</sup>, Diana M. Bautista<sup>1,5</sup>

1. Department of Molecular and Cell Biology, University of California, Berkeley, CA 94720, USA.
2. Vision Science Program, School of Optometry, University of California, Berkeley, CA 94720, USA.
3. Department of Plant and Microbial Biology, University of California, Berkeley, CA 94720, USA.
4. Buck Institute for Research on Aging, Novato, CA 94945, USA.
5. Helen Wills Neuroscience Institute, University of California, Berkeley, CA 94720, USA.

‡ These authors contributed equally and order determined by coin toss.

## 1 **Abstract**

2 Chronic itch remains a highly prevalent disorder with limited treatment options. Most chronic itch  
3 diseases are thought to be driven by both the nervous and immune systems, but the  
4 fundamental molecular and cellular interactions that trigger the development of itch and the  
5 acute-to-chronic itch transition remain unknown. Here, we show that skin-infiltrating neutrophils  
6 are key initiators of itch in atopic dermatitis, the most prevalent chronic itch disorder. Neutrophil  
7 depletion significantly attenuated itch-evoked scratching in a mouse model of atopic dermatitis.  
8 Neutrophils were also required for several key hallmarks of chronic itch, including skin  
9 hyperinnervation, enhanced expression of itch signaling molecules, and upregulation of  
10 inflammatory cytokines, activity-induced genes, and markers of neuropathic itch. Finally, we  
11 demonstrate that neutrophils are required for induction of CXCL10, a ligand of the CXCR3  
12 receptor that promotes itch via activation of sensory neurons, and we find that that CXCR3  
13 antagonism attenuates chronic itch.

## 14 **Introduction**

15 Chronic itch is a debilitating disorder that affects millions of people worldwide.<sup>1-3</sup> It is a symptom  
16 of a number of skin diseases and systemic disorders, as well as a side effect of a growing list of  
17 medications. Like chronic pain, chronic itch can be a disease in and of itself.<sup>4-6</sup> Unlike acute itch,  
18 which can facilitate removal of crawling insects, parasites, or irritants, persistent scratching in  
19 chronic itch disorders has no discernable benefit; scratching damages skin, leading to  
20 secondary infection, disfiguring lesions, and exacerbation of disease severity.<sup>2,7,8</sup> The most  
21 common chronic itch disorder is atopic dermatitis (AD; commonly known as eczema), which  
22 affects fifteen million people in the United States alone.<sup>9</sup> Severe AD can trigger the atopic  
23 march, where chronic itch and inflammation progress to food allergy, allergic rhinitis, and  
24 asthma.<sup>9,10</sup>

25  
26  
27 Little is known about the underlying mechanisms that drive chronic itch pathogenesis. As such,  
28 studies of human chronic itch disorders have sought to identify candidate mechanisms of  
29 disease progression. A number of studies have identified biomarkers and disease genes in itchy  
30 human AD lesions.<sup>11-15</sup> Indeed, a recent study compared the transcriptomes of healthy skin to  
31 itchy and non-itchy skin from psoriasis and AD patients, revealing dramatic changes in  
32 expression of genes associated with cytokines, immune cells, epithelial cells, and sensory  
33 neurons.<sup>16</sup> However, due to the difficulty in staging lesion development and obtaining staged  
34 samples from patients, there is currently no temporal map of when individual molecules and cell  
35 types contribute to chronic itch pathogenesis. Furthermore, the use of human patient data does  
36 not allow for rigorous mechanistic study of how disease genes contribute to chronic itch. To this  
37 end, we used a well-characterized inducible animal model of itch to define where, when, and  
38 how these genes identified from patient data contribute to chronic itch pathogenesis.

39  
40 We employed the MC903 mouse model of AD and the atopic march<sup>17-21</sup> to provide a framework  
41 within which to identify the molecules and cells that initiate the development of atopic itch. The  
42 MC903 model is ideal for our approach because of its highly reproducible phenotypes that  
43 closely resemble human AD and the ability to induce the development of lesions and  
44 scratching.<sup>18-20,22-24</sup> By contrast, it is difficult to synchronously time the development of lesions in  
45 commonly used genetic models of AD, such as filaggrin mutant mice or Nc/Nga mice. Another  
46 advantage of the MC903 model is that it displays collectively more hallmarks of human AD than  
47 any one particular genetic mouse model. For example, the commonly used IL-31<sup>tg</sup>  
48 overexpressor model<sup>25,26</sup> lacks strong Th2 induction,<sup>27</sup> and itch behaviors have not yet been  
49 rigorously characterized in the keratinocyte-TSLP overexpressor model. As MC903 is widely  
50 used to study the chronic phase of AD, we hypothesized that MC903 could also be used to

51 define the early mechanisms underlying the development of chronic itch, beginning with healthy  
52 skin. We performed RNA-seq of skin at key time points in the model. We complemented this  
53 approach with measurements of itch behavior and immune cell infiltration. The primary goal of  
54 our study was to identify the inciting molecules and cell types driving development of chronic  
55 itch. To that end, we show that infiltration of neutrophils into skin is required for development of  
56 chronic itch. Additionally, we demonstrate that neutrophils direct early hyperinnervation of skin,  
57 and the upregulation of itch signaling molecules and activity-induced genes in sensory neurons.  
58 Finally, we identify CXCL10/CXCR3 signaling as a key link between infiltrating neutrophils and  
59 sensory neurons that drives itch behaviors.

### 60 61 **MC903 triggers rapid changes in expression of skin barrier, epithelial cell-derived** 62 **cytokine, and axon guidance genes**

63 Although a variety of AD- and chronic itch-associated genes have been identified, when and  
64 how they contribute to disease pathogenesis is unclear. Using RNA-seq of MC903-treated skin,  
65 we observed distinct temporal patterns by which these classes of genes are differentially  
66 expressed across the first eight days of the model (Figure 1A-B, Figure 1-Figure Supplement  
67 1A). Overall, we found that 62% of genes from a recent study of human chronic itch lesions<sup>16</sup>  
68 (Figure 1-Figure Supplement 1A) and 67% of AD-related genes (Figure 1B) were significantly  
69 changed for at least one of the time points examined, suggesting that the MC903 mouse model  
70 recapitulates many key transcriptional changes occurring in human chronic itch and AD. MC903  
71 dramatically alters the transcriptional profile of keratinocytes by derepressing genomic loci  
72 under the control of the Vitamin D Receptor. In line with rapid changes in transcription,  
73 proteases (*Klk6*, *Klk13*, among others) and skin barrier genes (*Cdhr1*) changed as early as six  
74 hours after the first treatment, before mice begin scratching (Figure 1B). Increased protease  
75 activity in AD skin is thought to promote breakdown of the epidermal barrier and release of  
76 inflammatory cytokines from keratinocytes.<sup>28,29</sup> One such cytokine, thymic stromal lymphopoietin  
77 (TSLP) is a key inducer of the Type 2 immune response, which is characteristic of human AD  
78 and the MC903 model, via signaling in CD4<sup>+</sup> T cells, basophils, and other immune cells.<sup>19,20,30-33</sup>  
79 Beginning at day two, before any significant itch-evoked scratching (Figure 1C), immune cell  
80 infiltration (Figure 1E-G, Figure 1-Figure Supplements 3A, 4A, 5A-C), or skin lesions (data not  
81 shown)<sup>23</sup> were observed, we saw increases in *Tslp*, as well as several other epithelial-derived  
82 cytokines, including the neutrophil chemoattractant genes *Cxcl1*, *Cxcl2*, *Cxcl3*, and *Cxcl5*  
83 (Figure 1D). To ask whether upregulation of these chemokine genes was dependent on  
84 protease activity, we treated human keratinocytes with the Protease Activated Receptor 2  
85 agonist SLIGRL. SLIGRL treatment triggered increased expression of several of these  
86 chemokine genes, including *IL8*, the human ortholog of mouse *Cxcl1/Cxcl2*, and *CXCL2* (Figure  
87 1-Figure Supplement 6A). These increases occurred after a few hours of exposure to SLIGRL,  
88 suggesting that increased protease activity can rapidly trigger increases in neutrophil  
89 chemoattractants in skin, similar to what we observe in MC903-treated mouse skin.

90  
91 Unexpectedly, in the skin we observed early changes in a number of transcripts encoding  
92 neuronal outgrowth factors (*Ngf*, *Artn*) and axon pathfinding molecules (*Slit1*, *Sema3d*,  
93 *Sema3a*), some of which are directly implicated in chronic itch<sup>34-38</sup>; Figure 1-Figure Supplement  
94 7A), prior to when mice began scratching. We thus used immunohistochemistry (IHC) of whole-  
95 mount skin to examine innervation at this time point. We saw increased innervation of lesions at  
96 day two but not day one of the model (Figure 1H-I, Figure 1-Figure Supplement 8A). Our RNA-  
97 seq data showed elevation in skin CGRP transcript, along with other markers of peptidergic  
98 nerve endings, specifically at day 2. Indeed, we saw an increase in CGRP<sup>+</sup> innervation of skin at  
99 day 2 (Figure 1J, Figure 1-Figure Supplement 9A), which suggests that elevation of neuronal  
100 transcripts in skin is due to hyperinnervation of peptidergic itch and/or pain fibers. The increased  
101 innervation was surprising because such changes had previously only been reported in mature

102 lesions from human chronic itch patients.<sup>16,39–44</sup> Our findings suggest that early hyperinnervation  
103 is promoted by local signaling in the skin and is independent of the itch-scratch cycle.

104

### 105 **Neutrophils are the first immune cells to infiltrate AD skin**

106 By day five, mice exhibited robust itch behaviors (Figure 1C) and stark changes in a number of  
107 AD disease genes (Figure 1A-B). For example, loss-of-function mutations in filaggrin (*FLG*) are  
108 a major risk factor for human eczema.<sup>45,46</sup> Interestingly, *Flg2* levels sharply decreased at day  
109 five. In parallel, we saw continued and significant elevation in neutrophil and basophil  
110 chemoattractant genes (*Cxcl1,2,3,5*, and *Tsfp*, Figure 1D). Using flow cytometry, we observed a  
111 number of infiltrating immune cells in the skin at day 5. Of these, we neutrophils were the most  
112 abundant immune cell subtype (Figure 1E, Figure 1-Figure Supplement 3A). It was not until day  
113 eight that we observed the classical AD-associated immune signature in the skin,<sup>47</sup> with  
114 upregulation of *Il4*, *Il33* and other Th2-associated genes (Figure 1B, Figure 1D). We also  
115 observed increases in the T cell chemoattractant genes *Cxcl9*, *Cxcl10*, and *Cxcl11* (Figure 1D),  
116 which are thought to be hallmarks of chronic AD lesions in humans.<sup>48,49</sup> Neutrophils and a  
117 number of other immune cells that started to infiltrate on day five were robustly elevated in skin  
118 by day eight, including basophils (Figure 1F), CD4<sup>+</sup> T cells (Figure 1G, Figure 1-Figure  
119 Supplement 4A), eosinophils (Figure 1-Figure Supplement 5C), and mast cells (Figure 1-Figure  
120 Supplement 5B), but not inflammatory monocytes (Figure 1-Figure Supplement 5A).

121

122 CD4<sup>+</sup> T cells are ubiquitous in mature human AD lesions<sup>50</sup> and promote chronic AD itch and  
123 inflammation. More specifically, they play a key role in IL4R $\alpha$ -dependent sensitization of  
124 pruriceptors in the second week of the MC903 model.<sup>22</sup> Thus, we were quite surprised to find  
125 that itch behaviors preceded significant CD4<sup>+</sup> T cell infiltration. Therefore, neutrophils drew our  
126 attention as potential early mediators of MC903 itch. While neutrophil infiltration is a hallmark of  
127 acute inflammation, it remains unclear whether neutrophils contribute to the pathogenesis of  
128 chronic itch. Moreover, neutrophils release known pruritogens, including proteases, reactive  
129 oxygen species, and/or histamine, inflammatory lipids, and cytokines that sensitize and/or  
130 activate pruriceptors.<sup>51,52</sup> Increased levels of the prostaglandin PGE<sub>2</sub> and the neutrophil-specific  
131 leukotriene LTB<sub>4</sub> have also been reported in skin of AD patients.<sup>53</sup> Indeed, by mass  
132 spectrometry, we observed increases in several of these inflammatory lipids, PGD<sub>2</sub> and PGE<sub>2</sub>,  
133 as well as LTB<sub>4</sub> and its precursor 5-HETE (Figure 1-Figure Supplement 10A) in MC903-treated  
134 skin, implicating neutrophils in driving AD itch and inflammation. Thus, we next tested the  
135 requirement of neutrophils to itch in the MC903 model.

136

### 137 **Neutrophils are required for early itch behaviors in the MC903 model of AD**

138 We first asked whether neutrophils, the most abundant population of infiltrating immune cells in  
139 this chronic itch model, were required for MC903-evoked itch. Systemic depletion of neutrophils  
140 using daily injections of an anti-Gr1 (aGr1) antibody<sup>54,55</sup> dramatically attenuated itch-evoked  
141 scratching through the first eight days of the model (Figure 2A). Consistent with a key role for  
142 neutrophils in driving chronic itch, our depletion strategy significantly and selectively reduced  
143 circulating and skin infiltrating neutrophils on days five and eight, days on which control, but not  
144 depleted mice, scratched robustly (Figure 2B; Figure 2-Figure Supplement 1A-C). In contrast,  
145 basophils and CD4<sup>+</sup> T cells continued to infiltrate the skin following aGr1 treatment (Figure 2C-  
146 D), suggesting that these cells are not required for early MC903 itch.

147

148 We next used the cheek model of acute itch<sup>56</sup> to ask whether neutrophil recruitment is sufficient  
149 to trigger scratching behaviors. As expected, we observed significant and selective recruitment  
150 of neutrophils to cheek skin within 15 minutes after CXCL1 injection (Figure 2-Figure  
151 Supplement 2A-B). CXCL1 injection also triggered robust scratching behaviors (Figure 2E) on a  
152 similar time course to neutrophil infiltration (Figure 2-Figure Supplement 2B). Thus, we next

153 acutely depleted neutrophils with aGr1 to determine whether neutrophils were required for  
154 CXCL1-evoked acute itch. Indeed, aGr1-treatment rapidly reduced circulating neutrophils  
155 (Figure 2-Figure Supplement 2C) and resulted in a dramatic loss of CXCL1-evoked itch  
156 behaviors (Figure 2C). This effect was specific to neutrophil-induced itch, as injection of  
157 chloroquine, a pruritogen that directly activates pruriceptors to trigger itch, still triggered robust  
158 scratching in aGr1-treated animals (Figure 2-Figure Supplement 3A). Given that CXCL1 has  
159 been shown to directly excite and/or sensitize sensory neurons,<sup>57,58</sup> it is possible that the  
160 mechanism by which CXCL1 elicits itch may also involve neuronal pathways. However, our  
161 results show that CXCL1-mediated neutrophil infiltration is sufficient to drive acute itch  
162 behaviors, and that neutrophils are necessary for itch in the MC903 model.

163  
164 We also examined MC903-evoked itch behaviors in mice deficient in *Crff2*, the gene encoding  
165 the TSLP Receptor (TSLPR<sup>-/-</sup> mice<sup>59</sup>). TSLPR is expressed by both immune cells and sensory  
166 neurons and is a key mediator of AD in humans and in mouse models.<sup>18-20,31,60</sup> Surprisingly,  
167 MC903-treated TSLPR<sup>-/-</sup> mice displayed robust scratching behaviors through the first eight days  
168 of the model (Figure 2F). In contrast to our results in aGr1-injected mice, TSLPR<sup>-/-</sup> mice  
169 displayed robust neutrophil infiltration (Figure 2G), but completely lacked basophil and CD4<sup>+</sup> T  
170 cell infiltration into the skin (Figure 2H-I, Figure 2-Figure Supplement 4A), and additionally  
171 displayed a reduction in mast cells (Figure 2-Figure Supplement 4A). These results suggest that  
172 basophils and CD4<sup>+</sup> T cells are not required for early itch and further support an inciting role for  
173 neutrophils. Previous studies have shown that TSLP drives the expression of Type 2 cytokines  
174 and related immune cells that promote itch and inflammation in mature AD skin lesions.<sup>18-20,31,60</sup>  
175 Consistent with a later role for TSLP signaling in AD, we did observe a significant reduction in  
176 itch-evoked scratching in TSLPR<sup>-/-</sup> mice in the second week of the model (Figure 2F). Thus, our  
177 data support a model in which neutrophils are necessary for initiation of AD and itch behaviors  
178 early in the development of AD, whereas TSLPR signaling mediates the recruitment of  
179 basophils and CD4<sup>+</sup> T cells to promote later stage itch and chronic inflammation.

180  
181 The incomplete loss of itch behaviors on day 12 in the TSLPR<sup>-/-</sup> animals (Figure 2F) raised the  
182 question of whether neutrophils might also contribute to itch during the second week of the  
183 MC903 model. To directly answer this question, we measured neutrophil infiltration and itch-  
184 evoked scratching on day 12 in mice that received either aGr1 or PBS on days 8-11 of the  
185 model to selectively deplete neutrophils solely during the second week. Neutrophil depletion in  
186 the second week with aGr1 robustly decreased skin-infiltrating neutrophils (Figure 2J), and  
187 substantially reduced scratching behaviors at day 12 (Figure 2K), supporting a role for  
188 neutrophils in chronic itch. Interestingly, we observed a 79% mean reduction in time spent  
189 scratching after neutrophil depletion at day 12, whereas loss of TSLPR effected a 44%  
190 reduction in time spent scratching. We speculate that neutrophils and TSLP signaling comprise  
191 independent mechanisms that together account for the majority of AD itch. In order to ascertain  
192 whether neutrophils could be salient players in other models of AD, and not just MC903, we  
193 measured neutrophil infiltration into ear skin in the 1-fluoro-2,4-dinitrobenzene (DNFB) model of  
194 atopic dermatitis, which relies on hapten-induced sensitization to drive increased IgE, mixed  
195 Th1/Th2 cytokine response, skin thickening, inflammation, and robust scratching behaviors in  
196 mice.<sup>61-63</sup> Indeed, neutrophils also infiltrated DNFB- but not vehicle-treated skin (Figure 2-Figure  
197 Supplement 5A). Taken together, these observations are complementary to published datasets  
198 showing evidence for neutrophil chemokines and transcripts in human AD lesions.<sup>11,12,13-15</sup>  
199 Overall, our data support a key role for neutrophils in promoting AD itch and inflammation.

## 201 **MC903 drives rapid and robust changes in the peripheral and central nervous systems**

202 But how do neutrophils drive AD itch? Itchy stimuli are detected and transduced by specialized  
203 subsets of peripheral somatosensory neurons. Thus, to answer this question we first profiled the

204 transcriptional changes in somatosensory neurons in the MC903 model, which were previously  
205 unstudied. In general, little is known regarding neuronal changes in chronic itch. Our initial  
206 examination of early hyperinnervation and changes in axon guidance molecules in skin  
207 suggested that neurons are indeed affected early on in the MC903 model, before the onset of  
208 itch-evoked scratching behaviors. In contrast to the skin, where we saw many early  
209 transcriptional changes, we did not see any significant transcriptional changes in the trigeminal  
210 ganglia (TG) until five days after the first treatment, and in total only 84 genes were differentially  
211 expressed through the eighth day (Figure 3A-B). These hits included genes related to  
212 excitability of itch sensory neurons,<sup>51,64</sup> neuroinflammatory genes,<sup>65</sup> and activity-induced or  
213 immediate early genes (Figure 3A). Interestingly, we observed enrichment of neuronal markers  
214 expressed by one specific subset of somatosensory neurons that are dedicated to itch (*Il31ra*,  
215 *Osmr*, *Trpa1*, *Cysltr2*, and *Nppb*), termed “NP3” neurons.<sup>51,64,66,67</sup> Similar to what has been  
216 reported in mouse models of chronic pain, we observed changes in neuroinflammatory (*Bdnf*,  
217 *Nptx1*, *Nptx2*, *Nptxr*) and immune genes (*Itk*, *Cd19*, *Rag*, *Tmem173*). However, these  
218 transcriptional changes occurred just a few days after itch onset, in contrast to the slow changes  
219 in nerve injury and pain models that occur over weeks, indicating that neuropathic changes may  
220 occur sooner than previously thought in chronic itch. These changes occurred in tandem with  
221 the onset of scratching behaviors (Figure 1C), suggesting that the early molecular and cellular  
222 changes we observed by this time point may be important for development or maintenance of  
223 itch-evoked scratching.

224  
225 The changes we observed in immune-related genes in the TG were suggestive of infiltration or  
226 expansion of immune cell populations, which has been reported in models of nerve injury and  
227 chronic pain, but has never been reported in chronic itch. To validate our observations, we used  
228 IHC to ask whether CD45<sup>+</sup> immune cells increase in the TG. We observed a significant increase  
229 in TG immune cell counts at day eight but not day five (Figure 3C-F, Figure 3-Figure  
230 Supplement 1A-D). Because we observed such dramatic expression changes in the TG on day  
231 eight of the model, we postulated that the CNS may also be affected by this time point. Thus,  
232 we performed RNA-seq on spinal cord segments that innervate the MC903-treated rostral back  
233 skin of mice. To date, only one study has examined changes in the spinal cord during chronic  
234 itch.<sup>68</sup> The authors showed that upregulation of the STAT3-dependent gene *Lcn2* occurred three  
235 weeks after induction of chronic itch and was essential for sustained scratching behaviors.  
236 Surprisingly, we saw upregulation of *Lcn2* on day eight of the MC903 model and, additionally,  
237 we observed robust induction of immediate early genes (*Fos*, *Junb*, Figure 3G), suggesting that  
238 MC903 itch drives activity-dependent changes in the spinal cord as early as one week after  
239 beginning treatment. Together, our findings show that sustained itch and inflammation can drive  
240 changes in the PNS and CNS much sooner than previously thought, within days rather than  
241 weeks after the onset of scratching. We next set out to explore how loss of neutrophils impacts  
242 the molecular changes observed in skin and sensory neurons in the MC903 model, and which  
243 of these changes might contribute to neutrophil-dependent itch.

#### 244 245 **Neutrophils are required for upregulation of select itch- and atopic-related genes,** 246 **including the itch-inducing chemokine CXCL10**

247 To ask how neutrophils promote itch in the MC903 model, we examined the transcriptional  
248 changes in skin and sensory ganglia isolated from non-itchy neutrophil-depleted animals and  
249 from the TSLPR<sup>-/-</sup> mice, which scratched robustly. A number of AD-associated cytokines that  
250 were upregulated in control MC903 skin were not upregulated in TSLPR<sup>-/-</sup> and neutrophil-  
251 depleted skin. For example, *Il33* upregulation is both neutrophil- and TSLPR-dependent (Figure  
252 4A, Figure 4-Figure Supplement 1A). By contrast, upregulation of epithelial-derived cytokines  
253 and chemokines *Tslp*, *Cxcl1*, *Cxcl2*, *Cxcl3*, and *Cxcl5* was unaffected by either loss of TSLPR  
254 or neutrophil depletion (Figure 4B), suggesting these molecules are produced by skin cells even

255 when the MC903-evoked immune response is compromised. Consistent with previous studies,  
256 *Ilf4* upregulation was completely dependent on TSLPR but not neutrophils, establishing a role for  
257 TSLP signaling in the Type 2 immune response. Among the hundreds of MC903-dependent  
258 genes we examined, only a handful of genes were uniquely affected by neutrophil depletion.  
259 One such gene was *Cxcl10*, a chemokine known to be released by skin epithelial cells,  
260 neutrophils, and other myeloid cells.<sup>52,69–74</sup> *Cxcl10* expression was increased in TSLPR<sup>-/-</sup> but not  
261 neutrophil-depleted skin (Figure 4B, Figure 4-Figure Supplement 1A). CXCL10 has been  
262 previously shown to drive acute itch in a model of allergic contact dermatitis via CXCR3  
263 signaling in sensory neurons,<sup>75</sup> and is elevated in skin of AD patients.<sup>49</sup> Expression of *Cxcl9* and  
264 *Cxcl11*, two other CXCR3 ligands that are elevated in AD but have an unknown role in itch, was  
265 also decreased in AD skin of neutrophil-depleted mice (Figure 4B).

266

### 267 **CXCR3 signaling is necessary for MC903-evoked chronic itch**

268 We hypothesized that neutrophil-dependent upregulation of CXCL10 activates sensory neurons  
269 to drive itch behaviors. Consistent with this model, neutrophil depletion attenuated the  
270 expression of activity-induced immediate early genes (*Vgf*, *Junb*) in the TG, suggestive of  
271 neutrophil-dependent sensory neuronal activity (Figure 4C, Figure 4-Figure Supplement 1B).  
272 We found that neutrophils also contributed to other sensory neuronal phenotypes in the model.  
273 For example, we observed that expression of *Lcn2*, a marker of neuropathic itch, and activity-  
274 induced genes *Fos* and *Junb* were not increased in spinal cord isolated from neutrophil-  
275 depleted animals, indicating that neutrophil-dependent scratching behaviors may indeed drive  
276 changes in the CNS (Figure 4D). We also observed that neutrophil-depleted animals displayed  
277 no skin hyperinnervation at day two (Figure 4E). This result was surprising because we did not  
278 observe significant neutrophil infiltration at this early time point, but these data suggest that low  
279 numbers of skin neutrophils are sufficient to mediate these early effects.

280

281 To test our model wherein CXCL10 activates CXCR3 to drive neutrophil-dependent itch, we first  
282 asked whether this CXCR3 ligand is in fact released in MC903-treated skin. We performed  
283 ELISA on cheek skin homogenate and found that CXCL10 protein was increased in MC903-  
284 treated skin from uninjected wild-type and TSLPR<sup>-/-</sup> animals, but not in skin from neutrophil-  
285 depleted mice (Figure 4F). To test whether CXCR3 signaling directly contributes to AD itch, we  
286 asked whether acute blockade of CXCR3 using the antagonist AMG 487<sup>75</sup> affected scratching  
287 behaviors in the MC903 model. We found that the CXCR3 antagonist strongly attenuated  
288 scratching behaviors on days five, eight, and twelve (Figure 4G), with the greatest effect at day  
289 eight. In contrast, CXCR3 blockade did not attenuate scratching behaviors in naive mice  
290 injected with the pruritogen chloroquine (Figure 4G), demonstrating that CXCR3 signaling  
291 contributes to chronic itch but is not required for scratching in response to an acute pruritogen.  
292 Thus, we propose that neutrophils promote chronic itch in atopic dermatitis via upregulation of  
293 CXCL10 and subsequent activation of CXCR3-dependent itch pathways (Figure 5).

294

### 295 **Discussion**

296 There is great interest in unraveling the neuroimmune interactions that promote acute and  
297 chronic itch. Here, we show that neutrophils are essential for the early development of MC903-  
298 evoked itch. We further show that the recruitment of neutrophils to the skin is sufficient to drive  
299 itch behaviors within minutes of infiltration. While neutrophils are known to release a variety of  
300 pruritogens, their roles in itch and AD were not studied.<sup>52</sup> Only a few studies have even reported  
301 the presence of neutrophils in human AD lesions.<sup>12,76–78</sup> Neutrophils have been implicated in  
302 psoriatic inflammation and inflammatory pain,<sup>79–86</sup> where they are thought to rapidly respond to  
303 tissue injury and inflammation,<sup>87</sup> but they have not been directly linked to itch.

304

305 There is a strong precedence for immune cell-neuronal interactions that drive modality-specific  
306 outcomes, such as itch versus pain, under distinct inflammatory conditions. In allergy, mast cells  
307 infiltrate the upper dermis and epidermis and release pruritogens to cause itch,<sup>67,88</sup> whereas in  
308 tissue injury, mast cell activation can trigger pain hypersensitivity.<sup>89</sup> Likewise, neutrophils are  
309 also implicated in both pain and itch. For example, pyoderma gangrenosum, which causes  
310 painful skin ulcerations recruits neutrophils to the deep dermal layers to promote tissue damage  
311 and pain.<sup>52</sup> In AD, neutrophils are recruited to the upper dermis and epidermis,<sup>12,78</sup> and we now  
312 show that neutrophils trigger itch in AD. Adding to the complex and diverse roles of neutrophils,  
313 neutrophils recruited to subcutaneous sites during invasive streptococcal infection alleviate pain  
314 by clearing the tissue of bacteria.<sup>90</sup> Several potential mechanisms may explain these diverse  
315 effects of neutrophils. First, the location of the inflammatory insult could promote preferential  
316 engagement of pain versus itch nerve fibers.<sup>52</sup> This is supported by observations that neutrophil-  
317 derived reactive oxygen species and leukotrienes can promote either itch or pain under different  
318 inflammatory conditions.<sup>91-94</sup> Second, it has been proposed that there are distinct functional  
319 subsets of neutrophils that release modality-specific inflammatory mediators.<sup>95</sup> Third, the  
320 disease-specific inflammatory milieu may induce neutrophils to specifically secrete mediators of  
321 either itch or pain. Indeed, all three of these mechanisms have been proposed to underlie the  
322 diverse functions of microglia and macrophages in homeostasis, tissue repair, injury, and  
323 neurodegenerative disease.<sup>96</sup> It will be of great interest to the field to decipher the distinct  
324 mechanisms by which neutrophils and other immune cells interact with the nervous system to  
325 drive pain and itch.

326  
327 In addition to neutrophils, TSLP signaling and the Type 2 immune response plays an important  
328 role in the development of itch in the second week of the MC903 model. Dendritic cells, mast  
329 cells, basophils, and CD4<sup>+</sup> T cells are all major effectors of the TSLP inflammatory pathway in  
330 the skin. We propose that neutrophils play an early role in triggering itch and also contribute to  
331 chronic itch in parallel with the TSLP-Type 2 response. While we have ruled out an early role for  
332 TSLP signaling and basophils and CD4<sup>+</sup> T cells in early itch,<sup>67,88</sup> other cell types such as mast cells,  
333 which have recently been linked directly to chronic itch,<sup>67,88</sup> and dendritic cells may be playing  
334 an important role in setting the stage for itch and inflammation prior to infiltration of neutrophils.

335  
336 Given the large magnitude of the itch deficit in the neutrophil-depleted mice, we were surprised  
337 to find fewer expression differences in MC903-dependent, AD-associated genes between  
338 neutrophil depleted and non-depleted mice than were observed between WT and TSLPR<sup>-/-</sup>  
339 mice. One of the few exceptions were the Th1-associated genes *Cxcl9/10/11*.<sup>11,97</sup> We found that  
340 induction of these genes and of CXCL10 protein was completely dependent on neutrophils.  
341 While our results do not identify the particular cell type(s) responsible for neutrophil-dependent  
342 CXCL10 production, a number of cell types present in skin have been shown to produce  
343 CXCL10, including epithelial keratinocytes, myeloid cells, and sensory neurons.<sup>52,69-74</sup> In support  
344 of a role for neutrophils in promoting chronic itch, we observed striking differences in neutrophil-  
345 dependent gene expression in the spinal cord, where expression of activity-induced genes and  
346 the chronic itch gene *Lcn2* were markedly attenuated by loss of neutrophils. Moreover, we also  
347 demonstrate that depletion of neutrophils in the second week of the MC903 model can  
348 attenuate chronic itch-evoked scratching. In examining previous characterizations of both  
349 human and mouse models of AD and related chronic itch disorders, several studies report that  
350 neutrophils and/or neutrophil chemokines are indeed present in chronic lesions.<sup>11-16,98-102</sup> Our  
351 observations newly implicate neutrophils in setting the stage for the acute-to-chronic itch  
352 transition by triggering molecular changes necessary to develop a chronic, itchy lesion and also  
353 contributing to persistent itch.

354



355 Additionally, we demonstrate a novel role of CXCR3 signaling in MC903-induced itch. The  
356 CXCR3 ligand CXCL10 contributes to mouse models of acute and allergic itch;<sup>75,103,104</sup> however,  
357 its role in chronic itch was previously unknown. We speculate that the residual itch behaviors  
358 after administration of the CXCR3 antagonist could be due to TSLPR-dependent IL-4 signaling,  
359 as TSLPR-deficient mice display reduced itch behaviors by the second week of the model, or  
360 due to some other aspect of neutrophil signaling, such as release of proteases, leukotrienes,  
361 prostaglandins, or reactive oxygen species, all of which can directly trigger itch via activation of  
362 somatosensory neurons.<sup>52</sup> Our observations are in alignment with a recent study showing that  
363 dupilumab, a new AD drug that blocks IL4R $\alpha$ , a major downstream effector of the TSLP  
364 signaling pathway, does not significantly reduce CXCL10 protein levels in human AD lesions.<sup>105</sup>  
365 Taken together, these findings suggest that the TSLP/IL-4 and neutrophil/CXCL10 pathways are  
366 not highly interdependent, and supports our findings that *Il4* transcript is robustly upregulated in  
367 the absence of neutrophils. Additionally, targeting IL4R $\alpha$  signaling has been successful in  
368 treating itch and inflammation in some, but not all, AD patients.<sup>106</sup> We propose that biologics or  
369 compounds targeting neutrophils and/or the CXCR3 pathway may be useful for AD that is  
370 incompletely cleared by dupilumab monotherapy. Drugs targeting neutrophils are currently in  
371 clinical trials for the treatment of psoriasis, asthma, and other inflammatory disorders. For  
372 example, MDX-1100, a biologic that targets CXCL10, has already shown efficacy for treatment  
373 of rheumatoid arthritis in phase II clinical trials.<sup>107</sup> While rheumatoid arthritis and AD have  
374 distinct etiologies,<sup>108</sup> our body of work indicates that CXCL10 or CXCR3 may be promising  
375 targets for treating chronic itch. Our findings may also be applicable to other itch disorders  
376 where neutrophil chemoattractants and/or CXCL10 are also elevated, such as psoriasis and  
377 allergic contact dermatitis. Overall, our data suggest that neutrophils incite itch and inflammation  
378 in early AD through several mechanisms, including: 1) directly triggering itch upon infiltration  
379 into the skin, as shown by acute injection of CXCL1, and, 2) indirectly triggering itch by altering  
380 expression of endogenous pruritogens (e.g. induction of *Cxcl10* expression<sup>52,69-74</sup>). Together,  
381 these direct and indirect mechanisms for neutrophil-dependent itch may explain why neutrophils  
382 have a dramatic effect on scratching behaviors on not only days eight and twelve but also day  
383 five of the model, when neutrophils are recruited in large numbers, but CXCR3 ligands are not  
384 as robustly induced.

386 More generally, our study provides a framework for understanding how and when human  
387 chronic itch disease genes contribute to the distinct stages of AD pathogenesis. Our analysis of  
388 MC903-evoked transcriptional changes suggests we may be able to extend findings in the  
389 model not only to atopic dermatitis, but also to related disorders, including specific genetic forms  
390 of atopy. For example, we provide evidence that MC903 treatment may also model the filaggrin  
391 loss-of-function mutations, which are a key inciting factor in human heritable atopic disease.<sup>45,46</sup>  
392 There are many rich datasets looking at mature patient lesions and datasets for mature lesions  
393 in other mouse models of chronic itch.<sup>11-13,15,16,22,101,109</sup> Our study adds a temporal frame of  
394 reference to these existing datasets and sets the stage for probing the function of AD disease  
395 genes in greater detail. Furthermore, we have mapped the time course of gene expression  
396 changes in primary sensory ganglia and spinal cord during chronic itch development. We show  
397 that the MC903 model recapitulates several hallmarks of neuropathic disease on a time course  
398 much shorter than has been reported for chronic itch, or chronic pain. Nervous system tissues  
399 are extremely difficult to obtain from human AD patients, and thus little is known regarding the  
400 neuronal changes in chronic itch disorders in both mouse models and human patients. Our  
401 findings can now be compared to existing and future datasets examining neuronal changes in  
402 chronic pain, diabetic neuropathy, shingles, neuropathic itch, psoriasis, and other inflammatory  
403 disorders where neuronal changes are poorly understood but may contribute to disease  
404 progression. The early changes we see in skin innervation, sensory ganglia, and spinal cord  
405 dovetail with recent studies examining neuroimmune interactions in other inflammatory

406 conditions,<sup>90,110–112</sup> which all implicate early involvement of sensory neurons in the pathogenesis  
407 of inflammatory diseases.

408  
409 **Figure 1. The MC903 model parallels the progression of human atopic disease and**  
410 **suggests a temporal sequence of AD pathogenesis. A.** Exact permutation test (10,000  
411 iterations, see Methods) for significance of mean absolute log<sub>2</sub> fold change in gene expression  
412 at Day 8 (MC903 vs. ethanol) of custom-defined groups of genes for indicated categories (see  
413 **Figure 1-source data 1**). **B.** Log<sub>2</sub> fold change in gene expression (MC903 vs. ethanol) in  
414 mouse skin at indicated time points for key immune and mouse/human AD genes that were  
415 significantly differentially expressed for at least one time point in the MC903 model. Only genes  
416 from our initial list (see Methods) differentially expressed at corrected  $p < 0.05$  and changing  $>$   
417 2-fold between treatments for at least one condition are shown. Green bars = increased  
418 expression in MC903 relative to ethanol; magenta = decreased expression. Exact values and  
419 corrected  $p$ -values are reported in **Figure 1-source data 2** and **Supplemental Data**,  
420 respectively. D1 = 6 hours post-treatment; D2 = Day 2; D5 = Day 5; D8 = Day 8. **C.** Scratching  
421 behavior of mice treated with MC903 or ethanol for indicated length of time (two-way ANOVA:  
422 \*\*\*\* $p_{\text{interaction}} < 0.0001$ ,  $F(2,409) = 13.25$ ; Sidak's multiple comparisons:  $p_{\text{day } 3} = 0.1309$ ,  $n=62,51$   
423 mice; \* $p_{\text{day } 5} = 0.0171$ ,  $n=69,56$  mice; \*\*\*\* $p_{\text{day } 8} < 0.0001$ ,  $n=92,85$  mice). Exact values displayed  
424 in **Figure 1-source data 3**. **D.** Log<sub>2</sub> fold change in gene expression of neutrophil  
425 chemoattractants (upper), Th2 cytokines (middle) and T cell chemoattractants (lower, from  
426 RNA-seq data). **E.** Neutrophil counts in MC903- and ethanol-treated skin at indicated time  
427 points (two-way ANOVA: \*\* $p_{\text{treatment}} = 0.0023$ ,  $F(1,102) = 9.82$ ; Sidak's multiple comparisons:  $p_{\text{day } 2}$   
428  $> 0.999$ ,  $n=4,4$  mice;  $p_{\text{day } 3} = 0.9801$ ,  $n=5,5$  mice; \*\*\* $p_{\text{day } 5} = 0.0003$ ,  $n=6,8$  mice; \*\*\* $p_{\text{day } 8} =$   
429  $0.0001$ ,  $n=40,38$  mice). **F.** Basophil counts in MC903- and ethanol-treated skin at indicated time  
430 points (two-way ANOVA: \*\* $p_{\text{treatment}} = 0.0051$ ,  $F(1,102) = 8.17$ ; Sidak's multiple comparisons:  $p_{\text{day } 2}$   
431  $> 0.999$ ,  $n=4,4$  mice;  $p_{\text{day } 3} = 0.8850$ ,  $n=5,5$  mice;  $p_{\text{day } 5} = 0.0606$ ,  $n=6,8$  mice; \*\*\*\* $p_{\text{day } 8} <$   
432  $0.0001$ ,  $n=40,38$  mice). **G.** CD4<sup>+</sup> T cell counts in MC903- and ethanol-treated skin at indicated  
433 time points (two-way ANOVA: \*\* $p_{\text{time}} = 0.0042$ ,  $F(1,44) = 9.10$ ;  $p_{\text{day } 3} = 0.9998$ ,  $n=8,6$  mice;  $p_{\text{day } 5}$   
434  $= 0.2223$ ,  $n=9,8$  mice; \*\* $p_{\text{day } 8} = 0.0021$ ,  $n=11,8$  mice). Day 8 immune cell infiltrate represented  
435 as % of CD45<sup>+</sup> cells in **Figure 1-Figure Supplement 2A-B** (see **Supplementary Table 3** for all  
436 experimental conditions). Exact values displayed in **Figure 1-source data 4** and representative  
437 FACS plots for myeloid and T cell gating shown in **Figure 1-Figure Supplement 3A** and **Figure**  
438 **1-Figure Supplement 4A**. For Figure 4E-G, data from mice receiving i.p. injection of PBS (see  
439 Figure 4) in addition to MC903 or EtOH are also included. **H.** (Upper and Lower) Representative  
440 maximum intensity Z-projections from immunohistochemistry (IHC) of whole-mount mouse skin  
441 on Day 2 of the MC903 model. Skin was stained with neuronal marker beta-tubulin III (BTIII;  
442 green). Hair follicle autofluorescence is visible in the magenta channel. Images were acquired  
443 on a confocal using a 20x water objective. **I.** Quantification of innervation (see Methods) of  
444 mouse skin as determined from BTIII staining (\* $p = 0.012$ ; two-tailed t-test ( $t = 3.114$ ;  $df = 9$ );  $n =$   
445  $7,4$  images each from 2 mice per treatment). Day 1 IHC results as follows:  $31.78 \pm 18.39$  %  
446 (MC903) and  $31.51 \pm 16.43$  % (EtOH);  $p = 0.988$ ; two-tailed unpaired t-test;  $n = 6$  images each  
447 from 2 mice per treatment. Exact values are reported in **Figure 1-source data 5**. **J.**  
448 Quantification of CGRP<sup>+</sup> nerve fibers (see Methods) in skin (\*\* $p = 0.0083$ ; two-tailed t-test ( $t$   
449  $= 2.868$ ;  $df = 25$ );  $n=15$ , 12 images from 3 mice per treatment). Exact values are reported in  
450 **Figure 1-source data 5**. Representative images in **Figure 1-Figure Supplement 9A**.

451  
452 **Figure 1-Figure Supplement 1. Expression of mouse and human itch genes. A.** Log<sub>2</sub> fold  
453 change in gene expression (MC903 vs. ethanol) in mouse skin at indicated time points for  
454 genes implicated in mouse or human acute or chronic itch that were significantly differentially  
455 expressed for at least one time point in the MC903 model. Green bars = increased expression

456 in MC903 relative to ethanol; magenta = decreased expression. Exact values and corrected  $p$ -  
457 values are reported in **Figure 1-source data 6** and **Supplemental Data**, respectively.

458  
459 **Figure 1-Figure Supplement 2. Immune cells represented as % of CD45<sup>+</sup> cells. A.** Number  
460 of CD45<sup>+</sup> cells in MC903-treated skin on days 2-8 of the model. **B.** Skin-infiltrating immune cell  
461 subtypes on days 2-8 of the MC903 model shown in **Figure 1**, represented as % of CD45<sup>+</sup> cells.  
462 CD4<sup>+</sup> T cell measurements were acquired using a separate staining panel from different animals  
463 than the myeloid cell measurements (see Methods) and were not included. See  
464 **Supplementary Table 3** for % of CD45<sup>+</sup> cell measurements for all flow cytometry experiments.  
465 Error bars represent mean  $\pm$  SEM.

466  
467 **Figure 1-Figure Supplement 3. Myeloid and granulocyte gating strategy. A-C.**  
468 Representative FACS plots of cells isolated from MC903-treated cheek skin showing gating  
469 strategy for neutrophils (A), inflammatory monocytes (A), mast cells (B), basophils (B), and  
470 eosinophils (C) as shown in **Figure 1E-F** and **Figure 1-Figure Supplement 5**.

471  
472 **Figure 1-Figure Supplement 4. T cell gating strategy. A.** Representative FACS plots of cells  
473 isolated from MC903-treated cheek skin showing gating strategy for CD4<sup>+</sup> T cells as shown in  
474 **Figure 1G**.

475  
476 **Figure 1-Figure Supplement 5. Immune cell counts in MC903-treated skin. A.** Inflammatory  
477 monocyte counts in MC903- and ethanol-treated skin at indicated time points (two-way ANOVA:  
478  $p_{\text{treatment}} = 0.0662$ ,  $F(1,102) = 3.44$ ;  $n=4,4,5,5,6,8,40,38$  mice). **B.** Mast cell counts in MC903- and  
479 ethanol-treated skin at indicated time points (two-way ANOVA:  $**p_{\text{treatment}} = 0.0024$ ,  $F(1,102) =$   
480  $9.69$ ; Sidak's multiple comparisons:  $p_{\text{day } 2} > 0.999$ ,  $n=4,4$  mice;  $p_{\text{day } 3} = 0.3019$ ,  $n=5,5$  mice;  $p_{\text{day } 5}$   
481  $= 0.0586$ ,  $n=6,8$  mice;  $****p_{\text{day } 8} < 0.0001$ ,  $n=40,38$  mice). **C.** Eosinophil counts in MC903- and  
482 ethanol-treated skin at indicated time points (two-way ANOVA:  $p_{\text{time}} = 0.0471$ ,  $F(3,102) = 2.74$ ;  
483 Sidak's multiple comparisons:  $p_{\text{day } 2} > 0.999$ ,  $n=4,4$  mice;  $p_{\text{day } 3} = 0.3596$ ,  $n=5,5$  mice;  $p_{\text{day } 5} =$   
484  $0.9998$ ,  $n=6,8$  mice;  $**p_{\text{day } 8} = 0.0020$ ,  $n=40,38$  mice). Data from mice receiving i.p. injection of  
485 PBS (see Figure 4) in addition to MC903 or EtOH are also included. Exact values displayed in  
486 **Figure 1-source data 4**.

487  
488 **Figure 1-Figure Supplement 6. Protease receptor activation triggers rapid upregulation of**  
489 **neutrophil chemoattractant genes in human keratinocytes. A.** Heat map showing  $\log_2$  fold  
490 change in gene expression in cultured human keratinocytes 3 hours after SLIGRL treatment  
491 (100  $\mu\text{M}$ ; bottom; see **Figure 1-source data 7**) compared to vehicle controls, as measured by  
492 RNA-seq. Genes are sorted by descending corrected  $p$ -value; only significantly differentially  
493 expressed ( $p < 0.05$ ) are displayed. Exact values and corrected  $p$ -values are reported in **Figure**  
494 **1-source data 7** and **Supplemental Data**, respectively.

495  
496 **Figure 1-Figure Supplement 7. Expression of neuronal genes and axon guidance**  
497 **molecules in skin. A.**  $\log_2$  fold change in gene expression (MC903 vs. EtOH) in mouse skin at  
498 indicated time points for markers of locally translated sensory neuronal transcripts or genes  
499 implicated in neurite remodeling and/or axon guidance that were significantly differentially  
500 expressed for at least one time point in the MC903 model. Green bars = increased expression  
501 in MC903 relative to ethanol; magenta = decreased expression. Exact values and corrected  $p$ -  
502 values are reported in **Figure 1-source data 8** and **Supplemental Data**, respectively.

503  
504 **Figure 1-Figure Supplement 8. Method of image quantification for whole mount skin. A.**  
505 Representative maximum intensity z-projection of beta tubulin III staining in cheek skin. **B.**

506 Binary image after edge-detection. **C.** % Area innervated was calculated from the percentage of  
507 the image area which was occupied by the regions of interest (ROIs) outlined in red.

508  
509 **Figure 1-Figure Supplement 9. Peptidergic fibers display hyperinnervation in MC903-**  
510 **treated skin. A.** Representative maximum intensity Z-projections from immunohistochemistry  
511 (IHC) of whole-mount mouse skin on day 2 of the MC903 model. Skin was stained with  
512 peptidergic neuronal marker Calcitonin related-gene peptide (CGRP; white). Images were  
513 acquired on a confocal microscope using a 20x water objective.

514  
515 **Figure 1-Figure Supplement 10. Inflammatory lipids in MC903-treated skin. A.**  
516 Quantification of indicated lipids from 6 mm biopsy punches of cheek skin of MC903- and EtOH-  
517 treated mice (at day 8) by LC-MS/MS (\*\*p = 0.006 ( $t=4.148, df=6$ ), \*p = 0.024 ( $t=3.003, df=6$ ),  
518 \*\*\*p = 0.0007 ( $t=6.392, df=6$ ), \*p = 0.022 ( $t=3.058, df=6$ ); two-tailed unpaired t-tests; n = 4 mice  
519 per group, see **Figure 1-source data 8**).

520  
521 **Figure 1-source data 1.** Values displayed in the bar plot shown in Figure 1A.

522 **Figure 1-source data 2.** Values displayed in the heat map shown in Figure 1B.

523 **Figure 1-source data 3.** Values displayed in the bar plot shown in Figure 1C.

524 **Figure 1-source data 4.** Values displayed in the bar plots shown in Figure 1E-G and Figure 1-  
525 Figure Supplement 5A-C.

526 **Figure 1-source data 5.** Values displayed in the bar plots shown in Figure 1I and Figure 1J.

527 **Figure 1-source data 6.** Values displayed in the heat map shown in Figure1-Figure  
528 Supplement 1A.

529 **Figure 1-source data 7.** Values displayed in the heat map shown in Figure1-Figure  
530 Supplement 6A.

531 **Figure 1-source data 8.** Values displayed in the heat map shown in Figure1-Figure  
532 Supplement 7A.

533 **Figure 1-source data 9.** Values displayed in the bar plot shown in Figure1-Figure Supplement  
534 10A.

535  
536 **Supplementary Table 1.** Number of mapped reads and sample information for all RNA-seq  
537 samples represented in the manuscript.

538  
539 **Supplementary Table 2.** Outputs of statistical tests performed on behavioral and flow  
540 cytometry data to determine whether select data sets could be combined.

541  
542 **Supplementary Table 3.** All flow cytometry data from Figures 1-2 represented as % of CD45<sup>+</sup>  
543 cells.

544  
545 **Supplemental Data.** DESeq differential expression output tables for all RNA-seq experiments  
546 in the manuscript.

547

548 **Figure 2. Neutrophils are necessary and sufficient for itch behaviors. A.** Scratching  
549 behavior of uninjected and PBS-injected mice (combined) and aGr1-injected mice treated with  
550 MC903 or ethanol for indicated length of time (two-way ANOVA: \*\*\*\* $p_{\text{interaction}} < 0.0001$ ,  $F(4,447)$   
551 = 7.16; Tukey's multiple comparisons:  $p_{\text{day 3 MC903 vs. EtOH}} = 0.1111$  n=62,51,17 mice; \* $p_{\text{day 5 MC903 vs. EtOH}} = 0.0154$ ,  
552  $p_{\text{day 5 MC903 vs. aGr1}} = 0.9854$ ,  $p_{\text{day 5 aGr1 vs. EtOH}} = 0.2267$ , n=69,56,17 mice; \*\*\*\* $p_{\text{day 8 MC903 vs. EtOH}} < 0.0001$ ,  
553 \*\*\*\* $p_{\text{day 8 MC903 vs. aGr1}} = 0.0007$ ,  $p_{\text{day 8 aGr1 vs. EtOH}} = 0.1543$ , n=92,85,17 mice).  
554 **B.** Neutrophil count from cheek skin of uninjected/PBS-injected MC903- and ethanol-treated,  
555 and aGr1-injected MC903-treated mice on day 8 (one-way ANOVA: \*\*\*\* $p < 0.0001$ ,  $F(2,92) = 10.59$ ;  
556 Tukey's multiple comparisons: \*\*\*\* $p_{\text{MC903 vs. EtOH}} < 0.00001$ , n=40,38 mice; \* $p_{\text{MC903 vs. aGr1 MC903}} = 0.0109$ ,  
557 n=40,17 mice;  $p_{\text{aGr1 vs. EtOH}} = 0.8859$ , n=38,17 mice). **C.** Basophil count from  
558 cheek skin of uninjected/PBS-injected MC903- and ethanol-treated, and aGr1-injected MC903-  
559 treated mice on day 8 (one-way ANOVA: \*\*\*\* $p = 0.0001$ ,  $F(2,92) = 14.61$ ; Tukey's multiple  
560 comparisons:  $p_{\text{MC903 vs. aGr1 MC903}} = 0.3217$ , n=40,17 mice, \*\*\*\* $p_{\text{MC903 vs. EtOH}} < 0.0001$ , n=40,38  
561 mice, \* $p_{\text{aGr1 MC903 vs. EtOH}} = 0.0204$ , n=17,38 mice). **D.** CD4<sup>+</sup> T cell count from cheek skin of PBS-  
562 injected MC903- and ethanol-treated, and aGr1-injected MC903-treated mice on day 8 (two-way  
563 ANOVA: \*\* $p_{\text{treatment}} = 0.0035$ ,  $F(1,35) = 9.82$ ; Holm-Sidak multiple comparisons for PBS versus  
564 aGr1:  $p_{\text{MC903}} = 0.8878$ , n=9,11 mice;  $p_{\text{EtOH}} = 0.5201$ , n=8,9 mice). Control MC903 and EtOH data  
565 from **Figure 2B-C** are also displayed in **Figure 1**. Exact values displayed for **Figure 2A-D** in  
566 **Figure 2-source data 1**. **E.** Scratching behavior of mice immediately after injection of 1  $\mu\text{g}$   
567 CXCL1 or PBS (s.c. cheek). For neutrophil-depletion experiments, mice received 250  $\mu\text{g}$  anti-  
568 Gr1 (aGr1) 20 hours prior to cheek injection of CXCL1 or PBS (one-way ANOVA: \*\*\*\* $p <$   
569  $0.0001$ ,  $F(4,88) = 75.53$ ; Tukey's multiple comparisons: \* $p_{\text{CXCL1 vs. PBS}} = 0.0126$ , n=36,31 mice;  
570  $p_{\text{aGr1-CXCL1 vs. aGr1-PBS}} > 0.9999$ , n=10,10 mice;  $p_{\text{aGr1-CXCL1 vs. PBS}} = 0.9986$ , n=10,31 mice). Exact  
571 values displayed in **Figure 2-source data 2**. **F.** Scratching behavior of WT and TSLPR<sup>-/-</sup>  
572 (TSLPR KO) mice treated with MC903 or ethanol for indicated length of time (two-way ANOVA:  
573 \*\*\*\* $p_{\text{interaction}} < 0.0001$ ,  $F(9,657) = 4.93$ ; Tukey's multiple comparisons: \*\*\*\* $p_{\text{day 8 WT MC903 vs. EtOH}} <$   
574  $0.0001$ , \* $p_{\text{day 8 WT MC903 vs. KO MC903}} = 0.0194$ , \*\* $p_{\text{day 8 KO MC903 vs. KO EtOH}} = 0.0039$ , n=92,85,36,26 mice;  
575 \*\*\*\* $p_{\text{day 12 WT MC903 vs. EtOH}} < 0.0001$ , \*\* $p_{\text{day 12 WT MC903 vs. KO MC903}} = 0.0028$ ,  $p_{\text{day 12 KO MC903 vs. KO EtOH}} =$   
576  $0.7061$ , n=26,26,27,23 mice). **G.** Neutrophil count from cheek skin of wild-type MC903- and  
577 ethanol-treated, and TSLPR<sup>-/-</sup> MC903-treated mice on day 5 (two-way ANOVA: \*\* $p_{\text{genotype}} =$   
578  $0.0025$ ,  $F(2,125) = 6.28$ ; Tukey's multiple comparisons: \*\*\*\* $p_{\text{day 5 WT MC903 vs. WT EtOH}} < 0.0001$ ,  
579 n=6,8 mice;  $p_{\text{day 5 WT MC903 vs. KO MC903}} = 0.2198$ , n=6,6 mice; \* $p_{\text{day 5 WT EtOH vs. KO MC903}} = 0.0212$ , n=8,6  
580 mice). **H.** Basophil count from cheek skin of wild-type MC903- and ethanol-treated, and TSLPR<sup>-/-</sup>  
581 MC903-treated mice on day 8 (two-way ANOVA: \*\* $p_{\text{genotype}} = 0.0003$ ,  $F(2,117) = 8.87$ ; Tukey's  
582 multiple comparisons: \*\*\*\* $p_{\text{day 8 WT MC903 vs. WT EtOH}} < 0.0001$ , n=40,38 mice; \*\*\*\* $p_{\text{day 8 WT MC903 vs. KO}}$   
583  $\text{MC903} < 0.0001$ , n=40,15 mice;  $p_{\text{day 8 WT EtOH vs. KO MC903}} = 0.9519$ , n=38,15 mice). See also **Figure**  
584 **2-Figure Supplement 5A**. For **Figures 2G-H**, data from days 3, 5, and 8 are presented in  
585 **Figure 2-source data 3**. **I.** CD4<sup>+</sup> T cell count from cheek skin of wild-type MC903- and ethanol-  
586 treated, and TSLPR<sup>-/-</sup> MC903-treated mice on day 8 (one-way ANOVA: \*\* $p = 0.0053$ ,  $F(2,24) =$   
587  $6.564$ ; Tukey's multiple comparisons: \* $p_{\text{WT MC903 vs. WT EtOH}} = 0.0163$ , n=11,8 mice; \* $p_{\text{MC903 vs. KO}}$   
588  $\text{MC903} = 0.0130$ , n=11,8 mice;  $p_{\text{WT EtOH vs. KO MC903}} = 0.9953$ , n=8,8 mice). Wild-type MC903 and  
589 EtOH data from **2F-H** are also displayed in **Figure 1**. Exact values for **Figure 2F-I** displayed in  
590 **Figure 2-source data 3**. **J.** Neutrophil count from cheek skin of wild-type MC903- and ethanol-  
591 treated mice on day 12 of the MC903 model. MC903-treated animals received daily i.p.  
592 injections of 250  $\mu\text{g}$  aGr1 antibody or PBS (250  $\mu\text{L}$ ) on days 8-11 of the model (one-way  
593 ANOVA: \* $p = 0.01$ ,  $F(2,13) = 6.69$ ; Tukey's multiple comparisons: \* $p_{\text{MC903-PBS vs. EtOH}} = 0.0141$ ,  
594 n=6,5 mice; \* $p_{\text{MC903-PBS vs. MC903-aGr1}} = 0.10330$ , n=6,5 mice;  $p_{\text{MC903-aGr1 vs. EtOH}} = 0.9005$ , n=5,5  
595 mice). **K.** Time spent scratching over a thirty minute interval for wild-type MC903- and ethanol-  
596 treated mice on day 12 of the MC903 model. MC903-treated animals received daily i.p.  
597 injections of 250  $\mu\text{g}$  aGr1 antibody or PBS (250  $\mu\text{L}$ ) on days 8-11 of the model (one-way  
598 ANOVA: \*\*\*\* $p < 0.0001$ ,  $F(2,26) = 53.1$ ; Tukey's multiple comparisons: \*\*\*\* $p_{\text{MC903-PBS vs. EtOH}} <$

599 0.0001, n=12,5 mice; \*\*\*\* $p_{MC903-PBS \text{ vs. } MC903-aGr1} < 0.0001$ , n=12,12 mice;  $p_{MC903-aGr1 \text{ vs. } EtOH} =$   
600 0.3734, n=12,5 mice). Values from bar plots are reported in **Figure 2-source data 5**.

601  
602 **Figure 2-Figure Supplement 1. aGr1 treatment preferentially depletes neutrophils. A.**  
603 Representative flow cytometry plots of cells collected from blood of mice injected with PBS or  
604 aGr1 (250  $\mu$ g, i.p.) once-daily for five days concurrent with daily MC903 topical treatment.  
605 Shown are CD45.2<sup>+</sup>CD11b<sup>+</sup> cells, plotted by Ly6G and Ly6C signal, with neutrophil (Neuts.) and  
606 inflammatory monocyte (IMs) populations indicated. Neutrophils were defined as  
607 Cd11b<sup>+</sup>Ly6G<sup>+</sup>Ly6C<sup>mid/high</sup> and IMs were defined as Cd11b<sup>+</sup>Ly6G<sup>+</sup>Ly6C<sup>high</sup> (see Methods). **B.**  
608 Representative flow cytometry plot as in **A**, depicting neutrophil and IM populations from blood  
609 collected on day 8. **C. (Left)** Neutrophil counts in blood shown as % of Cd11b<sup>+</sup> cells from  
610 aGr1/MC903 (black triangles) and PBS/MC903 (gray circles)-treated animals on days 3, 5, and  
611 8 of the model (two-way repeated measures ANOVA: \*\*\*\* $p_{\text{treatment}} < 0.0001$ ,  $F(1,31) = 299.5$ ;  
612 Sidak's multiple comparisons: \*\*\*\* $p_{\text{day } 3} < 0.0001$ ; \*\*\*\* $p_{\text{day } 5} < 0.0001$ ; \*\*\*\* $p_{\text{day } 8} < 0.0001$ , n= 16,17  
613 mice). **(Right)** Inflammatory monocyte counts in blood shown as % of Cd11b<sup>+</sup> cells from  
614 aGr1/MC903 and PBS/MC903-treated animals on days 3, 5, and 8 of the model (two-way  
615 repeated measures ANOVA: \* $p_{\text{treatment}} = 0.0468$ ,  $F(1,31) = 4.287$ ; Sidak's multiple comparisons:  
616 \*\* $p_{\text{day } 3} = 0.0015$ ;  $p_{\text{day } 5} = 0.1918$ ;  $p_{\text{day } 8} = 0.2013$ , n= 16,17 mice). Exact values displayed in  
617 **Figure 2-source data 4**.

618  
619 **Figure 2-Figure Supplement 2. CXCL1 rapidly and selectively recruits neutrophils to skin.**  
620 **A.** Representative flow cytometry plots of cells from cheek skin of mice injected with PBS or  
621 CXCL1 (1  $\mu$ g in 20  $\mu$ L, s.c.). Shown are CD45.2<sup>+</sup>CD11b<sup>+</sup> cells, plotted by Ly6G and Ly6C signal,  
622 with neutrophil and inflammatory monocyte (IMs) populations indicated. **B.** Neutrophil count  
623 from cheek skin of mice 5, 15, and 30 minutes after injection of CXCL1 or PBS (two-way  
624 ANOVA: \* $p_{\text{interaction}} = 0.0239$ ,  $F(2,21) = 4.48$ ; Sidak's multiple comparisons:  $p_{5 \text{ min}} > 0.9999$ , n=4,5  
625 mice; \* $p_{\text{day } 15 \text{ min}} = 0.0141$ , n=4,4 mice; \*\* $p_{\text{day } 30 \text{ min}} = 0.0031$ , n=3,7 mice). Exact values displayed  
626 in **Figure 2-source data 2**. **C.** Blood neutrophils as % of Cd11b<sup>+</sup> cells approximately 20 hours  
627 after injection of 250  $\mu$ g aGr1 (n=15 mice). Mice assayed for CXCL1-evoked itch behavior  
628 immediately preceding blood isolation (see **Figure 2E**). Exact values displayed in **Figure 2-**  
629 **source data 2**. See **Figure 2-Figure Supplement 1C** for representative blood neutrophil  
630 measurements from PBS-injected animals.

631  
632 **Figure 2-Figure Supplement 3. Neutrophil depletion does not affect chloroquine-evoked**  
633 **itch. A.** Scratching behavior of mice immediately after injection of chloroquine (CQ) or PBS (s.c.  
634 cheek). For neutrophil-depletion experiments, mice received 250  $\mu$ g anti-Gr1 (aGr1) 20 hours  
635 prior to cheek injection of CQ or PBS (two-tailed t-test: \*\*\*\* $p < 0.0001$  ( $t=10.58$ ,  $df=14$ ); n=6,10  
636 mice). Exact values displayed in **Figure 2-source data 2**.

637  
638 **Figure 2-Figure Supplement 4. Loss of TSLPR reduces skin basophil and mast cell**  
639 **numbers in the first week of AD development. A.** Basophil count from cheek skin of wild-type  
640 MC903- and ethanol-treated, and TSLPR<sup>-/-</sup> MC903-treated mice after 3 or 5 days of treatment  
641 (two-way ANOVA: \*\*\* $p_{\text{time}} = 0.0003$ ,  $F(2,117) = 8.87$ ; Tukey's multiple comparisons:  $p_{\text{day } 3 \text{ WT MC903}}$   
642  $\text{vs. KO MC903} = 0.6540$ , n=3,5 mice; \* $p_{\text{day } 5 \text{ WT MC903 vs. KO MC903}} = 0.1023$ , n=6,6 mice;  $p_{\text{day } 5 \text{ WT EtOH vs. KO}}$   
643  $\text{MC903} = 0.9077$ , n=8,6 mice;  $p_{\text{day } 5 \text{ WT MC903 vs. WT EtOH}} = 0.0264$ , n=6,8 mice). **B.** Mast cell count from  
644 cheek skin of wild-type MC903- and ethanol-treated, and TSLPR<sup>-/-</sup> MC903-treated mice after 3,  
645 5, or 8 days of treatment (two-way ANOVA: \* $p_{\text{genotype}} = 0.0384$ ,  $F(2,117) = 3.35$ ; Tukey's multiple  
646 comparisons:  $p_{\text{day } 3 \text{ WT MC903 vs. KO MC903}} = 0.4133$ , n=3,5 mice;  $p_{\text{day } 5 \text{ WT MC903 vs. KO MC903}} = 0.9882$ ,  
647 n=6,6 mice; \* $p_{\text{day } 5 \text{ WT MC903 vs. WT EtOH}} = 0.0440$ , n=6,5 mice; \* $p_{\text{day } 5 \text{ KO MC903 vs. WT EtOH}} = 0.0294$ , n=6,5  
648 mice; \* $p_{\text{day } 8 \text{ WT MC903 vs. KO MC903}} = 0.0188$ , n=40,15 mice; \*\*\*\* $p_{\text{day } 8 \text{ WT MC903 vs. WT EtOH}} < 0.0001$ ,

649 n=40,38 mice;  $p_{\text{day 8 WT EtOH vs. KO MC903}} = 0.7810$ , n=38,15 mice). Data from days 3, 5, and 8 are  
650 presented in **Figure 2-source data 3**.

651  
652 **Figure 2-Figure Supplement 5. Neutrophils robustly infiltrate the skin in the DNFB mouse**  
653 **model of atopic dermatitis. A.** Neutrophil count from ear skin of wild-type DNFB- and vehicle-  
654 treated mice 24 hours after challenge with DNFB or vehicle performed five days after initial  
655 DNFB sensitization on shaved rostral back skin (\*\* $p = 0.0004$ ; two-tailed t-test ( $t=4.290$ ;  $df$   
656  $=18$ ); n=10 mice per group). Values from bar plot is reported in **Figure 2-source data 6**.

657  
658 **Figure 2-source data 1.** Values displayed in bar plots shown in Figure 2A-D.

659 **Figure 2-source data 2.** Values displayed in the bar plots shown in Figure 2E and Figs. 2-  
660 Figure Supplement 2-3.

661 **Figure 2-source data 3.** Values displayed in the bar plots shown in Figure 2F-I and Figure 2-  
662 Figure Supplement 4A-B.

663 **Figure 2-source data 4.** Values used to generate the line plots shown in Figure 2-Figure  
664 Supplement 1C.

665 **Figure 2-source data 5.** Values displayed in the bar plots shown in Figure 2J-K.

666 **Figure 2-source data 6.** Values displayed in the bar plots in Figure 2-Figure Supplement 5A.

667 **Figure 3. The MC903 model induces rapid and robust changes in neuronal tissue. A.**  
668 Exact permutation test (10,000 iterations, see Methods) for significance of mean absolute log<sub>2</sub>  
669 fold change in gene expression at Day 8 (MC903 vs. ethanol) of custom-defined groups of  
670 genes for indicated categories (see **Figure 3-source data 1**). **B.** Log<sub>2</sub> fold change in gene  
671 expression (MC903 vs. ethanol) in mouse trigeminal ganglia (TG) at indicated time points for all  
672 genes which were significantly differentially expressed for at least one time point in the MC903  
673 model. Green bars = increased expression in MC903 relative to ethanol; magenta = decreased  
674 expression. Exact values and corrected *p*-values are reported in **Figure 3-source data 2** and  
675 **Supplemental Data**, respectively. **C.** Representative composite images showing immune cells  
676 (CD45, green), and sensory neurons (Prph, magenta) with DAPI (blue) in sectioned trigeminal  
677 ganglia from mice treated with Vehicle or MC903 for five days on the cheek. **D.** Quantification of  
678 images examining average number of CD45<sup>+</sup> cells per section and average ratio of  
679 CD45:Peripherin cells per section after five days of treatment (*p* = 0.562 (*t*=0.6318, *df*=4), 0.542  
680 (*t*=0.6660, *df*=4); two-tailed unpaired t-tests, *n*=33-159 fields of view (images) each of both  
681 trigeminal ganglia from 3 mice per condition treated bilaterally). **E.** Representative composite  
682 images showing immune cells (CD45, green), and sensory neurons (Peripherin (Prph),  
683 magenta) with DAPI (blue) in sectioned trigeminal ganglia from mice treated with Vehicle or  
684 MC903 for eight days on the cheek. **F.** Quantification of images examining average number of  
685 CD45<sup>+</sup> cells per section and average ratio of CD45:Peripherin cells per section after eight days  
686 of treatment (\*\**p* = 0.0019 (*t*=5.977, *df*=5), \*\**p* = 0.0093 (*t*=4.107, *df*=4); two-tailed unpaired t-  
687 tests; *n*=42-172 fields of view (images) each of both trigeminal ganglia from 3 EtOH or 4 MC903  
688 animals treated bilaterally). Scale bar = 100 μm. Images were acquired on a fluorescence  
689 microscope using a 10x air objective. Values from bar plots and all TG IHC data are available in  
690 **Figure 3-source data 3**. **G.** Log<sub>2</sub> fold change in gene expression (MC903 vs. ethanol) in mouse  
691 spinal cord on day 8 showing selected differentially expressed genes (*p*<sub>adjusted</sub> < 0.05). Exact  
692 values and corrected *p*-values are reported in **Supplemental Data**.

693  
694 **Figure 3-Figure Supplement 1. Method of image quantification for sectioned trigeminal**  
695 **ganglia. A.** Representative composite image showing CD45 (green), Peripherin (magenta), and  
696 DAPI (blue). **B.** Single-channel CD45 image with automated min/max intensity thresholding. **C.**  
697 Resultant binary image generated from **B**. **D.** Cells were counted as the number of regions of  
698 interest (ROIs) outlined in blue.

699  
700 **Figure 3-source data 1.** Values displayed in the bar plot shown in Figure 3A.

701 **Figure 3-source data 2.** Values displayed in the heat map shown in Figure 3B.

702 **Figure 3-source data 3.** Quantification of all IHC samples from trigeminal ganglia, and Values  
703 displayed in the bar plots shown in Figure 3D,F.



704 **Figure 4. Neutrophils are required for induction of the itch-inducing chemokine CXCL10.**  
705 **A.** Log<sub>2</sub> fold change (Day 8 MC903 vs. EtOH) of Th2 genes in skin from uninjected wild-type,  
706 aGr1-treated, and TSLPR<sup>-/-</sup> animals. **B.** Log<sub>2</sub> fold change (Day 8 MC903 vs. EtOH) of  
707 chemokine genes in skin from uninjected wild-type, aGr1-treated, and TSLPR<sup>-/-</sup> animals. **C.** Log<sub>2</sub>  
708 fold change (Day 8 MC903 vs. EtOH) of activity-induced genes in trigeminal ganglia from  
709 uninjected wild-type, aGr1-treated, and TSLPR<sup>-/-</sup> animals. **D.** Log<sub>2</sub> fold change (Day 8 MC903  
710 vs. EtOH) of *Lcn2* and activity-induced genes in spinal cord from uninjected and aGr1-treated  
711 wild-type mice on day 8. For **Figure 4A-D**, exact values and corrected *p*-values are reported in  
712 **Supplemental Data**. **E.** Quantification of innervation (see Methods) of MC903 and EtOH-  
713 treated mouse skin as determined from BTIII staining (*p* = 0.8985; two-tailed t-test (*t* = 0.1294; *df*  
714 = 18); *n* = 9,11 images each from 2 mice per treatment. Exact values are reported in **Figure 4-**  
715 **source data 1**. **F.** CXCL10 levels in skin homogenate as measured by ELISA on day 8 of the  
716 MC903 model for uninjected animals (left; \**p* = 0.029 (*t* = 2.715, *df* = 7); two-tailed t-test; *n* = 4,5  
717 animals), animals which received aGr1 for 8 days (middle; *p* = 0.43 (*t* = 0.815, *df* = 11); two-tailed  
718 t-test; *n* = 6,6 animals), and TSLPR<sup>-/-</sup> animals (right; \**p* = 0.0357 (*t* = 2.696, *df* = 6); two-tailed t-  
719 test; *n* = 4,4 animals. Skin homogenates were isolated on separate days and so uninjected, WT  
720 samples were not compared to aGr1-treated samples or to TSLPR<sup>-/-</sup> samples. **G.** (Left) Time  
721 spent scratching over a thirty minute interval on days 5, 8, and 12 of the MC903 model, one  
722 hour after mice were injected with either 3.31 mM of the CXCR3 antagonist AMG 487 or vehicle  
723 (20% HPCD in PBS; 50 μL s.c. in rostral back); (two-way ANOVA: \*\*\*\**p*<sub>treatment</sub> < 0.0001, *F*(1,67)  
724 = 50.64; Tukey's multiple comparisons: \**p*<sub>day 5</sub> = 0.0216, *n* = 8,10 mice; \*\*\**p*<sub>day 8</sub> = 0.0007, *n* = 18,21  
725 mice; \*\*\*\**p*<sub>day 12</sub> < 0.0001, *n* = 8,8 mice). (Right) Time spent scratching over a thirty minute interval  
726 one hour after mice were injected with either 3.31 mM of the CXCR3 antagonist AMG 487 or  
727 vehicle (20% HPCD in PBS; 50 μL s.c. in rostral back), and immediately after mice were  
728 injected with 50 mM chloroquine (20 μL i.d., cheek). *p* = 0.92 (*t* = 0.0964, *df* = 8); two-tailed t-test;  
729 *n* = 5,5 mice. Values from bar plots in **Figures 4F-G** are displayed in **Figure 4-source data 2**.

730  
731 **Figure 4-Figure Supplement 1. MC903-dependent gene expression changes in aGr1-**  
732 **treated and TSLPR<sup>-/-</sup> animals.** **A.** Heat map showing log<sub>2</sub> fold change in gene expression (Day  
733 8 MC903 vs. EtOH) for itch-associated genes in wild-type, aGr1-treated, and TSLPR<sup>-/-</sup> skin.  
734 Green bars = increased expression in MC903 relative to ethanol; magenta = decreased  
735 expression. Exact values and corrected *p*-values are reported in **Figure 4-source data 3** and  
736 **Supplemental Data**, respectively. **B.** Heat map showing log<sub>2</sub> fold change in gene expression  
737 (Day 8 MC903 vs. EtOH) for wild-type, aGr1-treated, and TSLPR<sup>-/-</sup> mouse trigeminal ganglia  
738 (TG) at indicated time points for all genes which were significantly differentially expressed for at  
739 least one time point in the MC903 model (See **Figure 2D**). Green bars = increased expression  
740 in MC903 relative to ethanol; magenta = decreased expression. Exact values and corrected *p*-  
741 values are reported in **Figure 4-source data 4** and **Supplemental Data**, respectively.

742  
743

744 **Figure 4-source data 1.** Values displayed in the bar plot shown in Figure 4E.

745 **Figure 4-source data 2.** Values displayed in the bar plots shown in Figure 4F-G.

746 **Figure 4-source data 3.** Values displayed in the heat map shown in Figure 4-Figure  
747 Supplement 1A.

748 **Figure 4-source data 4.** Values displayed in the heat map shown in Figure 4-Figure  
749 Supplement 1B.

750

751 **Figure 5. Model of early AD pathogenesis. A.** AD induction first results in increased protease  
752 expression and barrier dysfunction, which drives production of the cytokines TSLP and CXCL1  
753 via PAR2 activation within keratinocytes. CXCL1 can recruit neutrophils via its receptor CXCR2.  
754 Neutrophils may evoke itch by multiple pathways, including degranulation and release of  
755 proteases and histamine, production of sensitizing lipids such as PGE<sub>2</sub> and LTB<sub>4</sub>,<sup>52</sup> and  
756 induction of CXCL10 expression, which can activate sensory neurons via CXCR3. TSLP  
757 activates a number of immune cells to elicit IL-4 production, including basophils, which results in  
758 increased IL-4, recruitment of CD4<sup>+</sup> T cells,<sup>22</sup> and sensitization of neurons to promote itch later  
759 in the model.

760  
761 **Supplementary Data** - The outputs of all differential expression analyses used to determine  
762 adjusted *p* value and log<sub>2</sub> fold change for RNA-seq experiments.  
763

764 **Methods**

| <b>Key Resources Table</b>                                                                   |                                                                     |                            |                                                     |                                                                                  |
|----------------------------------------------------------------------------------------------|---------------------------------------------------------------------|----------------------------|-----------------------------------------------------|----------------------------------------------------------------------------------|
| <b>Reagent type (species) or resource</b>                                                    | <b>Designation</b>                                                  | <b>Source or reference</b> | <b>Identifiers</b>                                  | <b>Additional information</b>                                                    |
| strain, strain background(C57BL/6J)                                                          | C57BL/6; WT; wild-type                                              | The Jackson Laboratory     | Jackson Stock #: 000664; RRID:IMSR_JAX:000664       |                                                                                  |
| strain, strain background(C57BL/6NCrI)                                                       | C57BL/6; WT; wild-type                                              | Charles River Laboratories | RRID:IMSR_CRL:27; Charles River strain code #: 027; |                                                                                  |
| strain, strain background(Crlf2tm1Jni)                                                       | Crlf2tm1Jni; TSLPR KO                                               | PMID:14993294              | RRID:MGI:3039553; MGI Cat# 3039553                  | Obtained from the laboratory of Steven F. Ziegler (Ben Aroya Research Institute) |
| antibody(Purified anti-mouse Ly-6G/Gr-1 antibody. Low endotoxin, no azide, in PBS)           | anti-GR1 (RB6-8C5); aGr1                                            | UCSF Core                  | UCSF Core Cat# AM051                                | Obtained from the laboratory of Daniel Portnoy (UC Berkeley)                     |
| antibody(LEAF Purified anti-mouse Ly-6G/Ly-6C (Gr-1) antibody)                               | LEAF Purified anti-mouse Ly-6G/Ly-6C (Gr-1) antibody; RB6-8C5; aGr1 | Biolegend                  | RRID:AB_313379; BioLegend Cat# 108414               |                                                                                  |
| antibody (Rabbit polyclonal to $\beta$ -tubulin III)                                         | Rabbit anti- $\beta$ -tubulin III                                   | Abcam                      | RRID:AB_444319; Cat # ab18207                       |                                                                                  |
| antibody (Rabbit polyclonal to CGRP)                                                         | Rabbit anti-CGRP                                                    | Immunostar                 | RRID:AB_572217; Cat # 24112                         |                                                                                  |
| antibody(Chicken polyclonal to Peripherin)                                                   | Chicken anti-Peripherin                                             | Abcam                      | RRID:AB_777207; Cat # ab39374                       |                                                                                  |
| antibody(Goat Anti-Mouse IgG H&L Alexa Fluor 488)                                            | Goat anti-Mouse Alexa 488                                           | Abcam                      | RRID:AB_2688012; Cat # ab150117                     |                                                                                  |
| antibody(Goat anti-Chicken IgY (H+L) Secondary Antibody, Alexa Fluor 488)                    | Goat anti-Chicken Alexa 488                                         | ThermoFisher Scientific    | RRID:AB_2534096; Cat # A-11039                      |                                                                                  |
| antibody(Goat Anti-Chicken IgG (H+L) Secondary Antibody, Alexa Fluor 594)                    | Goat anti-Chicken Alexa 594                                         | ThermoFisher Scientific    | RRID:AB_2534099; Cat # A11042                       |                                                                                  |
| antibody(Goat anti-Rabbit IgG (H+L) Secondary Antibody, Alexa Fluor 594)                     | Goat anti-Rabbit Alexa 594                                          | Invitrogen                 | RRID:AB_2556545; Cat # R37117                       |                                                                                  |
| commercial assay or kit(Promocell Keratinocyte Growth Medium 2)                              | Promocell Keratinocyte Growth Medium 2                              | Promocell                  | Cat # C-20011                                       |                                                                                  |
| cell line(Normal Human Epidermal Keratinocytes (NHEK), single juvenile donor, cryopreserved) | Normal Human Epidermal Keratinocytes (NHEK)                         | Promocell                  | Cat # C-12001                                       |                                                                                  |
| other(Liberase TM Research Grade)                                                            | Liberase                                                            | Roche                      | Cat # 5401119001                                    |                                                                                  |
| other(Dnase I from bovine pancreas)                                                          | Dnase I                                                             | Sigma                      | Cat # 11284932001                                   |                                                                                  |

|                                                                                |                                                                                                                                       |                    |                                 |  |
|--------------------------------------------------------------------------------|---------------------------------------------------------------------------------------------------------------------------------------|--------------------|---------------------------------|--|
| other(Ambion™ DNase I (RNase-free))                                            | Ambion® DNase I (RNase-free); DNase                                                                                                   | Ambion             | Cat # AM2222                    |  |
| peptide, recombinant protein(SLIGRL-NH2)                                       | SLIGRL                                                                                                                                | Tocris             | Cas 171436-38-7 ;<br>Cat #1468  |  |
| commercial assay or kit(RNeasy mini kit)                                       | Qiagen RNeasy mini kit                                                                                                                | Qiagen             | Cat # 74104                     |  |
| commercial assay or kit(RNAzol RT)                                             | RNAzol                                                                                                                                | Sigma-Aldrich      | Cat # R4533-50ML                |  |
| chemical compound, drug((2-Hydroxypropyl)-β-cyclodextrin)                      | HPCD                                                                                                                                  | Sigma-Aldrich      | Cas 128446-35-5;<br>Cat # H107  |  |
| chemical compound, drug(Methyl alcohol)                                        | Methanol; MeOH                                                                                                                        | Sigma-Aldrich      | Cas 67-56-1; Cat #<br>34860     |  |
| chemical compound, drug(Ethyl alcohol)                                         | Ethanol, Absolute (200 Proof), Molecular Biology Grade, Fisher BioReagents™; Absolute Ethanol, Molecular-Biology grade; Ethanol; EtOH | Fischer Scientific | Cas 64-17-5; Cat #<br>BP2818100 |  |
| chemical compound, drug(Calcipotriol)                                          | MC903; Calcipotriol                                                                                                                   | Tocris             | Cas 112965-21-6;<br>Cat # 2700  |  |
| chemical compound, drug((±)-AMG 487)                                           | AMG-487; AMG                                                                                                                          | Tocris             | Cas 947536-03-0;<br>Cat # 4487  |  |
| chemical compound, drug(Chloroquine diphosphate)                               | Chloroquine                                                                                                                           | Sigma-Aldrich      | CAS 50-63-5; Cat #<br>C6628     |  |
| chemical compound, drug(Dimethyl sulfoxide)                                    | DMSO                                                                                                                                  | Sigma-Aldrich      | Cat # 8418-100mL                |  |
| chemical compound, drug(Formaldehyde, 16%, methanol free, Ultra Pure)          | Paraformaldehyde; PFA                                                                                                                 | Polysciences, Inc. | Cat # 18814-10                  |  |
| chemical compound, drug(Tissue Tek Optimal cutting temperature compound (OCT)) | OCT                                                                                                                                   | Sakura Finetek USA | Cat # 4583                      |  |
| chemical compound, drug(Triton X-100 solution)                                 | Triton X-100                                                                                                                          | BioUltra           | CAS 9002-93-1; Cat #<br>93443   |  |
| chemical compound, drug(Phosphate-buffered saline (PBS), pH 7.4)               | PBS                                                                                                                                   | Gibco              | Cat # 10010023                  |  |
| chemical compound, drug(Benzyl benzoate)                                       | Benzyl benzoate                                                                                                                       | Sigma-Aldrich      | CAS 120-51-4; Cat #<br>B6630    |  |
| chemical compound, drug(Benzyl alcohol)                                        | Benzyl alcohol                                                                                                                        | Sigma-Aldrich      | CAS 100-51-6; Cat #<br>305197   |  |

|                                                                                             |                                                           |                         |                                  |
|---------------------------------------------------------------------------------------------|-----------------------------------------------------------|-------------------------|----------------------------------|
| chemical compound, drug(Sucrose)                                                            | Sucrose                                                   | Sigma-Aldrich           | CAS 57-50-1; Cat # S0389         |
| chemical compound, drug(LIVE/DEAD Fixable Aqua Dead Cell Stain Kit, for 405 nm excitation)  | Aqua                                                      | ThermoFisher Scientific | Cat # L34957                     |
| chemical compound, drug(Isoflurane, USP)                                                    | Isoflurane                                                | Piramal                 | CAS 26675-46-7                   |
| chemical compound, drug(4',6-Diamidino-2-Phenylindole, Dihydrochloride)                     | DAPI                                                      | ThermoFisher Scientific | CAS 28718-90-3; Cat # 1306       |
| chemical compound, drug(4',6-Diamidino-2-Phenylindole, Dihydrochloride)                     | DAPI LIVE/DEAD                                            | Invitrogen              | Cat # L34961                     |
| chemical compound, drug(Fluoromount-G)                                                      | Fluoromount-G                                             | ThermoFisher Scientific | Cat # 00-4958-02                 |
| antibody(Goat Anti-Mouse IgG - H&L - Fab Fragment Polyclonal Antibody, Unconjugated, Abcam) | F(ab) anti-mouse IgG                                      | Abcam                   | RRID:AB_955960; Cat # ab6668     |
| antibody(Anti-Mouse CD45.2 Purified 100 ug antibody, Thermo Fisher Scientific)              | Mouse anti-CD45.2                                         | eBioscience             | RRID:AB_467261; Cat # 14-0454-82 |
| antibody(Purified anti-mouse CD16/32 antibody. Low endotoxin, no azide, in PBS)             | Rat anti-Mouse CD16/32 (2.4G2)                            | UCSF Core               | UCSF Core Cat# AM004             |
| commercial assay or kit(DuoSet ELISA Ancillary Reagent Kit 2)                               | DuoSet ELISA Ancillary Reagent Kit 2                      | R&D Systems             | Cat # DY008                      |
| commercial assay or kit(Mouse CXCL10 DuoSet ELISA)                                          | Mouse CXCL10 DuoSet ELISA                                 | R&D Systems             | Cat # DY466                      |
| commercial assay or kit(Pierce™ BCA Protein Assay Kit - Reducing Agent Compatible)          | Pierce™ BCA Protein Assay Kit - Reducing Agent Compatible | ThermoFisher Scientific | Cat # 23250                      |
| chemical compound, drug(2-Amino-2-(hydroxymethyl)-1,3-propanediol)                          | Trizma base, TRIS, TRIS base                              | Sigma-Aldrich           | Cas 77-86-1 ; Cat # T4661        |
| chemical compound, drug(Ethylene glycol-bis(2-aminoethylether)-N,N,N',N'-tetraacetic acid)  | EGTA                                                      | Sigma-Aldrich           | Cas 67-42-5 ; Cat # E3889        |
| chemical compound, drug((Ethylenedinitrilo)tetraacetic acid)                                | EDTA                                                      | Sigma-Aldrich           | Cas 60-00-4 ; Cat # E9884        |
| commercial assay or kit(PhosSTOP)                                                           | PhosSTOP inhibitor                                        | Roche                   | Cat # 4906845001                 |
| chemical compound, drug(Sodium deoxycholate, ≥97% (titration))                              | Sodium deoxycholate                                       | Sigma-Aldrich           | Cas 302-95-4; Cat # D6750        |

|                                                                                                        |                                        |                   |                                   |
|--------------------------------------------------------------------------------------------------------|----------------------------------------|-------------------|-----------------------------------|
| chemical compound, drug(Phenylmethylsulfonyl fluoride)                                                 | PMSF                                   | Sigma-Aldrich     | Cas 329-98-6; Cat # 10837091001   |
| chemical compound, drug(1-Fluoro-2,4,-dinitrobenzene)                                                  | DNFB                                   | Sigma             | Cas 70-34-8; Cat # D1529          |
| commercial assay or kit(cOComplete protease inhibitor cocktail)                                        | cOComplete protease inhibitor cocktail | Roche             | Cat # 11697498001                 |
| other(Advanced RPMI Medium 1640)                                                                       | RPMI                                   | Gibco             | Cat # 12633012                    |
| other(Fetal Bovine Serum)                                                                              | Fetal Bovine Serum; FBS; FCS           | HyClone           | Cat # 30396.03                    |
| other(Sodium pyruvate 100 mM)                                                                          | sodium pyruvate 100 mM                 | Gibco             | Cat # 11360070                    |
| other(HEPES (N-2-hydroxyethylpiperazine-N-2-ethane sulfonic acid) 1M)                                  | HEPES 1M                               | Gibco             | Cat # 15630080                    |
| other(L-Glutamine 200 mM)                                                                              | L-Glutamine 200 mM                     | Gibco             | Cat # 25030081                    |
| other(Penicillin-Streptomycin (10,000 U/mL))                                                           | Pen-Strep                              | Gibco             | Cat # 15140122                    |
| other(Collagenase VIII)                                                                                | Collagenase VIII                       | Sigma-Aldrich     | Cat # C2139-500MG                 |
| commercial assay or kit(Invitrogen™ CountBright™ Absolute Counting Beads, for flow cytometry)          | Counting Beads                         | Invitrogen        | Cat # C36950                      |
| antibody(CD45 Monoclonal Antibody (30-F11), APC-eFluor 780, eBioscience(TM), Thermo Fisher Scientific) | CD45-APC/eFluor 780 (30-F11)           | eBioscience       | RRID:AB_1548781; Cat # 47-0451-82 |
| antibody(CD11b Monoclonal Antibody (M1/70), PE-Cyanine7, eBioscience(TM), Thermo Fisher Scientific)    | CD11b-PE/Cy7 (M1/70)                   | BD Biosciences    | RRID:AB_469588; Cat # 25-0112-82  |
| antibody(PE-Cyanine7 Anti-Human/Mouse CD45R (B220) (RA3-6B2) Antibody, Tonbo Biosciences)              | B220-PE/Cy7 (RA3-6B2)                  | Tonbo Biosciences | RRID:AB_2621849; Cat # 60-0452    |
| antibody(CD11c Monoclonal Antibody (N418), PE-Cyanine7, eBioscience(TM), Thermo Fisher Scientific)     | CD11c-PE/Cy7 (N418)                    | eBioscience       | RRID:AB_469590; Cat # 25-0114-82  |
| antibody(CD3e Monoclonal Antibody (145-2C11), FITC, eBioscience(TM), Thermo Fisher Scientific)         | CD3-FITC (145-2C11)                    | eBioscience       | RRID:AB_464882; Cat # 11-0031-82  |
| antibody(Brilliant Violet 785™ anti-mouse CD8a antibody, BioLegend)                                    | CD8-BV785 (53-6.7)                     | Biolegend         | RRID:AB_1121880; Cat # 100749     |

|                                                                                                   |                                |                                         |                                                                                                                                       |
|---------------------------------------------------------------------------------------------------|--------------------------------|-----------------------------------------|---------------------------------------------------------------------------------------------------------------------------------------|
| antibody(Rat Anti-CD4 Monoclonal Antibody, Phycoerythrin Conjugated, Clone GK1.5, BD Biosciences) | CD4-PE (GK1.5)                 | BD Biosciences                          | RRID:AB_395014;<br>Cat # 553730                                                                                                       |
| antibody(Alexa Fluor® 647 anti-mouse TCR $\gamma/\delta$ Antibody)                                | gdTCR-AF647 (GL3)              | Biolegend                               | RRID:AB_313826;<br>Cat # 118133                                                                                                       |
| antibody(CD117 (c-Kit) Monoclonal Antibody (2B8), Biotin)                                         | c-Kit-Biotin (ACK2)            | eBioscience                             | RRID:AB_466569;<br>Cat # 13-1171-82                                                                                                   |
| antibody(FcεR1 alpha Monoclonal Antibody (MAR-1), PE, eBioscience)                                | FcεR1-PE (MAR-1)               | eBioscience                             | RRID:AB_466028;<br>Cat # 12-5898-82                                                                                                   |
| antibody(CD49b (Integrin alpha 2) Monoclonal Antibody (DX5), PE-Cyanine7, eBioscience)            | CD49b-PE/Cy7 (DX5)             | eBioscience                             | RRID:AB_469667;<br>Cat # 25-5971-82                                                                                                   |
| antibody(Anti-Siglec-F-APC, mouse (clone: REA798))                                                | SiglecF-APC                    | Miltenyi Biotec                         | RRID:AB_2653441;<br>Cat # 130-112-333                                                                                                 |
| antibody(Streptavidin FITC)                                                                       | SA-FITC                        | eBioscience                             | RRID:AB_11431787<br>; Cat # 11-4317-87                                                                                                |
| antibody(Ly-6C Monoclonal Antibody (HK1.4), PerCP-Cyanine5.5, eBioscience)                        | Ly6C-PerCP/Cy5.5 (HK1.4)       | eBioscience                             | RRID:AB_1518762;<br>Cat # 45-5932-82                                                                                                  |
| antibody(violetFluor™ 450 Anti-Human/Mouse CD11b (M1/70))                                         | CD11b-violet fluor 450 (M1/70) | Tonbo Biosciences                       | RRID:AB_2621936;<br>Cat # 75-0112                                                                                                     |
| antibody(AF700 anti-mouse Ly-6G Antibody (1A8))                                                   | Ly6G-AF700 (1A8)               | BioLegend                               | RRID:AB_1064045;<br>Cat # 127621                                                                                                      |
| antibody(CD45.2 Monoclonal Antibody (104), APC-Cy7, eBioscience)                                  | CD45.2-APC/Cy7 (104)           | eBioscience                             | RRID:AB_1272175;<br>Cat # 47-0454-82                                                                                                  |
| software, algorithm(Igor Pro version 6.3)                                                         | IgorPro                        | WaveMetrics                             | <a href="https://www.wavemetrics.com/order/order_igordownloads6.htm">https://www.wavemetrics.com/order/order_igordownloads6.htm</a>   |
| software, algorithm(Microsoft Excel 2011)                                                         | Microsoft Excel                | Microsoft                               | <a href="https://www.microsoft.com/en-us/store/d/excel-2016-for-mac/">https://www.microsoft.com/en-us/store/d/excel-2016-for-mac/</a> |
| software, algorithm(FIJI)                                                                         | FIJI                           | NIH                                     | <a href="https://imagej.net/Fiji/Downloads">https://imagej.net/Fiji/Downloads</a>                                                     |
| software, algorithm(Graphpad Prism 7)                                                             | Graphpad Prism                 | Graphpad                                | <a href="https://www.graphpad.com/scientific-software/prism/">https://www.graphpad.com/scientific-software/prism/</a>                 |
| software, algorithm(R-3.6.0)                                                                      | R                              | The R Project for Statistical Computing | <a href="https://cran.r-project.org/bin/macosx/">https://cran.r-project.org/bin/macosx/</a>                                           |
| software, algorithm(Anaconda Python 2.7 version)                                                  | Python                         | Anaconda                                | <a href="https://www.anaconda.com/distribution/">https://www.anaconda.com/distribution/</a>                                           |

|                                                                  |                 |                                |                                                                                                                                             |
|------------------------------------------------------------------|-----------------|--------------------------------|---------------------------------------------------------------------------------------------------------------------------------------------|
| software, algorithm(HTSeq 0.11.1)                                | HTSeq           | Python Package Index           | <a href="https://htseq.readthedocs.io/en/release_0.11.1/install.html">https://htseq.readthedocs.io/en/release_0.11.1/install.html</a>       |
| software, algorithm(Trimmomatic)                                 | Trimmomatic     | PMID: 24695404                 | <a href="https://github.com/timflutre/trimmomatic">https://github.com/timflutre/trimmomatic</a>                                             |
| software, algorithm(Tophat 2.1.1)                                | Tophat          | PMID: 19289445                 | <a href="https://ccb.jhu.edu/software/tophat/">https://ccb.jhu.edu/software/tophat/</a>                                                     |
| software, algorithm(EdgeR)                                       | EdgeR           | PMID: 19910308; PMID: 22287627 | <a href="https://bioconductor.org/packages/release/bioc/html/edgeR.html">https://bioconductor.org/packages/release/bioc/html/edgeR.html</a> |
| software, algorithm(DESeq)                                       | DESeq           | PMID: 20979621                 | <a href="https://bioconductor.org/packages/release/bioc/html/DESeq.html">https://bioconductor.org/packages/release/bioc/html/DESeq.html</a> |
| software, algorithm(FlowJo 10.4.2)                               | FlowJo          | FlowJo                         | <a href="https://www.flowjo.com/solutions/flowjo/downloads">https://www.flowjo.com/solutions/flowjo/downloads</a>                           |
| other(Bovine serum albumin, cold ethanol fraction, pH 5.2, ≥96%) | BSA             | Sigma-Aldrich                  | CAS 9048-46-8; Cat # A4503                                                                                                                  |
| other(Normal Goat Serum)                                         | NGS; Goat serum | Abcam                          | Cat # ab7481                                                                                                                                |

765

#### 766 *Mouse studies*

767 All mice were housed in standard conditions in accordance with standards approved by the  
 768 Animal Care and Use Committee of the University of California Berkeley (12 hr light-dark cycle,  
 769 21°C). Wild-type C57BL/6 mice were obtained from Charles River or Jackson Laboratories and  
 770 raised in-house. TSLPR<sup>-/-</sup> mice were kindly provided by Dr. Steven Ziegler (*Cr1f2<sup>tm1.Jn159</sup>*) and  
 771 backcrossed onto C57BL/6. All experiments were performed under the policies and  
 772 recommendations of the International Association for the Study of Pain and approved by the  
 773 University of California Berkeley Animal Care and Use Committee. Where appropriate,  
 774 genotypes were assessed using standard PCR.

775

#### 776 *MC903 model of atopic dermatitis*

777 MC903 (Calcipotriol; R&D Systems) was applied to the shaved mouse cheek (20 µl of 0.2 mM in  
 778 ethanol) or rostral back (40 µl of 0.2 mM in ethanol) once per day for 1-12 days using a pipette.  
 779 100% ethanol was used. All MC903 studies were performed on 8-12 week old age-matched  
 780 mice. Behavior, RNA-seq, flow cytometry, and immunohistochemistry were performed on days  
 781 1, 2, 3, 5, 8 and/or 12. For AMG 487 experiments in the MC903 model, 50 µL 3.31 mM AMG  
 782 487 (Tocris) or 20% HPCD-PBS vehicle was injected subcutaneously one hour prior to  
 783 recording behavior.<sup>75</sup> Spontaneous scratching was manually scored for the first 30 minutes of  
 784 observation. Both bout number and length were recorded. Behavioral scoring was performed  
 785 while blind to experimental condition and mouse genotype.

786

#### 787 *MC903 RNA isolation and sequencing*

788 On days 1 (six hours post-treatment), 2, 5, or 8 post-treatment, mice treated with MC903 and  
 789 vehicle were euthanized via isoflurane and cervical dislocation. Cheek skin was removed, flash-  
 790 frozen in liquid nitrogen, and cryo-homogenized with a mortar and pestle. Ipsilateral trigeminal  
 791 ganglia were dissected and both skin and trigeminal ganglia were homogenized for three



792 minutes (skin) or one minute (TG) in 1 mL RNazol RT (Sigma-Aldrich). Thoracic spinal cord was  
793 dissected from mice treated with 40  $\mu$ L MC903 or ethanol on the shaved rostral back skin and  
794 homogenized for one minute in 1 mL RNazol. Large RNA was extracted using RNazol RT per  
795 manufacturer's instructions. RNA pellets were DNase treated (Ambion), resuspended in 50  $\mu$ L  
796 DEPC-treated water, and subjected to poly(A) selection and RNA-seq library preparation (Apollo  
797 324) at the Functional Genomics Laboratory (UC Berkeley). Single-end read sequencing (length  
798 = 50 bp) was performed by the QB3 Vincent G. Coates Genomic Sequencing Laboratory (UC  
799 Berkeley) on an Illumina HiSeq4000. See **Supplementary Table 1** for number of mice per  
800 experimental condition and number of mapped reads per sample. Data are available at Gene  
801 Expression Omnibus under GSE132173.

802

#### 803 *MC903 RNA sequencing analysis*

804 Reads were mapped to the mm10 mouse genome using Bowtie2 and Tophat, and reads were  
805 assigned to transcripts using htseq-count.<sup>113,114</sup> For a given time point, replicate measurements  
806 for each gene from treated and control mice were used as input for DESeq (R) and genes with  
807  $p_{\text{adjusted}} < 0.05$  (for skin and spinal cord) or  $p_{\text{adjusted}} < 0.1$  (for trigeminal ganglia) for at least one  
808 time point were retained for analysis.<sup>115,116</sup> For the skin dataset, we collated a set of AD-related  
809 immune cell markers, cytokines, atopic dermatitis disease genes, neurite outgrowth/axonal  
810 guidance genes, and locally expressed neuronal transcripts, and from this list visualized genes  
811 that were significantly differentially expressed for at least one time point. For the trigeminal  
812 ganglia dataset, we plotted all genes that were significantly differentially expressed for at least  
813 one time point. Genes from these lists were plotted with hierarchical clustering using heatmap2  
814 (R).

815

#### 816 *Custom gene groups*

817 Genes were clustered into functional groups and significance was evaluated using a  
818 permutation test. Briefly, we first tabulated the absolute value of the  $\log_2$  fold change of gene  
819 expression (between MC903 and EtOH) of each gene in a given group of  $n$  genes in turn, and  
820 then we calculated the median of these fold change values,  $z_{\text{true}}$ . We then drew  $n$  random genes  
821 from the set of all genes detected in the samples and computed the median  $\log_2$  fold change as  
822 above using this null set,  $z_{\text{null}}$ . Repeating the latter 10,000 times established a null distribution of  
823 median  $\log_2$  fold change values; we took the proportion of resampled gene groups that exhibited  
824 ( $z_{\text{true}} \geq z_{\text{null}}$ ) as an empirical  $p$ -value reporting the significance of changes in gene expression for  
825 a given group of  $n$  genes.

826

#### 827 *Flow Cytometry*

828 Skin samples were collected from the cheek of mice at the indicated time points with a 4- or 6-  
829 mm biopsy punch into cold RPMI 1640 medium (RPMI; Gibco) and minced into smaller pieces  
830 with surgical scissors. When ear skin was collected, whole ears were dissected postmortem into  
831 cold RPMI and finely minced with scissors. For isolation of immune cells, skin samples were  
832 digested for 1h at 37°C using 1 U/mL Liberase TM (Roche) and 5  $\mu$ g/mL DNase I (Sigma). At  
833 the end of the digestion, samples were washed in FACS buffer (PBS with 0.5% FCS and 2 mM  
834 EDTA) and filtered through a 70 or 100  $\mu$ m strainer (Falcon). Cells were stained with  
835 LIVE/DEAD fixable stain Aqua in PBS (Invitrogen), then blocked with anti-CD16/32 (UCSF  
836 Core) and stained with the following fluorophore-conjugated antibodies (all from eBiosciences  
837 unless stated otherwise) in FACS buffer: cKit-Biotin (clone ACK2; secondary stain with SA-  
838 FITC), CD11b-violet fluor 450 (Tonbo; clone M1/70), Ly6C-PerCP/Cy5.5 (clone HK1.4), CD49b-  
839 PE/Cy7 (clone DX5), CD45.2-APC/Cy7 (clone 104), Fc $\epsilon$ RI-PE (MAR-1), Ly6G-AF700 (clone  
840 1A8). 10  $\mu$ L of counting beads (Invitrogen) were added after the last wash to measure absolute  
841 cell counts. For measurement of CD4<sup>+</sup> T cells, 6-mm skin biopsy punch samples were digested  
842 for 30 minutes at 37°C using Collagenase VIII (Sigma). At the end of the digestion, cells were

843 washed in RPMI buffer (RPMI with: 5% FCS, 1% penicillin-streptomycin, 2 mM L-glutamine, 10  
844 mM HEPES buffer, 1 mM sodium pyruvate). Cells were blocked with anti-CD16/32 (UCSF Core)  
845 and stained with the following fluorophore-conjugated antibodies in FACS buffer (PBS with 5%  
846 FCS and 2 mM EDTA): CD45-APC-eFluor780 (clone 30-F11; eBiosciences), CD11b-PE/Cy7  
847 (clone M1/70; BD Biosciences), B220-PE/Cy7 (clone RA3-6B2; Tonbo Biosciences), CD11c-  
848 PE/Cy7 (clone N418; eBiosciences), CD3-FITC (clone 145-2C11; eBiosciences), CD8-BV785  
849 (clone 53-6.7; Biolegend), CD4-PE (clone GK1.5; BD Biosciences), gdTCR-AF647 (clone GL3;  
850 Biolegend). 10  $\mu$ L of counting beads (Invitrogen) were added after the last wash to measure  
851 absolute cell counts, and samples were resuspended in DAPI LIVE/DEAD (Invitrogen). Blood  
852 samples were collected from saphenous vein or from terminal bleed following decapitation. Red  
853 blood cells were lysed using ACK lysis buffer (Gibco), and samples were washed with FACS  
854 buffer (PBS with 0.5% FCS and 2 mM EDTA), and blocked with anti-CD16/32. Cells were  
855 stained with Ly6G-PE (1A8; BD Biosciences), CD11b-violet fluor 450 (M1/70, Tonbo), Ly6C-  
856 PerCP/Cy5.5 (HK1.4, Biolegend), and aGr1-APC/Cy7 (RB6-8C5, eBiosciences). For all  
857 experiments, single cell suspensions were analyzed on an LSR II or LSR Fortessa (BD  
858 Biosciences), and data were analyzed using FlowJo (TreeStar, v.9.9.3) software.

859

#### 860 *Human keratinocyte RNA sequencing*

861 Normal human epidermal keratinocytes from juvenile skin (PromoCell #C-12001) were cultured  
862 in PromoCell Keratinocyte Growth Medium 2 and passaged fewer than 5 times. Cells were  
863 treated for three hours at room temperature with 100  $\mu$ M SLIGRL or vehicle (Ringer's + 0.1%  
864 DMSO). Total RNA was extracted by column purification (Qiagen RNeasy Mini Kit). RNA was  
865 sent to the Vincent J. Coates Sequencing Laboratory at UC Berkeley for standard library  
866 preparation and sequenced on an Illumina HiSeq2500 or 4000. Sequences were trimmed  
867 (Trimmomatic), mapped (hg19, TopHat) and assigned to transcripts using htseq-count.  
868 Differential gene expression was assessed using R (edgeR). Data are available at Gene  
869 Expression Omnibus under GSE132174.

870

#### 871 *IHC of whole-mount skin*

872 Staining was performed as previously described.<sup>117,118</sup> Briefly, 8-week old mice were euthanized  
873 and the cheek skin was shaved. The removed skin was fixed overnight in 4% PFA, then washed  
874 in PBS (3X for 10 min each). Dermal fat was scraped away with a scalpel and skin was washed  
875 in PBST (0.3% Triton X-100; 3X for two hours each) then incubated in 1:500 primary antibody  
876 (Rabbit anti beta-Tubulin II; Abcam #ab18207 or Rabbit anti-CGRP; Immunostar #24112) in  
877 blocking buffer (PBST with 5% goat serum and 20% DMSO) for 6 days at 4°C. Skin was  
878 washed as before and incubated in 1:500 secondary antibody (Goat anti-Rabbit Alexa 594;  
879 Invitrogen #R37117) in blocking buffer for 3 days at 4°C. Skin was washed in PBST, serially  
880 dried in methanol: PBS solutions, incubated overnight in 100% methanol, and finally cleared  
881 with a 1:2 solution of benzyl alcohol: benzyl benzoate (BABB; Sigma) before mounting between  
882 No. 1.5 coverglass. Whole mount skin samples were imaged on a Zeiss LSM 880 confocal  
883 microscope with OPO using a 20x water objective. Image analysis was performed using a  
884 custom macro in FIJI. Briefly, maximum intensity z-projections of the beta-tubulin III or CGRP  
885 channel were converted to binary files that underwent edge-detection analysis. Regions were  
886 defined by circling all stained regions. Region sizes and locations were saved.

887

#### 888 *IHC of sectioned trigeminal ganglia*

889 TG were dissected from 8- to 12-week old adult mice and post-fixed in 4% PFA for one hour.  
890 TG were cryo-protected overnight at 4°C in 30% sucrose-PBS, embedded in OCT, and then  
891 cryosectioned at 14  $\mu$ m onto slides for staining. Slides were washed 3x in PBST (0.3% Triton X-  
892 100), blocked in 2.5% Normal Goat serum + 2.5% BSA-PBST, washed 3X in PBST, blocked in  
893 endogenous IgG block (1:10 F(ab) anti-mouse IgG (Abcam ab6668) + 1:1000 Rat anti-mouse

894 CD16/CD32 (UCSF MAB Core) in 0.3% PBST), washed 3X in PBST and incubated overnight at  
895 4°C in 1:1000 primary antibody in PBST + 0.5% Normal Goat Serum + 0.5% BSA. Slides were  
896 washed 3x in PBS, incubated 2 hr at RT in 1:1000 secondary antibody, washed 3X in PBS, and  
897 then incubated 30 min in 1:2000 DAPI-PBS. Slides were washed 3x in PBS and mounted in  
898 Fluoromount-G with No. 1.5 coverglass. Primary antibodies used: Mouse anti-CD45  
899 (eBioscience #14-054-82) and Chicken anti-Peripherin (Abcam #39374). Secondary antibodies  
900 used: Goat anti-Chicken Alexa 594 (ThermoFisher #A11042) and Goat anti-Mouse Alexa 488  
901 (Abcam #150117). DAPI (ThermoFisher #D1306) was also used to mark nuclei. Imaging of TG  
902 IHC experiments was performed on an Olympus IX71 microscope with a Lambda LS-xl light  
903 source (Sutter Instruments). For TG IHC analysis, images were analyzed using automated  
904 scripts in FIJI (ImageJ) software. Briefly, images were separated into the DAPI, CD45, and  
905 Peripherin channels. The minimum/maximum intensity thresholds were batch-adjusted to pre-  
906 determined levels, and adjusted images were converted to binary files. Regions were defined by  
907 circling all stained regions with pre-determined size-criteria. Region sizes and locations were  
908 saved. All scripts are available upon request.

909

#### 910 *Neutrophil depletion*

911 Neutrophils were acutely depleted using intraperitoneal injection with 250 µg aGR1 in PBS  
912 (clone RB6-8C5, a gift from D. Portnoy, UC Berkeley, or from Biologend), 16-24 hours before  
913 behavioral and flow cytometry experiments. Depletion was verified using flow cytometry on  
914 blood collected from terminal bleed following decapitation. For longer depletion experiments  
915 using the MC903 model, mice were injected (with 250 µg aGR1 in PBS or PBS vehicle, i.p.)  
916 beginning one day prior to MC903 administration and each afternoon thereafter through day 7 of  
917 the model, or on days 8-11 for measurement of day 12 itch behaviors, and blood was collected  
918 via saphenous venipuncture at days 3, 5, or by decapitation at day 8 to verify depletion.

919

#### 920 *CXCL10 ELISA measurements in skin*

921 Neutrophil-depleted or uninjected mice were treated with MC903 or ethanol for 7 days. On day  
922 8, 6-mm biopsy punches of cheek skin were harvested, flash-frozen in liquid nitrogen, cryo-  
923 homogenized by mortar and pestle, and homogenized on ice for three minutes at maximum  
924 speed in 0.5 mL of the following tissue homogenization buffer (all reagents from Sigma unless  
925 stated otherwise): 100 mM Tris, pH 7.4; 150 mM NaCl, 1 mM EGTA, 1 mM EDTA, 1% Triton X-  
926 100, and 0.5% Sodium deoxycholate in ddH<sub>2</sub>O; on the day of the experiment, 200 mM fresh  
927 PMSF in 100% ethanol was added to 1mM, with 1 tablet cOmplete protease inhibitor (Roche)  
928 per 50 mL, and 5 tablets PhosSTOP inhibitor (Roche) per 50 mL buffer. Tissues were agitated  
929 in buffer for two hours at 4°C, and centrifuged at 13,000 rpm for 20 minutes at 4°C.  
930 Supernatants were aliquoted and stored at -80°C for up to one week. After thawing, samples  
931 were centrifuged at 10,000 rpm for five minutes at 4°C. Protein content of skin homogenates  
932 was quantified by BCA (Thermo Scientific) and homogenates were diluted to 2 mg/mL protein in  
933 PBS and were subsequently diluted 1:2 in Reagent Diluent (R&D Systems). CXCL10 protein  
934 was quantified using the Mouse CXCL10 DuoSet ELISA kit (R&D Systems; #DY466-05)  
935 according to manufacturer's instructions. Plate was read at 450 nm and CXCL10 was quantified  
936 using a seven-point standard curve (with blank and buffer controls) and fitted with a 4-parameter  
937 logistic curve.

938

#### 939 *Acute itch behavior*

940 Itch behavioral measurements were performed as previously described.<sup>56,119,120</sup> Mice were  
941 shaved one week prior to itch behavior and acclimated in behavior chambers once for thirty  
942 minutes at the same time of day on the day prior to the experiment. Behavioral experiments  
943 were performed during the day. Compounds injected: 1 µg carrier-free CXCL1 (R&D systems) in  
944 PBS, 3.31 mM AMG 487 (Tocris, prepared from 100 mM DMSO stock) in 20% HPCD-PBS, 50

945 mM Chloroquine diphosphate (Sigma) in PBS, along with corresponding vehicle controls. Acute  
946 pruritogens were injected using the cheek model (20  $\mu$ L, subcutaneous/s.c.) of itch, as  
947 previously described.<sup>56</sup> AMG 487 (50  $\mu$ L) or vehicle was injected s.c. into the rostral back skin  
948 one hour prior to recording of behavior. Behavioral scoring was performed as described above.

949

#### 950 *Lipidomics*

951 Skin was collected from the cheek of mice post-mortem with a 6-mm biopsy punch and  
952 immediately flash-frozen in liquid nitrogen. Lipid mediators and metabolites were quantified via  
953 liquid chromatography-tandem mass spectrometry (LC-MS/MS) as described before.<sup>121</sup> In brief,  
954 skin was homogenized in cold methanol to stabilize lipid mediators. Deuterated internal  
955 standards (PGE<sub>2</sub>-d4, LTB<sub>4</sub>-d4, 15-HETE-d8, LXA<sub>4</sub>-d5, DHA-d5, AA-d8) were added to samples  
956 to calculate extraction recovery. LC-MS/MS system consisted of an Agilent 1200 Series HPLC,  
957 Luna C18 column (Phenomenex, Torrance, CA, USA), and AB Sciex QTRAP 4500 mass  
958 spectrometer. Analysis was carried out in negative ion mode, and lipid 30 mediators quantified  
959 using scheduled multiple reaction monitoring (MRM) mode using four to six specific transition  
960 ions per analyte.<sup>122</sup>

961

#### 962 *1-Fluoro-2,4-dinitrobenzene (DNFB) model of atopic dermatitis*

963 The DNFB model was conducted as described previously.<sup>63</sup> Briefly, the rostral backs of  
964 isoflurane-anesthetized mice were shaved using surgical clippers. Two days after shaving,  
965 mice were treated with 25  $\mu$ L 0.5% DNFB (Sigma) dissolved in 4:1 acetone:olive oil vehicle on  
966 the rostral back using a pipette. Five days after the initial DNFB sensitization, mice were  
967 challenged with 40  $\mu$ L 0.2% DNFB or 4:1 acetone:olive oil vehicle applied to the outer surface of  
968 the right ear. Twenty-four hours after DNFB or vehicle challenge, mice were euthanized and ear  
969 skin was harvested for flow cytometry.

970

#### 971 *Statistical analyses*

972 Different control experimental conditions (e.g. uninjected versus PBS-injected animals) were  
973 pooled when the appropriate statistical test showed they were not significantly different  
974 (Supplementary Table 2). For all experiments except RNA-seq (see above), the following  
975 statistical tests were used, where appropriate: Student's t-test, one-way ANOVA with Tukey-  
976 Kramer post hoc comparison, and two-way ANOVA with Tukey Kramer or Sidak's post-hoc  
977 comparison. Bar graphs show mean  $\pm$  SEM. Statistical analyses were performed using PRISM  
978 7 software (GraphPad). For all  $p$  values,  $*=0.01 < p < 0.05$ ,  $**=0.001 < p < 0.01$ ,  
979  $***=0.0001 < p < 0.001$ , and  $****=p < 0.0001$ .

980

#### 981 **Acknowledgements**

982 The authors would like to thank members of the Bautista and Barton labs for helpful discussions  
983 on the data. We are grateful to S. Ziegler (Ben Aroya Research Institute) for the gift of the  
984 TSLPR<sup>-/-</sup> mouse. We also thank M. Pellegrino and L. Thé for pilot studies on human  
985 keratinocyte transcriptome, and T. Morita and J. Wong for technical assistance with mouse  
986 behavioral experiments. D.M.B. is supported by the NIH (AR059385; NS07224 and NS098097,  
987 also to R.B.B) and the Howard Hughes Medical Institute. G.M.B. is supported by the NIH  
988 (AI072429, AI063302, AI104914, AI105184) and the Burroughs Wellcome Fund. J.D. was  
989 supported by a Long-Term Fellowship from the Human Frontier Science Program (LT-  
990 000081/2013-L). K.G. is supported by NIH grant EY026082. Confocal imaging experiments  
991 were conducted at the CRL Molecular Imaging Center, supported by the Helen Wills  
992 Neuroscience Institute (UC Berkeley). We would like to thank H. Aaron and F. Ives for their  
993 microscopy training and assistance. This work used the Functional Genomics Laboratory and  
994 the Vincent J. Coates Genomics Sequencing Laboratory at UC Berkeley, supported by NIH S10  
995 OD018174 Instrumentation Grant.

996  
997  
998  
999

### Conflict of interest statement

The authors declare no conflict of interest.

### References

- 1000  
1001  
1002  
1003  
1004  
1005  
1006  
1007  
1008  
1009  
1010  
1011  
1012  
1013  
1014  
1015  
1016  
1017  
1018  
1019  
1020  
1021  
1022  
1023  
1024  
1025  
1026  
1027  
1028  
1029  
1030  
1031  
1032  
1033  
1034  
1035  
1036  
1037  
1038  
1039  
1040  
1041  
1042  
1043  
1044  
1045  
1046
1. Matteredne, U., Apfelbacher, C., Loerbroks, A., Schwarzer, T., Büttner, M., Ofenloch, R., Diepgen, T. & Weisshaar, E. Prevalence, correlates and characteristics of chronic pruritus: a population-based cross-sectional study. *Acta Derm. Venereol.* **91**, 674–679 (2011).
  2. Mollanazar, N. K., Smith, P. K. & Yosipovitch, G. Mediators of Chronic Pruritus in Atopic Dermatitis: Getting the Itch Out? *Clin Rev Allergy Immunol* **51**, 263–292 (2016).
  3. Dalgard, F. J., Gieler, U., Tomas-Aragones, L., Lien, L., Poot, F., Jemec, G. B. E., Misery, L., Szabo, C., Linder, D., Sampogna, F., Evers, A. W. M., Halvorsen, J. A., Balieva, F., Szepletowski, J., Romanov, D., Marron, S. E., Altunay, I. K., Finlay, A. Y., Salek, S. S. & Kupfer, J. The Psychological Burden of Skin Diseases: A Cross-Sectional Multicenter Study among Dermatological Out-Patients in 13 European Countries. *J. Invest. Dermatol.* **135**, 984–991 (2015).
  4. Ständer, S. & Steinhoff, M. Pathophysiology of pruritus in atopic dermatitis: an overview. *Exp. Dermatol.* **11**, 12–24 (2002).
  5. Oaklander, A. L. Neuropathic itch. *Semin. Cutan. Med. Surg.* **30**, 87–92 (2011).
  6. Dhand, A. & Aminoff, M. J. The neurology of itch. *Brain* **137**, 313–322 (2014).
  7. Yosipovitch, G. & Papoiu, A. D. P. What causes itch in atopic dermatitis? *Curr. Allergy Asthma Rep.* **8**, 306–311 (2008).
  8. Ikoma, A., Steinhoff, M., Ständer, S., Yosipovitch, G. & Schmelz, M. The neurobiology of itch. *Nat. Rev. Neurosci.* **7**, 535–547 (2006).
  9. Spengel, J. M. & Paller, A. S. Atopic dermatitis and the atopic march. *J Allergy Clin Immunol* **112**, S118-27 (2003).
  10. Zheng, T., Yu, J., Oh, M. H. & Zhu, Z. The atopic march: Progression from atopic dermatitis to allergic rhinitis and asthma. *Allergy, Asthma Immunol. Res.* **3**, 67–73 (2011).
  11. Ewald, D. A., Noda, S., Oliva, M., Litman, T., Nakajima, S., Li, X., Xu, H., Workman, C. T., Scheipers, P., Svitacheva, N., Labuda, T., Krueger, J. G., Suárez-Fariñas, M., Kabashima, K. & Guttman-Yassky, E. Major differences between human atopic dermatitis and murine models, as determined by using global transcriptomic profiling. *J. Allergy Clin. Immunol.* **139**, 562–571 (2017).
  12. Choy, D. F., Hsu, D. K., Seshasayee, D., Fung, M. A., Modrusan, Z., Martin, F., Liu, F.-T. & Arron, J. R. Comparative transcriptomic analyses of atopic dermatitis and psoriasis reveal shared neutrophilic inflammation. *J. Allergy Clin. Immunol.* **130**, 1335–43.e5 (2012).
  13. Guttman-Yassky, E., Suárez-Fariñas, M., Chiricozzi, A., Nogales, K. E., Shemer, A., Fuentes-Duculan, J., Cardinale, I., Lin, P., Bergman, R., Bowcock, A. M. & Krueger, J. G. Broad defects in epidermal cornification in atopic dermatitis identified through genomic analysis. *J. Allergy Clin. Immunol.* **124**, (2009).
  14. Suárez-Fariñas, M., Dhingra, N., Gittler, J., Shemer, A., Cardinale, I., De Guzman Strong, C., Krueger, J. G. & Guttman-Yassky, E. Intrinsic atopic dermatitis shows similar TH2 and higher TH17 immune activation compared with extrinsic atopic dermatitis. *J. Allergy Clin. Immunol.* **132**, 361–370 (2013).
  15. Jabbari, A., Suárez-Fariñas, M., Dewell, S. & Krueger, J. G. Transcriptional profiling of psoriasis using RNA-seq reveals previously unidentified differentially expressed genes. *J. Invest. Dermatol.* **132**, 246–9 (2012).
  16. Nattkemper, L. A., Tey, H. L., Valdes-Rodriguez, R., Lee, H., Mollanazar, N. K., Albornoz, C., Sanders, K. M. & Yosipovitch, G. The Genetics of Chronic Itch: Gene Expression in

- 1047 the Skin of Patients with Atopic Dermatitis and Psoriasis with Severe Itch. *J. Invest.*  
1048 *Dermatol.* **138**, 1311–1317 (2018).
- 1049 17. Dai, J., Choo, M. K., Park, J. M. & Fisher, D. E. Topical ROR Inverse Agonists Suppress  
1050 Inflammation in Mouse Models of Atopic Dermatitis and Acute Irritant Dermatitis. *J.*  
1051 *Invest. Dermatol.* **137**, 2523–2531 (2017).
- 1052 18. Li, M., Hener, P., Zhang, Z., Ganti, K. P., Metzger, D. & Chambon, P. Induction of thymic  
1053 stromal lymphopoietin expression in keratinocytes is necessary for generating an atopic  
1054 dermatitis upon application of the active vitamin D3 analogue MC903 on mouse skin. *J.*  
1055 *Invest. Dermatol.* **129**, 498–502 (2009).
- 1056 19. Li, M., Hener, P., Zhang, Z., Kato, S., Metzger, D. & Chambon, P. Topical vitamin D3 and  
1057 low-calcemic analogs induce thymic stromal lymphopoietin in mouse keratinocytes and  
1058 trigger an atopic dermatitis. *Proc. Natl. Acad. Sci.* **103**, 11736–11741 (2006).
- 1059 20. Zhang, Z., Hener, P., Frossard, N., Kato, S., Metzger, D., Li, M. & Chambon, P. Thymic  
1060 stromal lymphopoietin overproduced by keratinocytes in mouse skin aggravates  
1061 experimental asthma. *Proc. Natl. Acad. Sci.* **106**, 1536–1541 (2009).
- 1062 21. Moosbrugger-Martinez, V., Schmuth, M. & Dubrac, S. A Mouse Model for Atopic Dermatitis  
1063 Using Topical Application of Vitamin D3 or of Its Analog MC903. *Methods Mol. Biol.* **1559**,  
1064 91–106 (2017).
- 1065 22. Oetjen, L. K., Mack, M. R., Feng, J., Whelan, T. M., Niu, H., Guo, C. J., Chen, S., Trier, A.  
1066 M., Xu, A. Z., Tripathi, S. V., Luo, J., Gao, X., Yang, L., Hamilton, S. L., Wang, P. L.,  
1067 Brestoff, J. R., Council, M. L., Brasington, R., Schaffer, A., Brombacher, F., Hsieh, C.-S.,  
1068 Gereau, R. W., Miller, M. J., Chen, Z.-F., Hu, H., Davidson, S., Liu, Q. & Kim, B. S.  
1069 Sensory Neurons Co-opt Classical Immune Signaling Pathways to Mediate Chronic Itch.  
1070 *Cell* **171**, 217-228.e13 (2017).
- 1071 23. Morita, T., McClain, S. P., Batia, L. M., Pellegrino, M., Wilson, S. R., Kienzler, M. A.,  
1072 Lyman, K., Olsen, A. S. B., Wong, J. F., Stucky, C. L., Brem, R. B. & Bautista, D. M.  
1073 HTR7 Mediates Serotonergic Acute and Chronic Itch. *Neuron* 1–15 (2015).  
1074 doi:10.1016/j.neuron.2015.05.044
- 1075 24. Kim, D., Kobayashi, T. & Nagao, K. Research Techniques Made Simple: Mouse Models  
1076 of Atopic Dermatitis. *J. Invest. Dermatol.* **139**, 984-990.e1 (2019).
- 1077 25. Cevikbas, F., Wang, X., Akiyama, T., Kempkes, C., Savinko, T., Antal, A., Kukova, G.,  
1078 Buhl, T., Ikoma, A., Buddenkotte, J., Soumelis, V., Feld, M., Alenius, H., Dillon, S. R.,  
1079 Carstens, E. E., Homey, B., Basbaum, A. I. & Steinhoff, M. A sensory neuron-expressed  
1080 IL-31 receptor mediates T helper cell-dependent itch: Involvement of TRPV1 and TRPA1.  
1081 *J. Allergy Clin. Immunol.* **133**, 448–460 (2014).
- 1082 26. Meng, J., Moriyama, M., Feld, M., Buddenkotte, J., Buhl, T., Szöllösi, A., Zhang, J., Miller,  
1083 P., Ghatti, A., Fischer, M., Reeh, P. W., Shan, C., Wang, J. & Steinhoff, M. New  
1084 mechanism underlying IL-31-induced atopic dermatitis. *J. Allergy Clin. Immunol.* (2017).  
1085 doi:10.1016/j.jaci.2017.12.1002
- 1086 27. Martel, B. C., Lovato, P., Bäumer, W. & Olivry, T. Translational animal models of atopic  
1087 dermatitis for preclinical studies. *Yale J. Biol. Med.* **90**, 389–402 (2017).
- 1088 28. Rattenholl, A. & Steinhoff, M. Role of proteinase-activated receptors in cutaneous biology  
1089 and disease. *Drug Dev. Res.* **59**, 408–416 (2003).
- 1090 29. Yosipovitch, G. Dry skin and impairment of barrier function associated with itch - new  
1091 insights. *Int J Cosmet Sci* **26**, 1–7 (2004).
- 1092 30. Briot, A., Lacroix, M., Robin, A., Steinhoff, M., Deraison, C. & Hovnanian, A. Par2  
1093 inactivation inhibits early production of TSLP, but not cutaneous inflammation, in  
1094 netherton syndrome adult mouse model. *J. Invest. Dermatol.* **130**, 2736–2742 (2010).
- 1095 31. Demehri, S., Morimoto, M., Holtzman, M. J. & Kopan, R. Skin-derived TSLP triggers  
1096 progression from epidermal-barrier defects to asthma. *PLoS Biol.* **7**, e1000067 (2009).
- 1097 32. Gao, P. S., Rafaels, N. M., Mu, D., Hand, T., Murray, T., Boguniewicz, M., Hata, T.,

- 1098 Schneider, L., Hanifin, J. M., Gallo, R. L., Gao, L., Beaty, T. H., Beck, L. A., Leung, D. Y.  
1099 M. & Barnes, K. C. Genetic variants in thymic stromal lymphopoietin are associated with  
1100 atopic dermatitis and eczema herpeticum. *J. Allergy Clin. Immunol.* **125**, 1403–1407  
1101 (2010).
- 1102 33. Kim, B. S., Siracusa, M. C., Saenz, S. A., Noti, M., Monticelli, L. A., Sonnenberg, G. F.,  
1103 Hepworth, M. R., Van Voorhees, A. S., Comeau, M. R. & Artis, D. TSLP elicits IL-33-  
1104 independent innate lymphoid cell responses to promote skin inflammation. *Sci Transl  
1105 Med* **5**, 170ra16-170ra16 (2013).
- 1106 34. Hidaka, T., Ogawa, E., Kobayashi, E. H., Suzuki, T., Funayama, R., Nagashima, T.,  
1107 Fujimura, T., Aiba, S., Nakayama, K., Okuyama, R. & Yamamoto, M. The aryl  
1108 hydrocarbon receptor AhR links atopic dermatitis and air pollution via induction of the  
1109 neurotrophic factor artemin. *Nat. Immunol.* **18**, 64–73 (2017).
- 1110 35. Kou, K., Nakamura, F., Aihara, M., Chen, H., Seto, K., Komuri-Yamaguchi, J., Kambara,  
1111 T., Nagashima, Y., Goshima, Y. & Ikezawa, Z. Decreased expression of semaphorin-3A,  
1112 a neurite-collapsing factor, is associated with itch in psoriatic skin. *Acta Derm. Venereol.*  
1113 **92**, 521–528 (2012).
- 1114 36. Tominaga, M. & Takamori, K. Recent Advances in the Study of Itching An Update on  
1115 Peripheral Mechanisms and Treatments of Itch. **36**, 1241–1247 (2013).
- 1116 37. Tominaga, M., Ozawa, S., Ogawa, H. & Takamori, K. A hypothetical mechanism of  
1117 intraepidermal neurite formation in NC/Nga mice with atopic dermatitis. *J. Dermatol. Sci.*  
1118 **46**, 199–210 (2007).
- 1119 38. Tominaga, M. & Takamori, K. Itch and nerve fibers with special reference to atopic  
1120 dermatitis: therapeutic implications. *J. Dermatol.* **41**, 205–212 (2014).
- 1121 39. Haas, S., Capellino, S., Phan, N. Q., Böhm, M., Luger, T. A., Straub, R. H. & Ständer, S.  
1122 Low density of sympathetic nerve fibers relative to substance P-positive nerve fibers in  
1123 lesional skin of chronic pruritus and prurigo nodularis. *J. Dermatol. Sci.* **58**, 193–197  
1124 (2010).
- 1125 40. Kamo, A., Tominaga, M., Taneda, K., Ogawa, H. & Takamori, K. Neurotrophin inhibits the  
1126 increase in intraepidermal nerve density in the acetone-treated dry-skin mouse model.  
1127 *Clin. Exp. Dermatol.* **38**, 665–668 (2013).
- 1128 41. Oaklander, A. L. & Siegel, S. M. Cutaneous innervation: Form and function. *J. Am. Acad.  
1129 Dermatol.* **53**, 1027–1037 (2005).
- 1130 42. Schüttenhelm, B. N., Duraku, L. S., Dijkstra, J. F., Walbeehm, E. T. & Holstege, J. C.  
1131 Differential Changes in the Peptidergic and the Non-Peptidergic Skin Innervation in Rat  
1132 Models for Inflammation, Dry Skin Itch, and Dermatitis. *J. Invest. Dermatol.* **135**, 2049–  
1133 2057 (2015).
- 1134 43. Pereira, M. P., Mühl, S., Pogatzki-Zahn, E. M., Agelopoulos, K. & Ständer, S.  
1135 Intraepidermal Nerve Fiber Density: Diagnostic and Therapeutic Relevance in the  
1136 Management of Chronic Pruritus: a Review. *Dermatol. Ther. (Heidelb)*. **6**, 509–517  
1137 (2016).
- 1138 44. Tominaga, M., Tenggara, S., Kamo, A., Ogawa, H. & Takamori, K. Psoralen-ultraviolet A  
1139 therapy alters epidermal Sema3A and NGF levels and modulates epidermal innervation  
1140 in atopic dermatitis. *J. Dermatol. Sci.* **55**, 40–46 (2009).
- 1141 45. Palmer, C. N. a, Irvine, A. D., Terron-Kwiatkowski, A., Zhao, Y., Liao, H., Lee, S. P.,  
1142 Goudie, D. R., Sandilands, A., Campbell, L. E., Smith, F. J. D., O'Regan, G. M., Watson,  
1143 R. M., Cecil, J. E., Bale, S. J., Compton, J. G., DiGiovanna, J. J., Fleckman, P., Lewis-  
1144 Jones, S., Arseculeratne, G., Sergeant, A., Munro, C. S., El Houate, B., McElreavey, K.,  
1145 Halkjaer, L. B., Bisgaard, H., Mukhopadhyay, S. & McLean, W. H. I. Common loss-of-  
1146 function variants of the epidermal barrier protein filaggrin are a major predisposing factor  
1147 for atopic dermatitis. *Nat. Genet.* **38**, 441–446 (2006).
- 1148 46. Sandilands, A., Terron-Kwiatkowski, A., Hull, P. R., O'Regan, G. M., Clayton, T. H.,

- 1149 Watson, R. M., Carrick, T., Evans, A. T., Liao, H., Zhao, Y., Campbell, L. E., Schmuth,  
1150 M., Gruber, R., Janecke, A. R., Elias, P. M., van Steensel, M. A. M., Nagtzaam, I., van  
1151 Geel, M., Steijlen, P. M., Munro, C. S., Bradley, D. G., Palmer, C. N. A., Smith, F. J. D.,  
1152 McLean, W. H. I. & Irvine, A. D. Comprehensive analysis of the gene encoding filaggrin  
1153 uncovers prevalent and rare mutations in ichthyosis vulgaris and atopic eczema. *Nat.*  
1154 *Genet.* **39**, 650–654 (2007).
- 1155 47. Gittler, J. K., Shemer, A., Suárez-Fariñas, M., Fuentes-Duculan, J., Gulewicz, K. J.,  
1156 Wang, C. Q. F., Mitsui, H., Cardinale, I., De Guzman Strong, C., Krueger, J. G. &  
1157 Guttman-Yassky, E. Progressive activation of TH2/TH22 cytokines and selective  
1158 epidermal proteins characterizes acute and chronic atopic dermatitis. *J. Allergy Clin.*  
1159 *Immunol.* **130**, 1344–1354 (2012).
- 1160 48. Oetjen, L. K. & Kim, B. S. Interactions of the immune and sensory nervous systems in  
1161 atopy. *FEBS J.* **285**, 3138–3151 (2018).
- 1162 49. Mansouri, Y. & Guttman-Yassky, E. Immune Pathways in Atopic Dermatitis, and  
1163 Definition of Biomarkers through Broad and Targeted Therapeutics. *J Clin Med* **4**, 858–  
1164 873 (2015).
- 1165 50. Guttman-Yassky, E. & Krueger, J. G. Atopic dermatitis and psoriasis: two different  
1166 immune diseases or one spectrum? *Curr. Opin. Immunol.* **48**, 68–73 (2017).
- 1167 51. Dong, X. X. & Dong, X. X. Peripheral and Central Mechanisms of Itch. *Neuron* **98**, 482–  
1168 494 (2018).
- 1169 52. Hashimoto, T., Rosen, J. D., Sanders, K. M. & Yosipovitch, G. Possible role of  
1170 neutrophils in itch. *Itch* **1** (2018). doi:10.1097/itx.0000000000000017
- 1171 53. Fogh, K., Herlin, T. & Kragballe, K. Eicosanoids in skin of patients with atopic dermatitis:  
1172 prostaglandin E2 and leukotriene B4 are present in biologically active concentrations. *J.*  
1173 *Allergy Clin. Immunol.* **83**, 450–455 (1989).
- 1174 54. Ghasemlou, N., Chiu, I. M., Julien, J.-P. & Woolf, C. J. CD11b<sup>+</sup>Ly6G<sup>-</sup> myeloid cells  
1175 mediate mechanical inflammatory pain hypersensitivity. *Proc. Natl. Acad. Sci.* 201501372  
1176 (2015). doi:10.1073/pnas.1501372112
- 1177 55. Sivick, K. E., Arpaia, N., Reiner, G. L., Lee, B. L., Russell, B. R. & Barton, G. M. Toll-like  
1178 receptor-deficient mice reveal how innate immune signaling influences Salmonella  
1179 virulence strategies. *Cell Host Microbe* **15**, 203–213 (2014).
- 1180 56. Shimada, S. G. & LaMotte, R. H. Behavioral differentiation between itch and pain in  
1181 mouse. *Pain* **139**, 681–687 (2008).
- 1182 57. Deftu, A. F., Filippi, A., Shibasaki, K., Gheorghe, R. O., Chiritoiu, M. & Ristoiu, V.  
1183 Chemokine (C-X-C motif) ligand 1 (CXCL1) and chemokine (C-X-C motif) ligand 2  
1184 (CXCL2) modulate the activity of TRPV1<sup>+</sup>/IB4<sup>+</sup> cultured rat dorsal root ganglia neurons  
1185 upon short-term and acute application. *J. Physiol. Pharmacol.* **68**, 385–395 (2017).
- 1186 58. Deftu, A. F., Filippi, A., Gheorghe, R. O. & Ristoiu, V. CXCL1 activates TRPV1 via Gi/o  
1187 protein and actin filaments. *Life Sci.* **193**, 282–291 (2018).
- 1188 59. Carpino, N., Thierfelder, W. E., Chang, M., Saris, C., Turner, S. J., Ziegler, S. F. & Ihle, J.  
1189 N. Absence of an essential role for thymic stromal lymphopoietin receptor in murine B-cell  
1190 development. *Mol. Cell. Biol.* **24**, 2584–2592 (2004).
- 1191 60. Briot, A., Deraison, C., Lacroix, M., Bonnart, C., Robin, A., Besson, C., Dubus, P. &  
1192 Hovnanian, A. Kallikrein 5 induces atopic dermatitis-like lesions through PAR2-mediated  
1193 thymic stromal lymphopoietin expression in Netherton syndrome. *J. Exp. Med.* **206**,  
1194 1135–1147 (2009).
- 1195 61. Zhang, Y., Yan, J., Hu, R., Sun, Y., Ma, Y., Chen, Z. & Jiang, H. Microglia are involved in  
1196 pruritus induced by DNFB via the CX3CR1/p38 MAPK pathway. *Cell. Physiol. Biochem.*  
1197 **35**, 1023–1033 (2015).
- 1198 62. Kitamura, A., Takata, R., Aizawa, S., Watanabe, H. & Wada, T. A murine model of atopic  
1199 dermatitis can be generated by painting the dorsal skin with hapten twice 14 days apart.



- 1200 *Sci. Rep.* **8**, 1–9 (2018).
- 1201 63. Solinski, H. J., Dranchak, P., Oliphant, E., Gu, X., Earnest, T. W., Braisted, J., Inglese, J.  
1202 & Hoon, M. A. Inhibition of natriuretic peptide receptor 1 reduces itch in mice. *Sci. Transl.*  
1203 *Med.* **11**, eaav5464 (2019).
- 1204 64. Usoskin, D., Furlan, A., Islam, S., Abdo, H., Lönnerberg, P., Lou, D., Hjerling-Leffler, J.,  
1205 Haeggström, J., Kharchenko, O., Kharchenko, P. V., Linnarsson, S. & Ernfors, P.  
1206 Unbiased classification of sensory neuron types by large-scale single-cell RNA  
1207 sequencing. *Nat. Neurosci.* **18**, 145–153 (2015).
- 1208 65. Takeda, M., Takahashi, M. & Matsumoto, S. Contribution of the activation of satellite glia  
1209 in sensory ganglia to pathological pain. *Neurosci. Biobehav. Rev.* **33**, 784–792 (2009).
- 1210 66. Huang, J., Polgár, E., Solinski, H. J., Mishra, S. K., Tseng, P.-Y., Iwagaki, N., Boyle, K.  
1211 A., Dickie, A. C., Kriegbaum, M. C., Wildner, H., Zeilhofer, H. U., Watanabe, M., Riddell,  
1212 J. S., Todd, A. J. & Hoon, M. A. Circuit dissection of the role of somatostatin in itch and  
1213 pain. *Nat. Neurosci.* **2018** 1 (2018). doi:10.1038/s41593-018-0119-z
- 1214 67. Solinski, H. J., Kriegbaum, M. C., Tseng, P. Y., Earnest, T. W., Gu, X., Barik, A., Chesler,  
1215 A. T. & Hoon, M. A. Nppb Neurons Are Sensors of Mast Cell-Induced Itch. *Cell Rep.* **26**,  
1216 3561–3573.e4 (2019).
- 1217 68. Shiratori-Hayashi, M., Koga, K., Tozaki-Saitoh, H., Kohro, Y., Toyonaga, H., Yamaguchi,  
1218 C., Hasegawa, A., Nakahara, T., Hachisuka, J., Akira, S., Okano, H., Furue, M., Inoue, K.  
1219 & Tsuda, M. STAT3-dependent reactive astrogliosis in the spinal dorsal horn underlies  
1220 chronic itch. *Nat. Med.* **21**, 1–8 (2015).
- 1221 69. Ioannidis, L. J., Nie, C. Q., Ly, A., Ryg-Cornejo, V., Chiu, C. Y. & Hansen, D. S.  
1222 Monocyte- and Neutrophil-Derived CXCL10 Impairs Efficient Control of Blood-Stage  
1223 Malaria Infection and Promotes Severe Disease. *J. Immunol.* **196**, 1227–1238 (2016).
- 1224 70. Kanda, N., Shimizu, T., Tada, Y. & Watanabe, S. IL-18 enhances IFN- $\gamma$ -induced  
1225 production of CXCL9, CXCL10, and CXCL11 in human keratinocytes. *Eur. J. Immunol.*  
1226 **37**, 338–350 (2007).
- 1227 71. Koga, C., Kabashima, K., Shiraishi, N., Kobayashi, M. & Tokura, Y. Possible pathogenic  
1228 role of Th17 cells for atopic dermatitis. *J. Invest. Dermatol.* **128**, 2625–2630 (2008).
- 1229 72. Michalec, L., Choudhury, B. K., Postlethwait, E., Wild, J. S., Alam, R., Lett-Brown, M. &  
1230 Sur, S. CCL7 and CXCL10 Orchestrate Oxidative Stress-Induced Neutrophilic Lung  
1231 Inflammation. *J. Immunol.* **168**, 846–852 (2002).
- 1232 73. Padovan, E., Spagnoli, G. C., Ferrantini, M. & Heberer, M. IFN- $\alpha$ 2a induces IP-  
1233 10/CXCL10 and MIG/CXCL9 production in monocyte-derived dendritic cells and  
1234 enhances their capacity to attract and stimulate CD8<sup>+</sup> effector T cells. *J. Leukoc. Biol.* **71**,  
1235 669–676 (2002).
- 1236 74. Tamassia, N., Calzetti, F., Ear, T., Cloutier, A., Gasperini, S., Bazzoni, F., McDonald, P.  
1237 P. & Cassatella, M. A. Molecular mechanisms underlying the synergistic induction of  
1238 CXCL10 by LPS and IFN- $\gamma$  in human neutrophils. *Eur. J. Immunol.* **37**, 2627–2634  
1239 (2007).
- 1240 75. Qu, L., Fu, K., Yang, J., Shimada, S. G. & LaMotte, R. H. *CXCR3 chemokine receptor*  
1241 *signaling mediates itch in experimental allergic contact dermatitis.* *Pain* **156**, (2015).
- 1242 76. Koro, O., Furutani, K., Hide, M., Yamada, S. & Yamamoto, S. Chemical mediators in  
1243 atopic dermatitis: Involvement of leukotriene B4 released by a type I allergic reaction in  
1244 the pathogenesis of atopic dermatitis. *J. Allergy Clin. Immunol.* **103**, 663–670 (1999).
- 1245 77. Mihm, M. C., Soter, N. A., Dvorak, H. F. & Austen, K. F. The structure of normal skin and  
1246 the morphology of atopic eczema. *J. Invest. Dermatol.* **67**, 305–312 (1976).
- 1247 78. Shalit, M., Campbell, D. E., von Allmen, C., Atkins, P. C., Douglas, S. D. & Zweiman, B.  
1248 Neutrophil activation in human inflammatory skin reactions. *J. Allergy Clin. Immunol.* **80**,  
1249 87–93 (1987).
- 1250 79. Sumida, H., Yanagida, K., Kita, Y., Abe, J., Matsushima, K., Nakamura, M., Ishii, S.,

- 1251 Sato, S. & Shimizu, T. Interplay between CXCR2 and BLT1 facilitates neutrophil  
1252 infiltration and resultant keratinocyte activation in a murine model of imiquimod-induced  
1253 psoriasis. *J. Immunol.* **192**, 4361–4369 (2014).
- 1254 80. Perkins, N. M. & Tracey, D. J. Hyperalgesia due to nerve injury: role of neutrophils.  
1255 *Neuroscience* **101**, 745–757 (2000).
- 1256 81. Guerrero, A. T. G., Verri, W. A., Cunha, T. M., Silva, T. A., Schivo, I. R. S., Dal-Secco, D.,  
1257 Canetti, C., Rocha, F. A. C., Parada, C. A., Cunha, F. Q. & Ferreira, S. H. Involvement of  
1258 LTB4 in zymosan-induced joint nociception in mice: participation of neutrophils and  
1259 PGE2. *J. Leukoc. Biol.* **83**, 122–130 (2008).
- 1260 82. Cunha, J. M., Sachs, D., Canetti, C. A., Poole, S., Ferreira, S. H. & Cunha, F. Q. The  
1261 critical role of leukotriene B 4 in antigen-induced mechanical hyperalgesia in immunised  
1262 rats. *Br. J. Pharmacol.* **139**, 1135–1145 (2003).
- 1263 83. Finley, a, Chen, Z., Esposito, E., Cuzzocrea, S., Sabbadini, R. & Salvemini, D.  
1264 Sphingosine 1-phosphate mediates hyperalgesia via a neutrophil-dependent mechanism.  
1265 *PLoS One* **8**, e55255 (2013).
- 1266 84. Carreira, E. U., Carregaro, V., Teixeira, M. M., Moriconi, A., Aramini, A., Verri, W. A.,  
1267 Ferreira, S. H., Cunha, F. Q. & Cunha, T. M. Neutrophils recruited by CXCR1/2 signalling  
1268 mediate post-incisional pain. *Eur J Pain* **17**, 654–663 (2013).
- 1269 85. Levine, J. D., Khasar, S. G. & Green, P. G. Neurogenic inflammation and arthritis. *Ann.*  
1270 *N. Y. Acad. Sci.* **1069**, 155–167 (2006).
- 1271 86. Schön, M., Kubitzka, R. C., Ruzicka, T., Schön, M. P. & Denzer, D. Critical Role of  
1272 Neutrophils for the Generation of Psoriasiform Skin Lesions in Flaky Skin Mice. *J. Invest.*  
1273 *Dermatol.* **114**, 976–983 (2003).
- 1274 87. Oyoshi, M. K., He, R., Li, Y., Mondal, S., Yoon, J., Afshar, R., Chen, M., Lee, D. M., Luo,  
1275 H. R., Luster, A. D., Cho, J. S., Miller, L. S., Larson, A., Murphy, G. F. & Geha, R. S.  
1276 Leukotriene B4-driven neutrophil recruitment to the skin is essential for allergic skin  
1277 inflammation. *Immunity* **37**, 747–758 (2012).
- 1278 88. Meixiong, J., Anderson, M., Limjunyawong, N., Sabbagh, M. F., Hu, E., Mack, M. R.,  
1279 Oetjen, L. K., Wang, F., Kim, B. S. & Dong, X. Activation of Mast-Cell-Expressed Mas-  
1280 Related G-Protein-Coupled Receptors Drives Non-histaminergic Itch. *Immunity* **50**, 1163-  
1281 1171.e5 (2019).
- 1282 89. Chatterjea, D. & Martinov, T. Mast cells: versatile gatekeepers of pain. *Mol. Immunol.* **63**,  
1283 38–44 (2015).
- 1284 90. Pinho-Ribeiro, F. A., Haarsma, R., Yang, N. J., Blake, K. J., Portley, M., Chiu, I. M.,  
1285 Baddal, B., O’Seaghdha, M., Wessels, M. R., Verri, W. A. & Dale, J. B. Blocking Neuronal  
1286 Signaling to Immune Cells Treats Streptococcal Invasive Infection. *Cell* **173**, 1083-  
1287 1097.e22 (2018).
- 1288 91. Salvemini, D., Little, J. W., Doyle, T. & Neumann, W. L. Roles of reactive oxygen and  
1289 nitrogen species in pain. *Free Radic. Biol. Med.* **51**, 951–966 (2011).
- 1290 92. Bautista, D. M., Jordt, S. E., Nikai, T., Tsuruda, P. R., Read, A. J., Poblete, J., Yamoah,  
1291 E. N., Basbaum, A. I. & Julius, D. TRPA1 Mediates the Inflammatory Actions of  
1292 Environmental Irritants and Proalgesic Agents. *Cell* **124**, 1269–1282 (2006).
- 1293 93. Liu, T. & Ji, R.-R. Oxidative stress induces itch via activation of transient receptor  
1294 potential subtype ankyrin 1 in mice. *Neurosci Bull* **28**, 145–154 (2012).
- 1295 94. Caceres, A. I., Brackmann, M., Elia, M. D., Bessac, B. F., del Camino, D.,  
1296 D’Amours, M., Witek, J. S., Fanger, C. M., Chong, J. A., Hayward, N. J., Homer, R.  
1297 J., Cohn, L., Huang, X., Moran, M. M. & Jordt, S.-E. A sensory neuronal ion channel  
1298 essential for airway inflammation and hyperreactivity in asthma. *Proc. Natl. Acad. Sci.*  
1299 *U.S.A.* **106**, 9099–9104 (2009).
- 1300 95. Wang, J. Neutrophils in tissue injury and repair. *Cell Tissue Res.* **371**, 531–539 (2018).
- 1301 96. Hammond, T. R., Robinton, D. & Stevens, B. Microglia and the Brain: Complementary

- 1302 Partners in Development and Disease. *Annu. Rev. Cell Dev. Biol.* **34**, 523–544 (2018).  
1303 97. Brunner, P. M., Guttman-Yassky, E. & Leung, D. Y. M. The immunology of atopic  
1304 dermatitis and its reversibility with broad-spectrum and targeted therapies. *J. Allergy Clin.*  
1305 *Immunol.* **139**, S65–S76 (2017).  
1306 98. Li, C., Maillet, I., Mackowiak, C., Viala, C., Padova, F. Di, Li, M., Togbe, D., Quesniaux,  
1307 V., Lai, Y. & Ryffel, B. Experimental atopic dermatitis depends on IL-33R signaling via  
1308 MyD88 in dendritic cells. *Cell Death Dis.* **8**, (2017).  
1309 99. Saunders, S. P., Moran, T., Floudas, A., Wurlod, F., Kaszlikowska, A., Salimi, M., Quinn,  
1310 E. M., Oliphant, C. J., Núñez, G., McManus, R., Hams, E., Irvine, A. D., McKenzie, A. N.  
1311 J., Ogg, G. S. & Fallon, P. G. Spontaneous atopic dermatitis is mediated by innate  
1312 immunity, with the secondary lung inflammation of the atopic March requiring adaptive  
1313 immunity. *J. Allergy Clin. Immunol.* **137**, 482–491 (2016).  
1314 100. Andersson, S. The role of mast cells and mast cell mediators in the development of  
1315 atopic dermatitis in a mouse model. *52* (2014).  
1316 101. Liu, B., Tai, Y., Liu, B., Caceres, A. I., Yin, C. & Jordt, S.-E. Transcriptome profiling  
1317 reveals Th2 bias and identifies endogenous itch mediators in poison ivy contact  
1318 dermatitis. *JCI Insight* (2019). doi:10.1172/jci.insight.124497  
1319 102. Malik, K., Ungar, B., Garcet, S., Dutt, R., Dickstein, D., Zheng, X., Xu, H., Estrada, Y. D.,  
1320 Suárez-Fariñas, M., Shemer, A., Krueger, J. G. & Guttman-Yassky, E. Dust mite induces  
1321 multiple polar T cell axes in human skin. *Clin. Exp. Allergy* **47**, 1648–1660 (2017).  
1322 103. Qu, L., Fu, K., Shimada, S. G. & LaMotte, R. H. Cl<sup>-</sup> channel is required for CXCL10-  
1323 induced neuronal activation and itch response in a murine model of allergic contact  
1324 dermatitis. *J. Neurophysiol.* **118**, 619–624 (2017).  
1325 104. Jing, P. B., Cao, D. L., Li, S. S., Zhu, M., Bai, X. Q., Wu, X. B. & Gao, Y. J. Chemokine  
1326 Receptor CXCR3 in the Spinal Cord Contributes to Chronic Itch in Mice. *Neurosci. Bull.*  
1327 **34**, 54–63 (2018).  
1328 105. Hamilton, J. D., Suárez-Fariñas, M., Dhingra, N., Cardinale, I., Li, X., Kostic, A., Ming,  
1329 J. E., Radin, A. R., Krueger, J. G., Graham, N., Yancopoulos, G. D., Pirozzi, G. &  
1330 Guttman-Yassky, E. Dupilumab improves the molecular signature in skin of patients with  
1331 moderate-to-severe atopic dermatitis. *J. Allergy Clin. Immunol.* **134**, 1293–1300 (2014).  
1332 106. Simpson, E. L., Bieber, T., Guttman-Yassky, E., Beck, L. A., Blauvelt, A., Cork, M. J.,  
1333 Silverberg, J. I., Deleuran, M., Kataoka, Y., Lacour, J.-P., Kingo, K., Worm, M., Poulin, Y.,  
1334 Wollenberg, A., Soo, Y., Graham, N. M. H., Pirozzi, G., Akinlade, B., Staudinger, H.,  
1335 Mastey, V., Eckert, L., Gadkari, A., Stahl, N., Yancopoulos, G. D., Ardeleanu, M. &  
1336 Investigators, S. 1 and S. 2. Two Phase 3 Trials of Dupilumab versus Placebo in Atopic  
1337 Dermatitis. *N. Engl. J. Med.* **375**, 2335–2348 (2016).  
1338 107. Yellin, M., Paliienko, I., Balanescu, A., Ter-Vartanian, S., Tseluyko, V., Xu, L. A., Tao, X.,  
1339 Cardarelli, P. M., Leblanc, H., Nichol, G., Ancuta, C., Chirieac, R. & Luo, A. A phase II,  
1340 randomized, double-blind, placebo-controlled study evaluating the efficacy and safety of  
1341 MDX-1100, a fully human anti-CXCL10 monoclonal antibody, in combination with  
1342 methotrexate in patients with rheumatoid arthritis. *Arthritis Rheum.* **64**, 1730–1739  
1343 (2012).  
1344 108. Scott, D., Wolfe, F. & Huizinga, T. Rheumatoid arthritis. *Lancet* **376**, 53–79 (2010).  
1345 109. Liu, B., Tai, Y., Achanta, S., Kaelberer, M. M., Caceres, A. I., Shao, X. & Fang, J. IL-33/  
1346 ST2 signaling excites sensory neurons and mediates itch response in a mouse model of  
1347 poison ivy contact allergy. **1**, (2016).  
1348 110. Baral, P., Umans, B. D., Li, L., Wallrapp, A., Bist, M., Kirschbaum, T., Wei, Y., Zhou, Y.,  
1349 Kuchroo, V. K., Burkett, P. R., Yipp, B. G., Liberles, S. D. & Chiu, I. M. Nociceptor  
1350 sensory neurons suppress neutrophil and  $\gamma\delta$  T cell responses in bacterial lung infections  
1351 and lethal pneumonia. *Nat. Med.* **24**, 417–426 (2018).  
1352 111. Pinho-Ribeiro, F. A., Verri, W. A. & Chiu, I. M. Nociceptor Sensory Neuron–Immune

- 1353 Interactions in Pain and Inflammation. *Trends Immunol.* **38**, 5–19 (2017).  
1354 112. Blake, K. J., Baral, P., Voisin, T., Lubkin, A., Pinho-Ribeiro, F. A., Adams, K. L.,  
1355 Roberson, D. P., Ma, Y. C., Otto, M., Woolf, C. J., Torres, V. J. & Chiu, I. M.  
1356 *Staphylococcus aureus* produces pain through pore-forming toxins and neuronal TRPV1  
1357 that is silenced by QX-314. *Nat. Commun.* **9**, (2018).  
1358 113. Langmead, B., Trapnell, C., Pop, M. & Salzberg, S. L. Ultrafast and memory-efficient  
1359 alignment of short DNA sequences to the human genome. *Genome Biol.* **10**, R25 (2009).  
1360 114. Langmead, B. & Salzberg, S. L. Fast gapped-read alignment with Bowtie 2. *Nat. Methods*  
1361 **9**, 357–359 (2012).  
1362 115. Anders, S. & Huber, W. Differential expression of RNA-Seq data at the gene level—the  
1363 DESeq package. *Heidelberg* (2012). at  
1364 <[http://watson.nci.nih.gov/bioc\\_mirror/packages/2.11/bioc/vignettes/DESeq/inst/doc/DESeq.pdf](http://watson.nci.nih.gov/bioc_mirror/packages/2.11/bioc/vignettes/DESeq/inst/doc/DESeq.pdf)>  
1365 eq.pdf>  
1366 116. Anders, S., McCarthy, D. J., Chen, Y., Okoniewski, M., Smyth, G. K., Huber, W. &  
1367 Robinson, M. D. Count-based differential expression analysis of RNA sequencing data  
1368 using R and Bioconductor. *Nat Protoc* **8**, 1765–1786 (2013).  
1369 117. Hill, R. Z., Hoffman, B. U., Morita, T., Campos, S. M., Lumpkin, E. A., Brem, R. B. &  
1370 Bautista, D. M. The signaling lipid sphingosine 1-phosphate regulates mechanical pain.  
1371 *Elife* **7**, e33285 (2018).  
1372 118. Marshall, K. L., Clary, R. C., Baba, Y., Orlowsky, R. L., Gerling, G. J. & Lumpkin, E. A.  
1373 Touch Receptors Undergo Rapid Remodeling in Healthy Skin. *Cell Rep.* **17**, 1719–1727  
1374 (2016).  
1375 119. Wilson, S. R., Gerhold, K. A., Bifolck-Fisher, A., Liu, Q., Patel, K. N., Dong, X. & Bautista,  
1376 D. M. TRPA1 is required for histamine-independent, Mas-related G protein-coupled  
1377 receptor-mediated itch. *Nat. Neurosci.* **14**, 595–602 (2011).  
1378 120. Morita, T., McClain, S. P. P., Batia, L. M. M., Pellegrino, M., Wilson, S. R. R., Kienzler, M.  
1379 A. A., Lyman, K., Olsen, A. S. B. S. B., Wong, J. F. F., Stucky, C. L. L., Brem, R. B. B. &  
1380 Bautista, D. M. M. HTR7 Mediates Serotonergic Acute and Chronic Itch. *Neuron* **87**, 124–  
1381 138 (2015).  
1382 121. von Moltke, J., Trinidad, N. J., Moayeri, M., Kintzer, A. F., Wang, S. B., Van Rooijen, N.,  
1383 Brown, C. R., Krantz, B. A., Leppla, S. H., Gronert, K. & Vance, R. E. Rapid induction of  
1384 inflammatory lipid mediators by the inflammasome in vivo. *Nat. Publ. Gr.* **490**, 107–111  
1385 (2012).  
1386 122. Sapienza, P., Stahl, A., Chen, J., Seaward, M. R., Willett, K. L., Krah, N. M., Dennison, R.  
1387 J., Connor, K. M., Aderman, C. M., Liclican, E., Carughi, A., Perelman, D., Kanaoka, Y.,  
1388 Sangiovanni, J. P., Gronert, K. & Smith, L. E. H. 5-Lipoxygenase metabolite 4-HDHA is a  
1389 mediator of the antiangiogenic effect of  $\omega$ -3 polyunsaturated fatty acids. *Sci Transl Med*  
1390 **3**, 69ra12-69ra12 (2011).  
1391

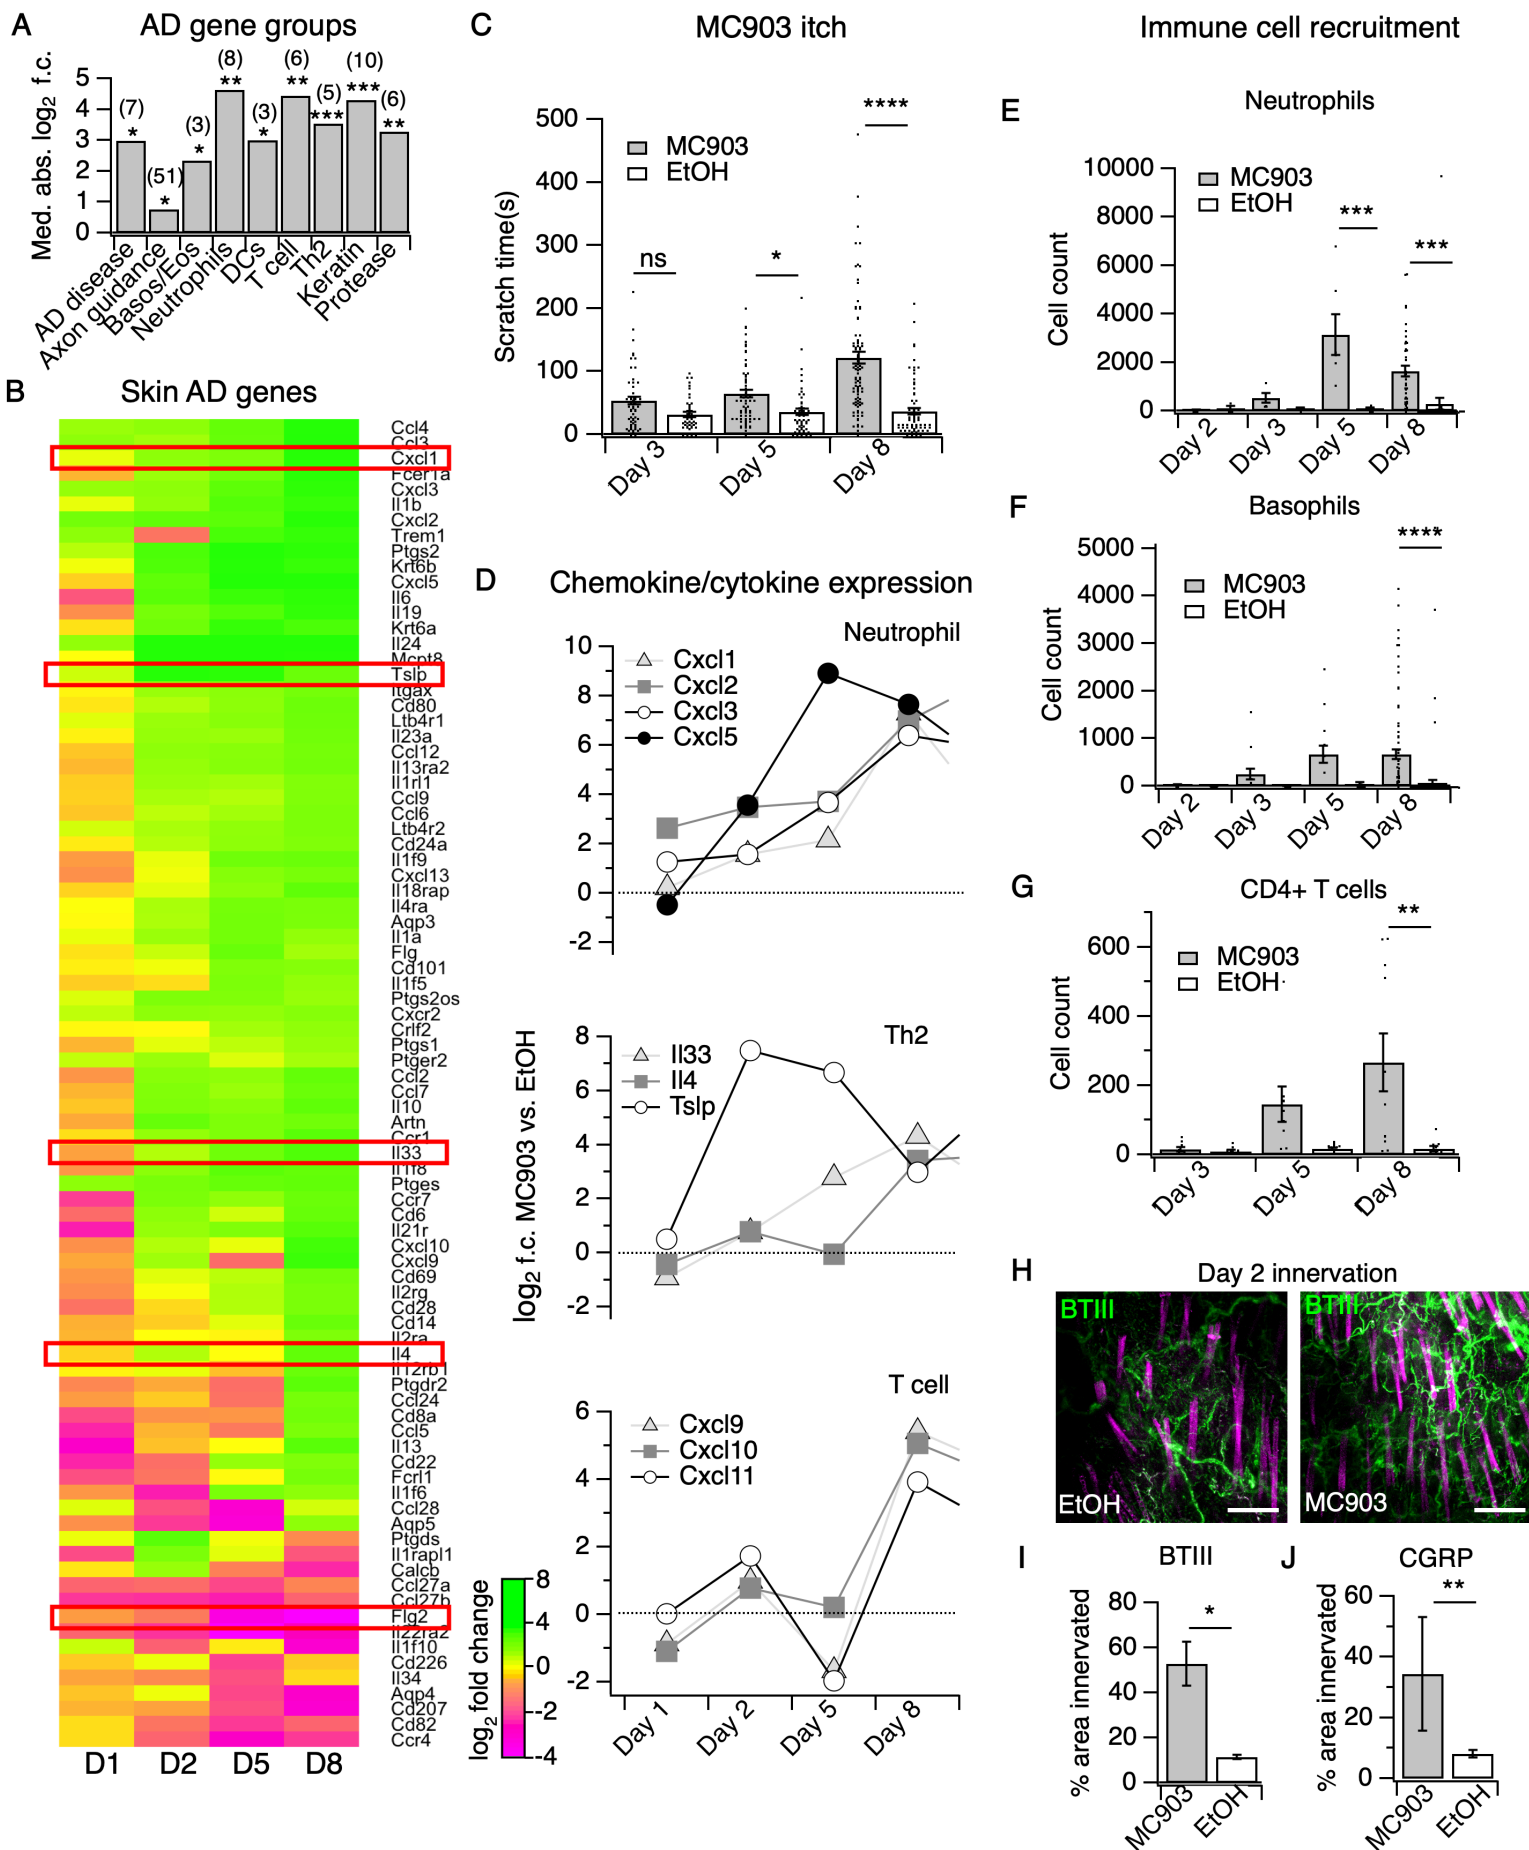

## A Mouse and human itch genes

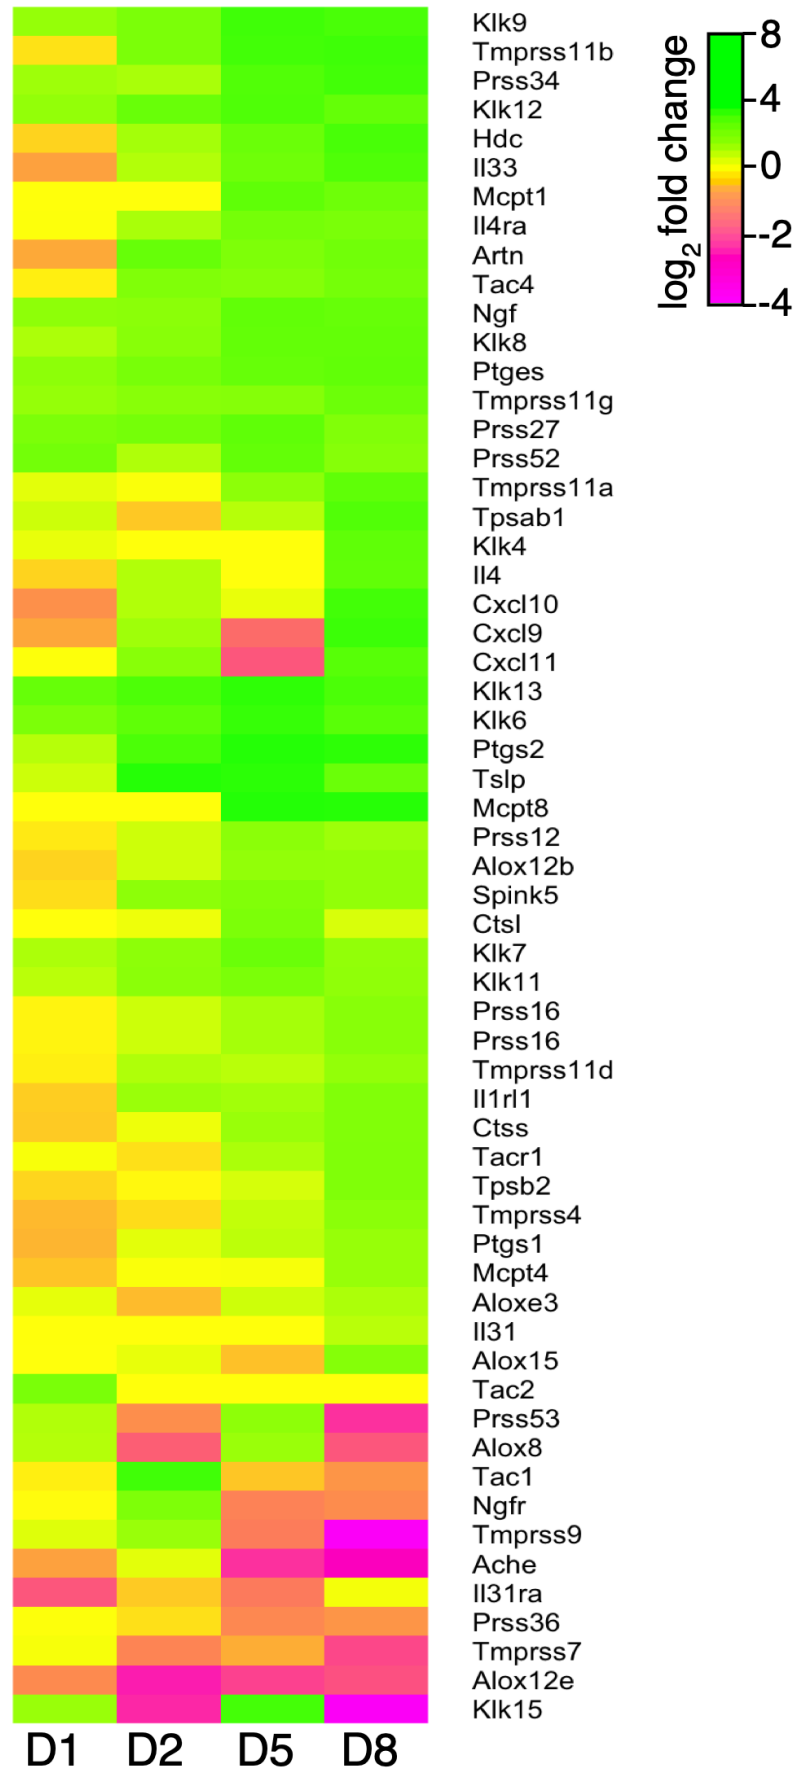

Figure 1-Figure Supplement 1

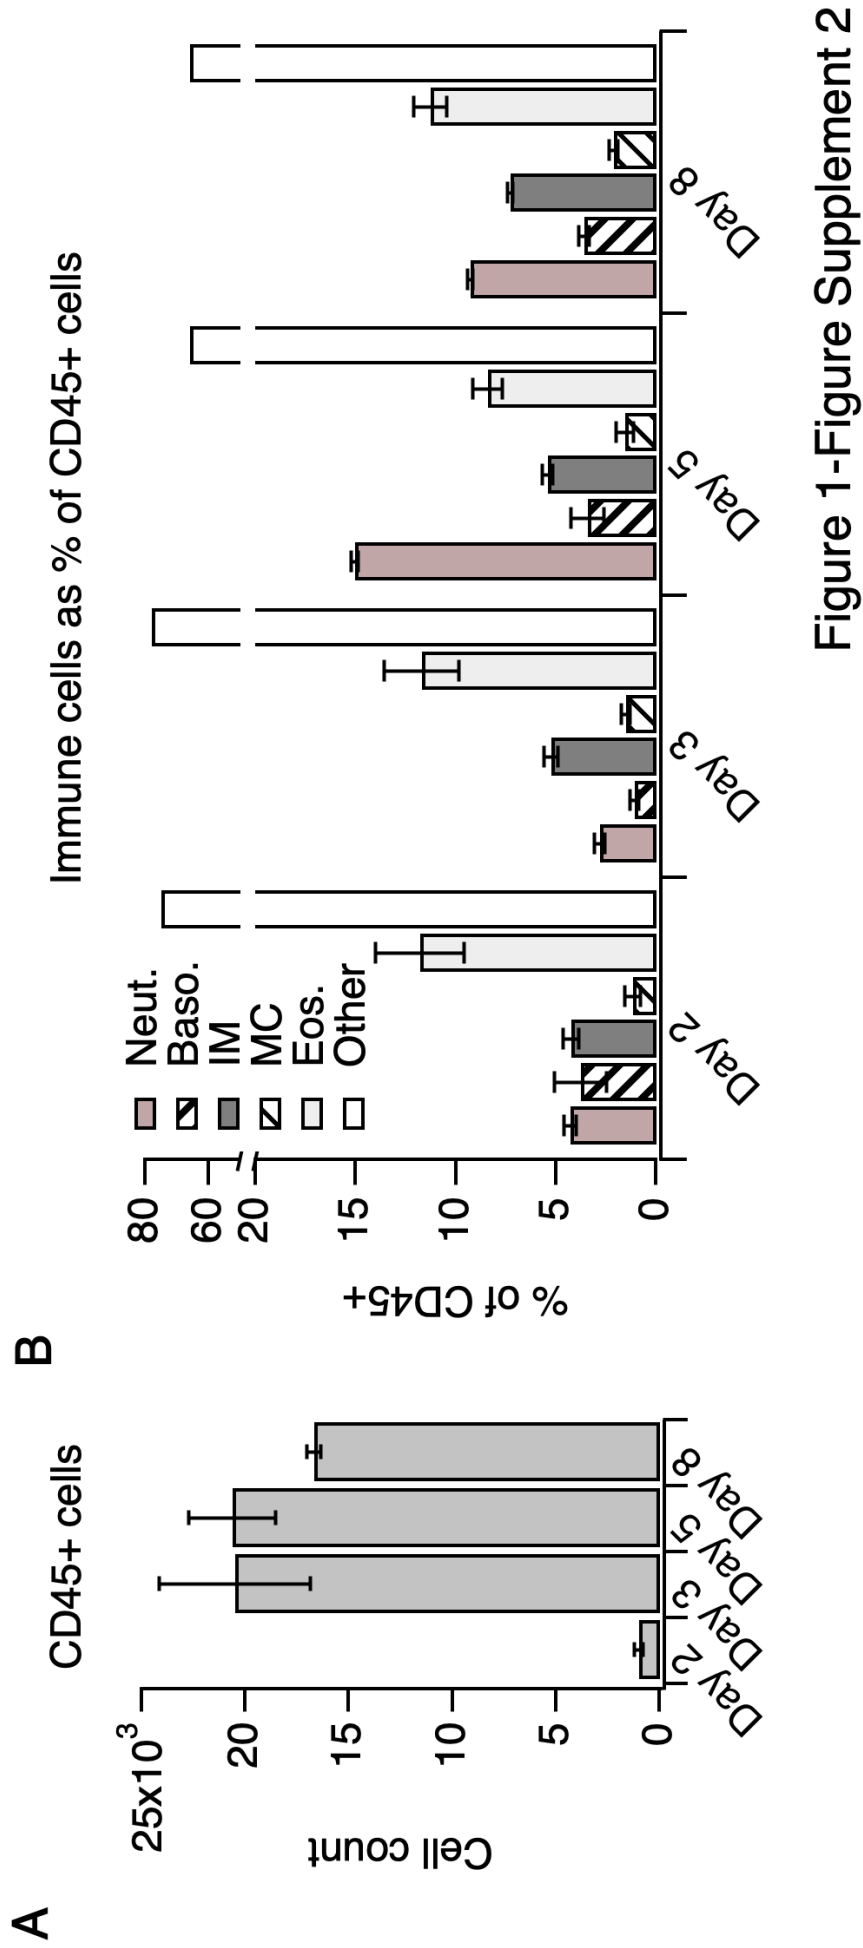

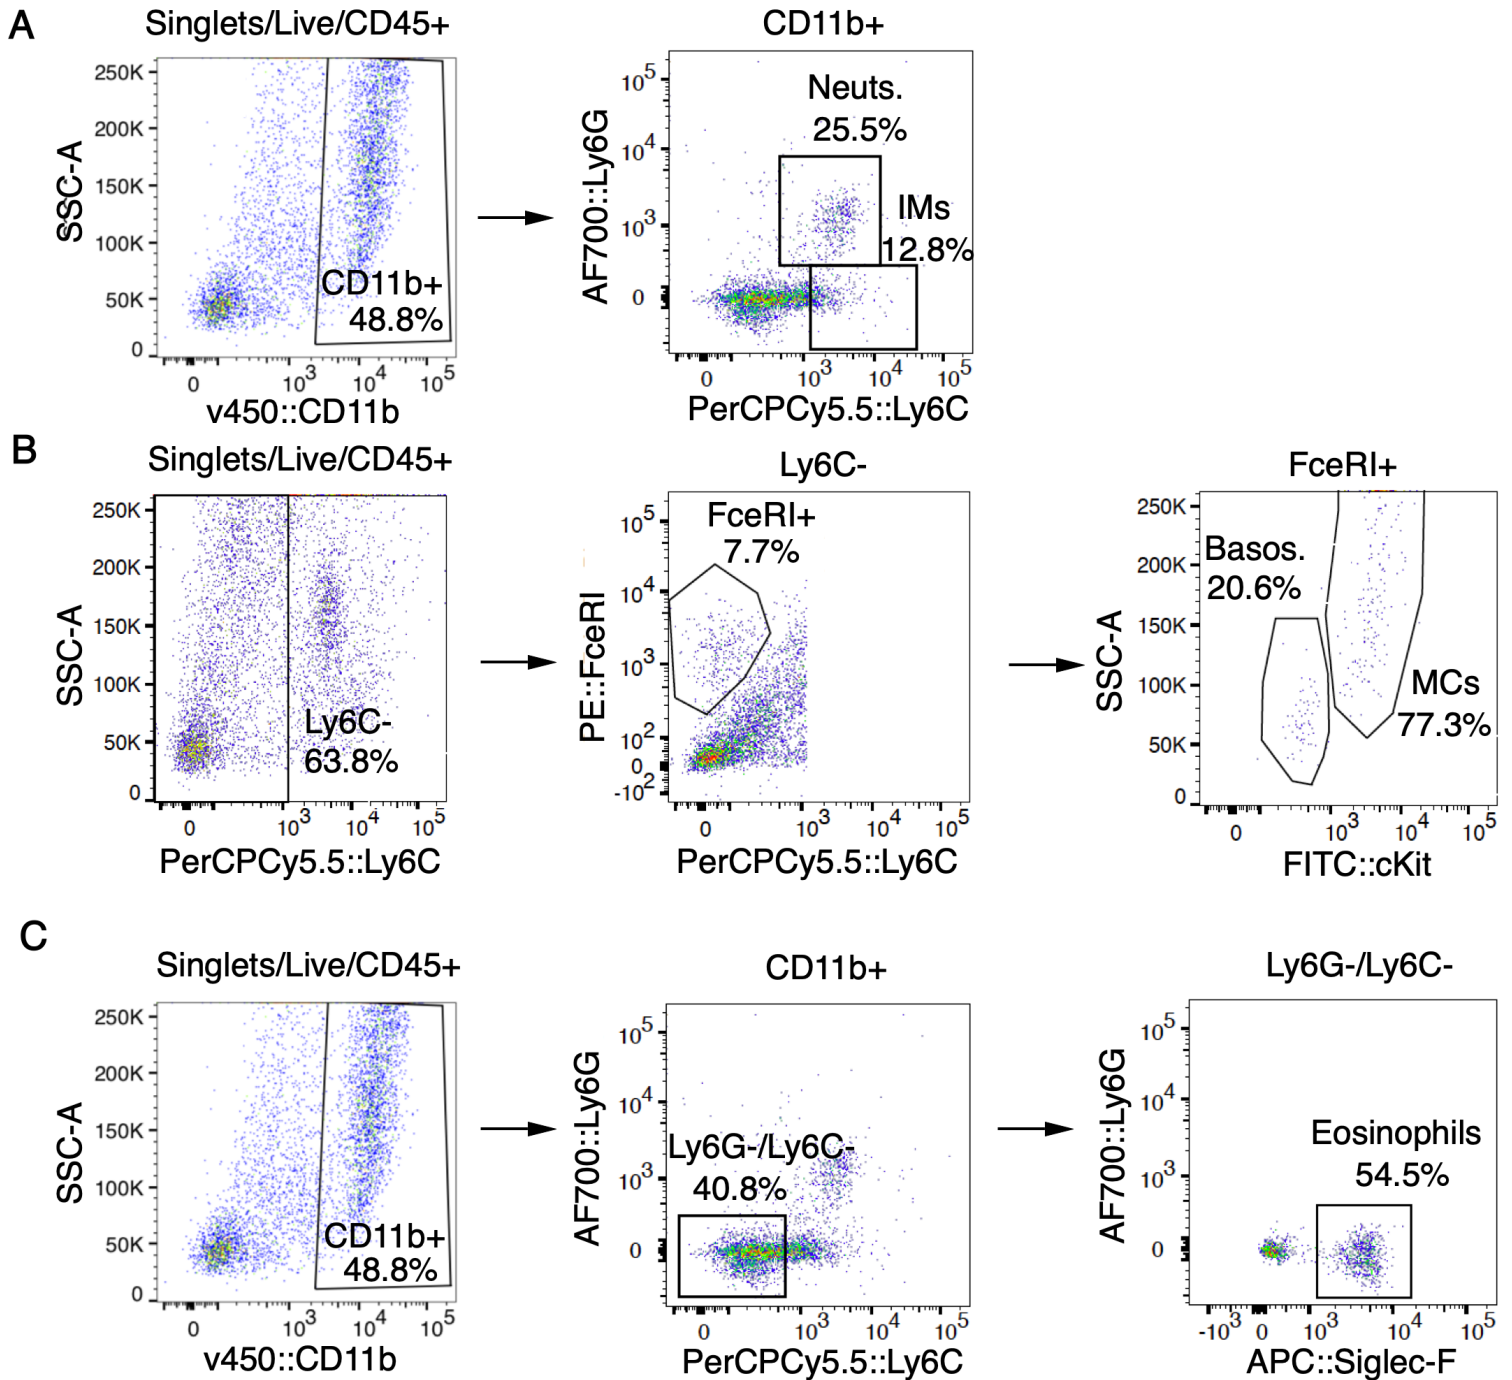

Figure 1-Figure Supplement 3



A

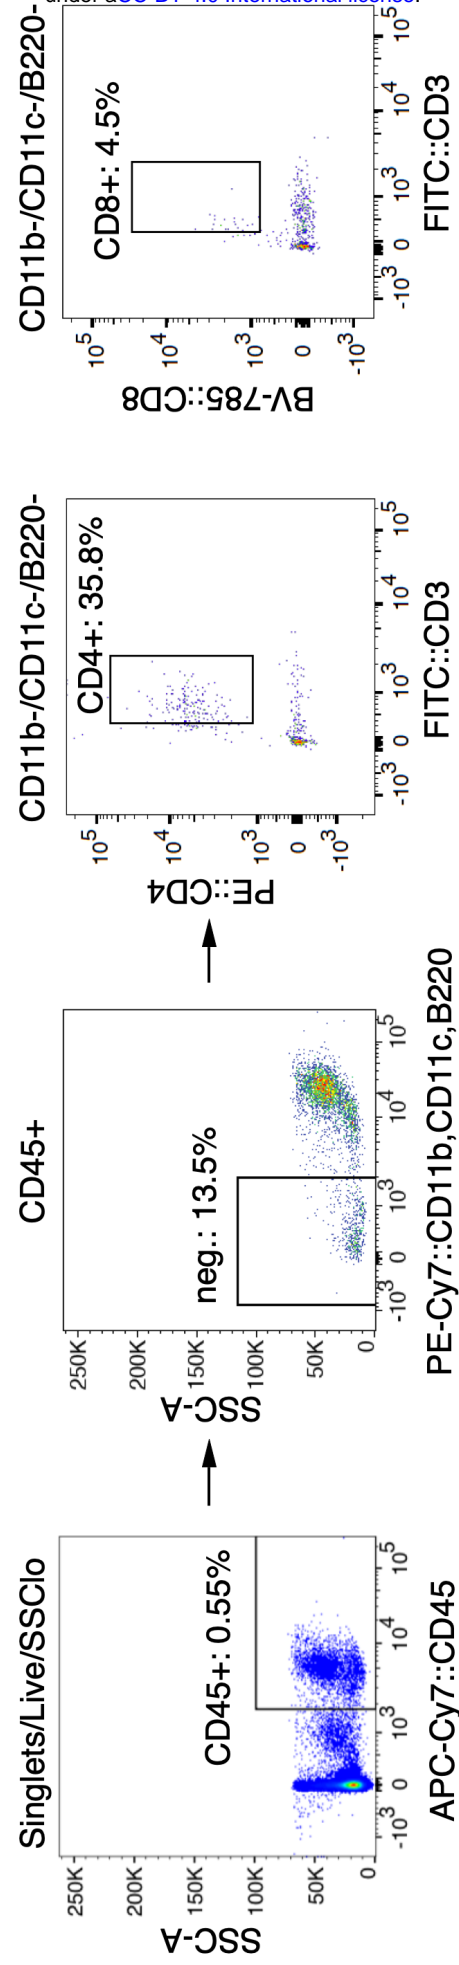

Figure 1-Figure Supplement 4

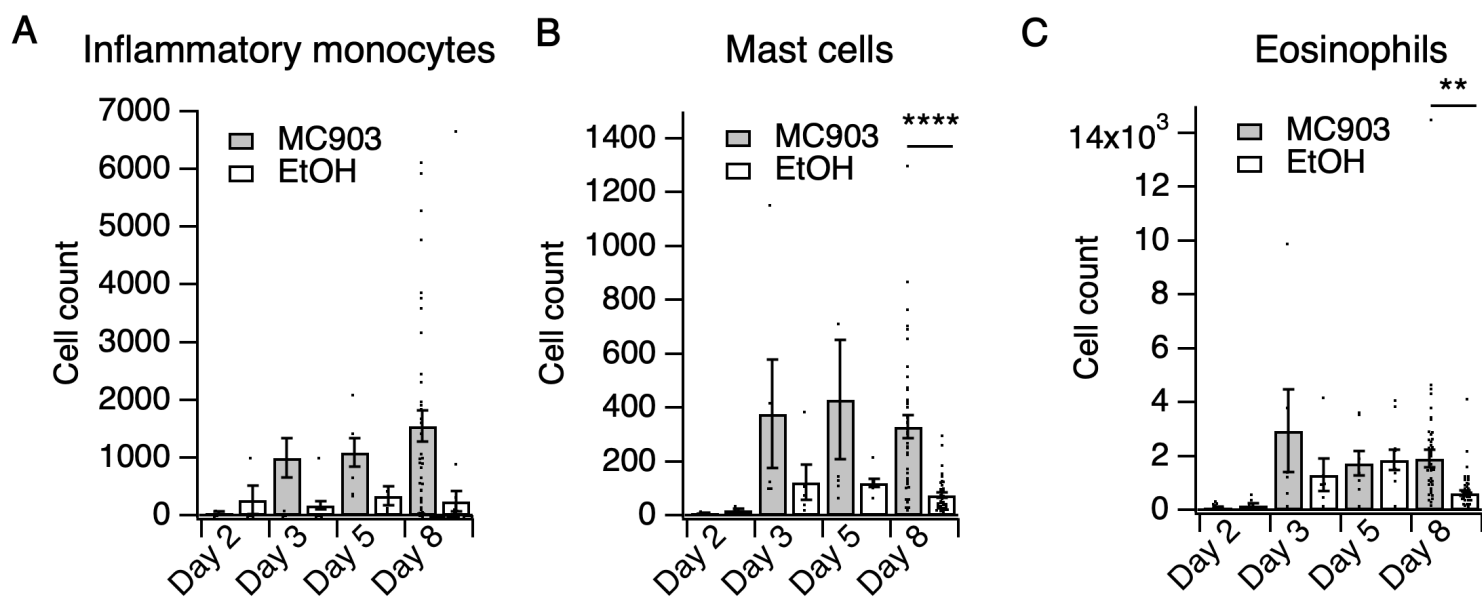

Figure 1-Figure Supplement 5

## A SLIGRL-treated human keratinocytes

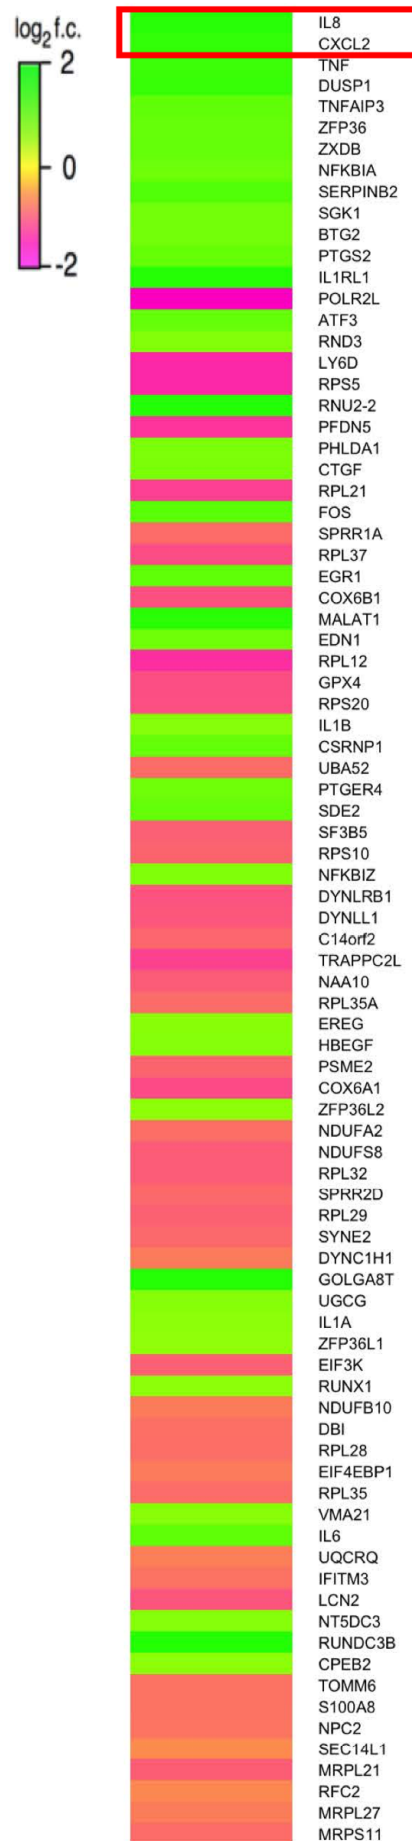

Figure 1-Figure Supplement 6

## A Neuronal genes in skin

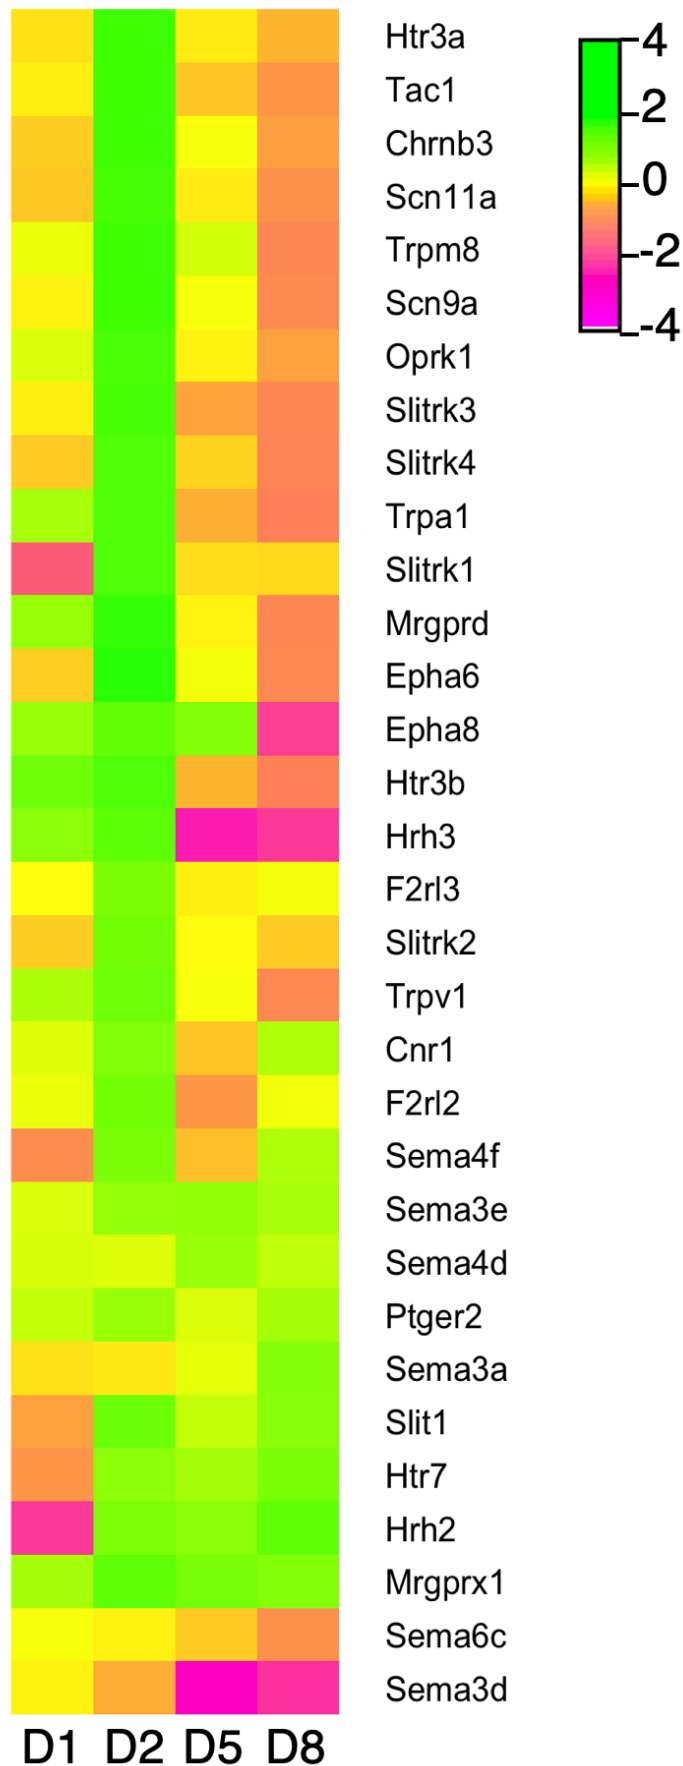

Figure 1-Figure Supplement 7

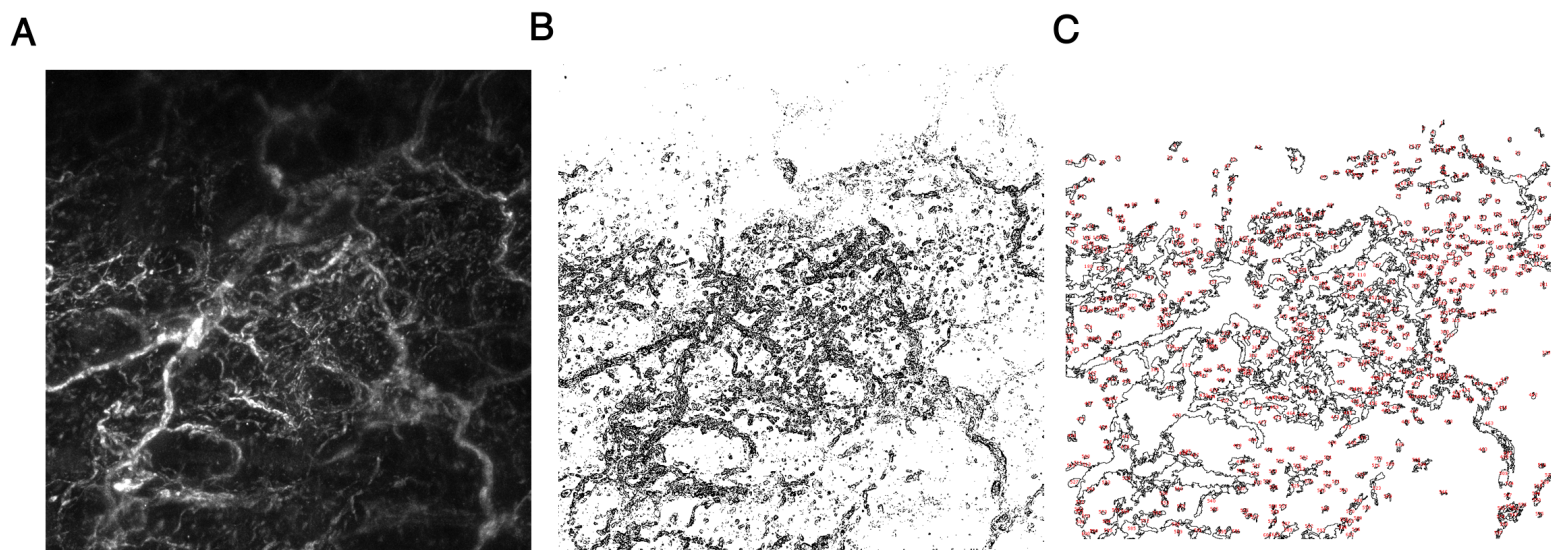

Figure 1-Figure Supplement 8

# A Day 2 CGRP innervation

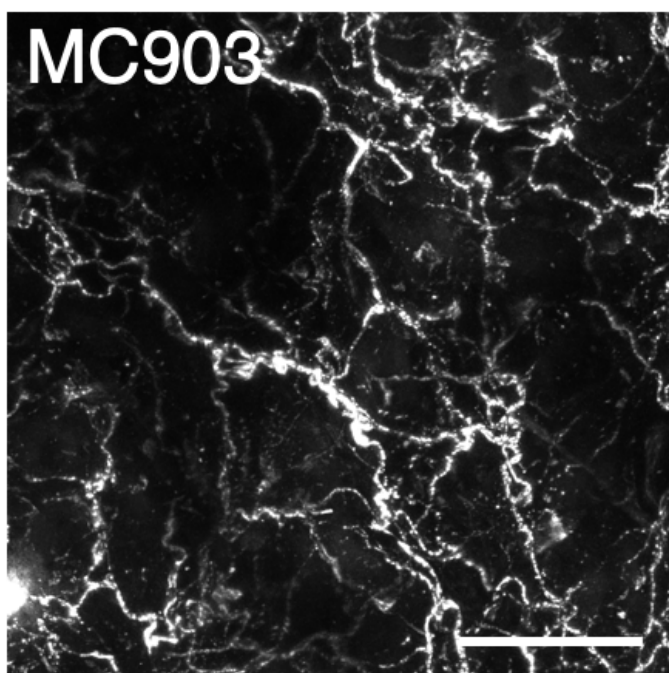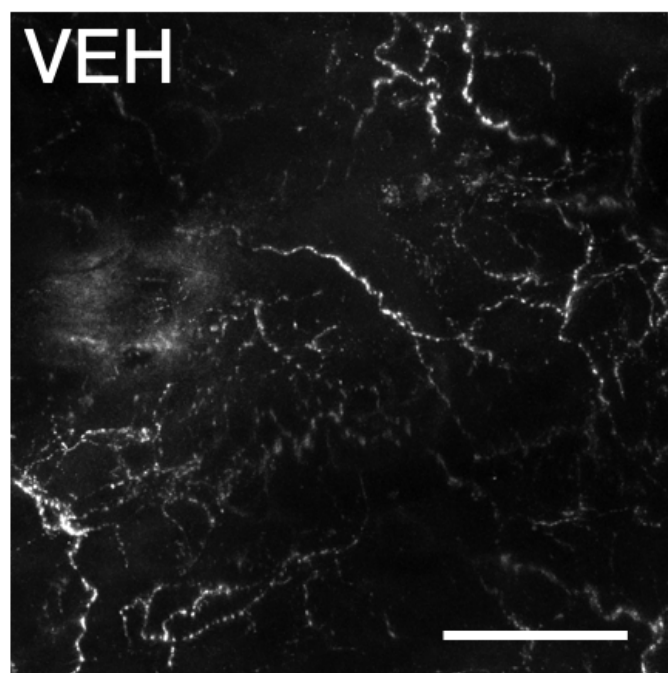

Figure 1-Figure Supplement 9

# A Lipid MS of skin

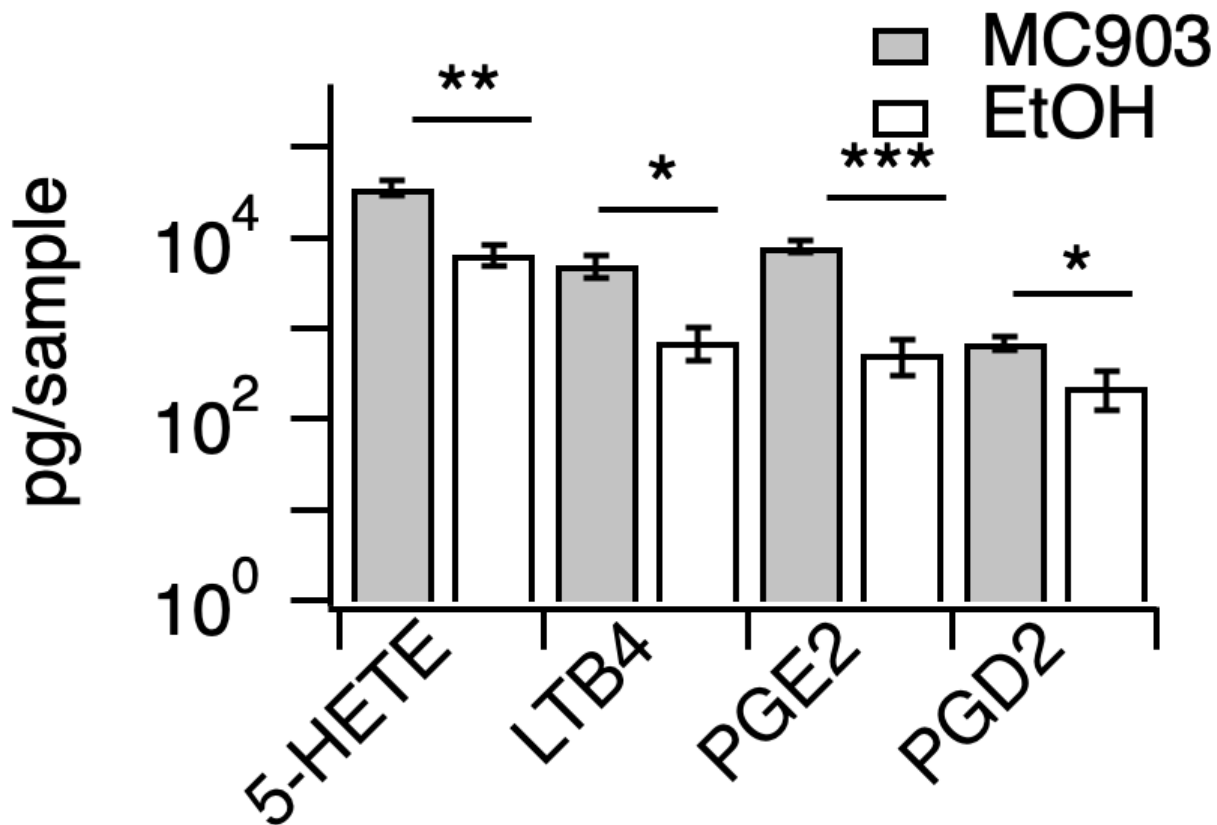

Figure 1-Figure Supplement 10

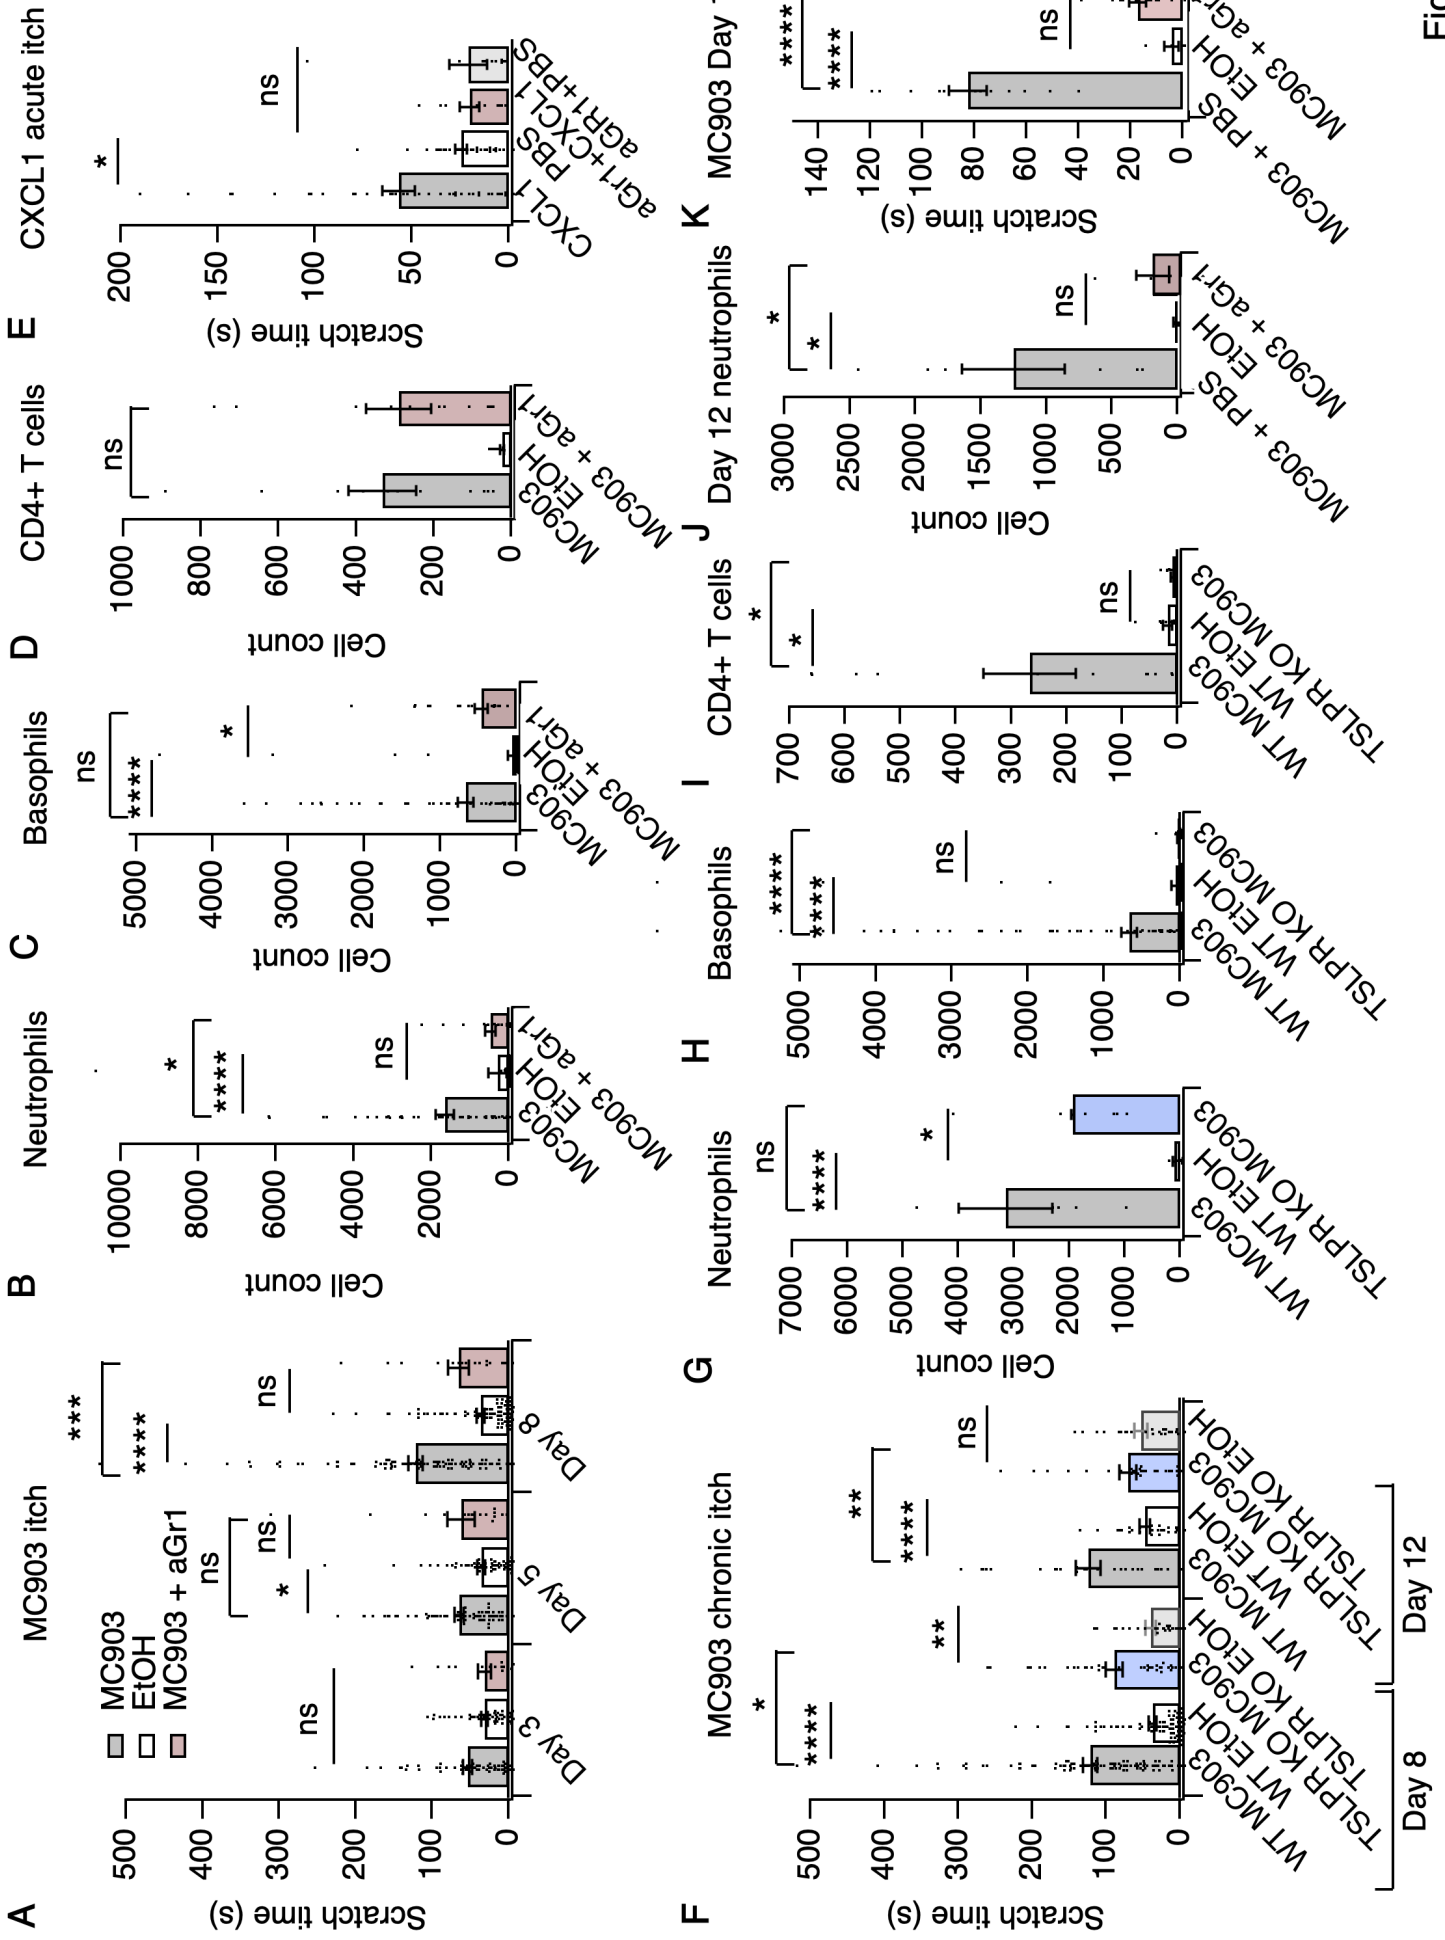

Figure 2



**A** Day 5

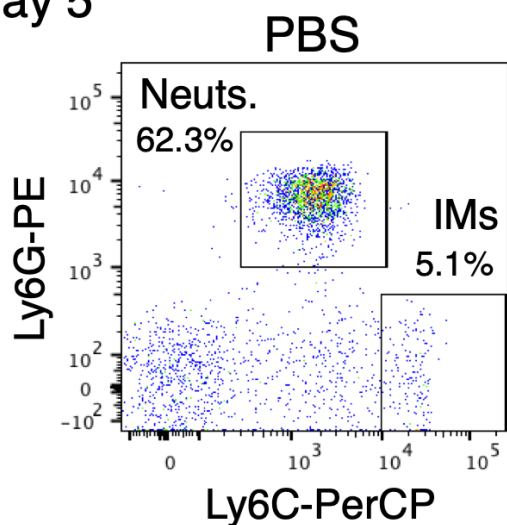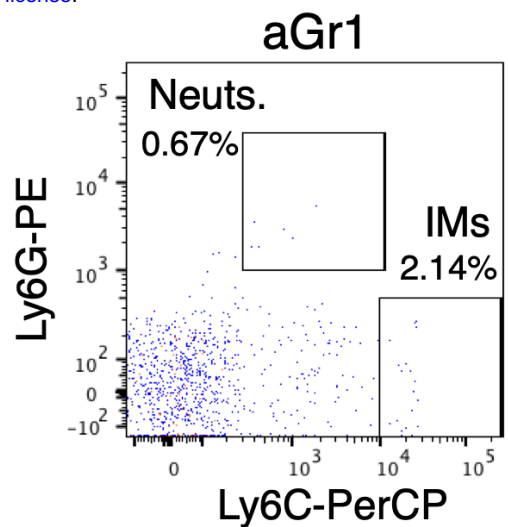

**B** Day 8

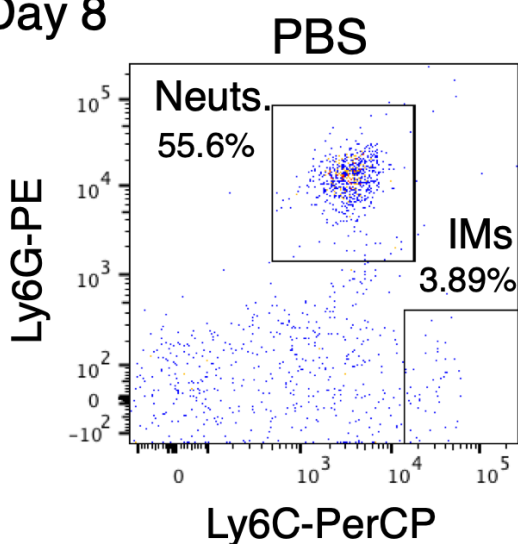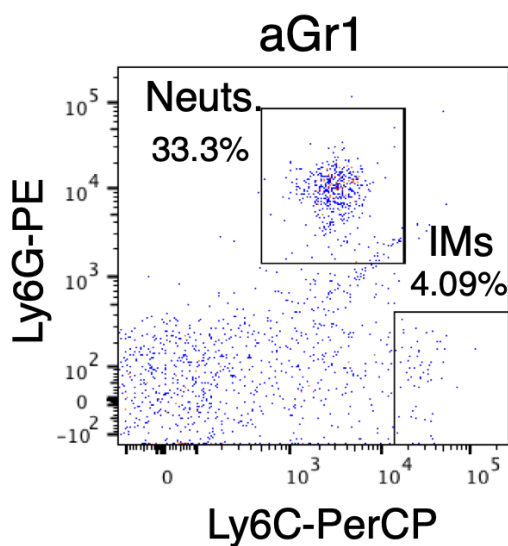

**C**

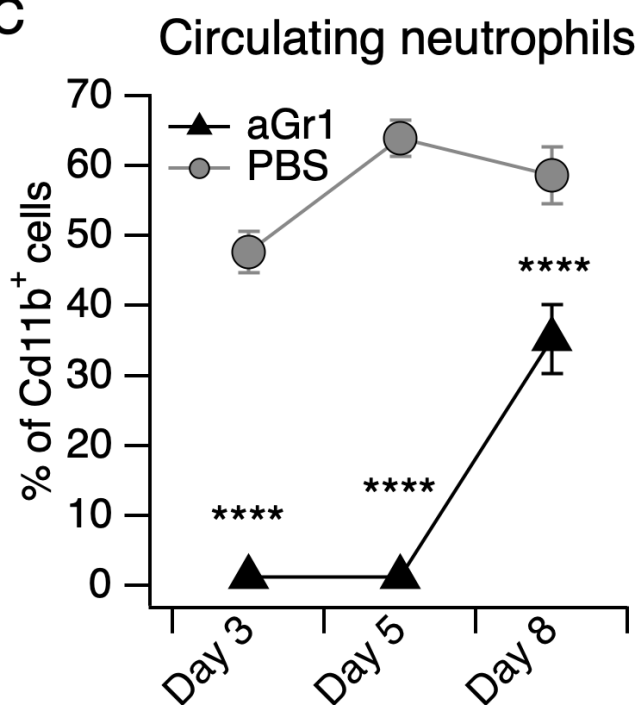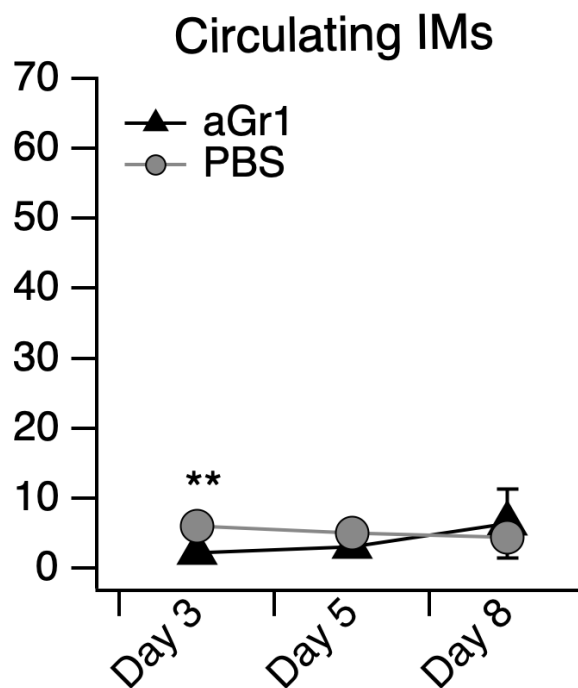

Figure 2-Figure Supplement 1

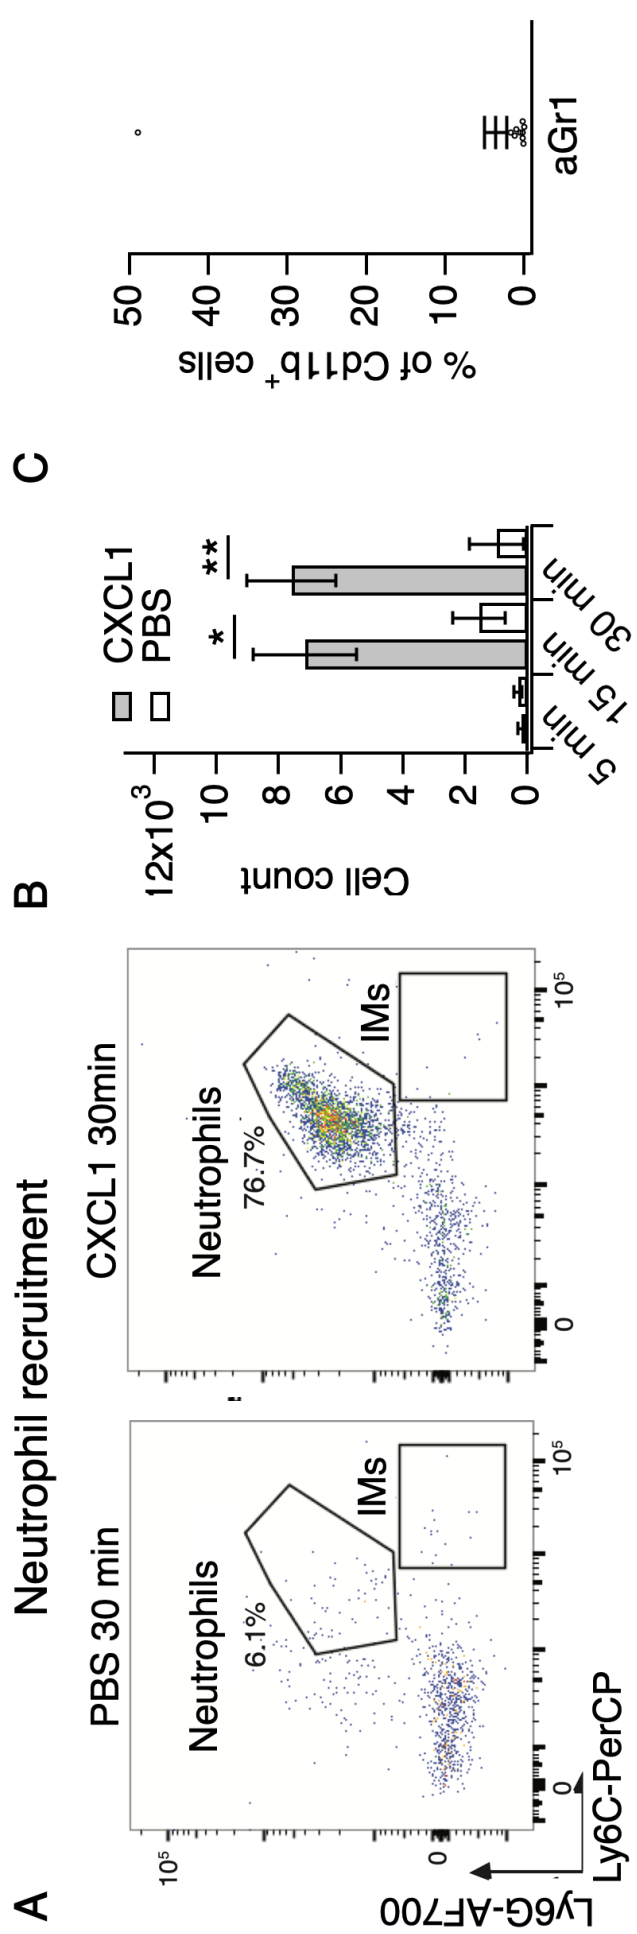

Figure 2-Figure Supplement 2

# A

## Chloroquine-evoked itch

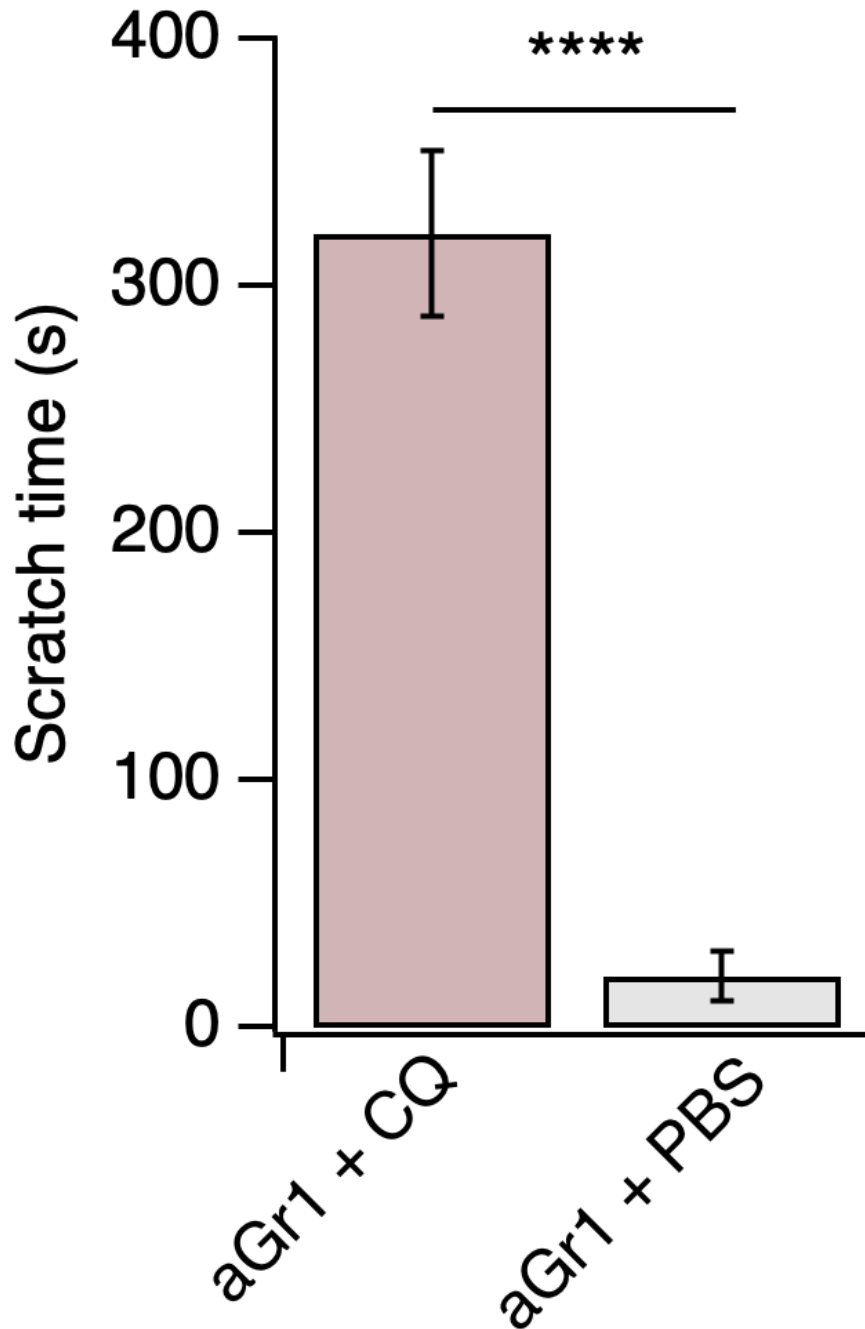

Figure 2-Figure Supplement 3

A

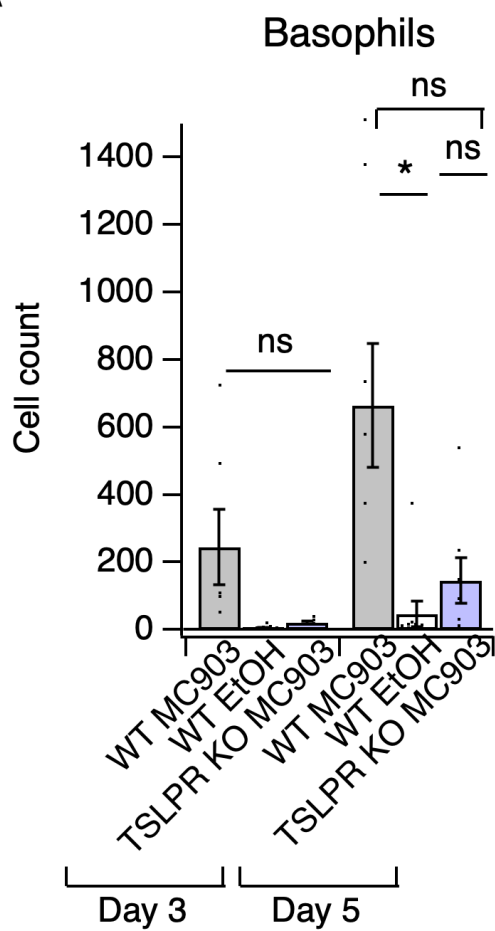

B

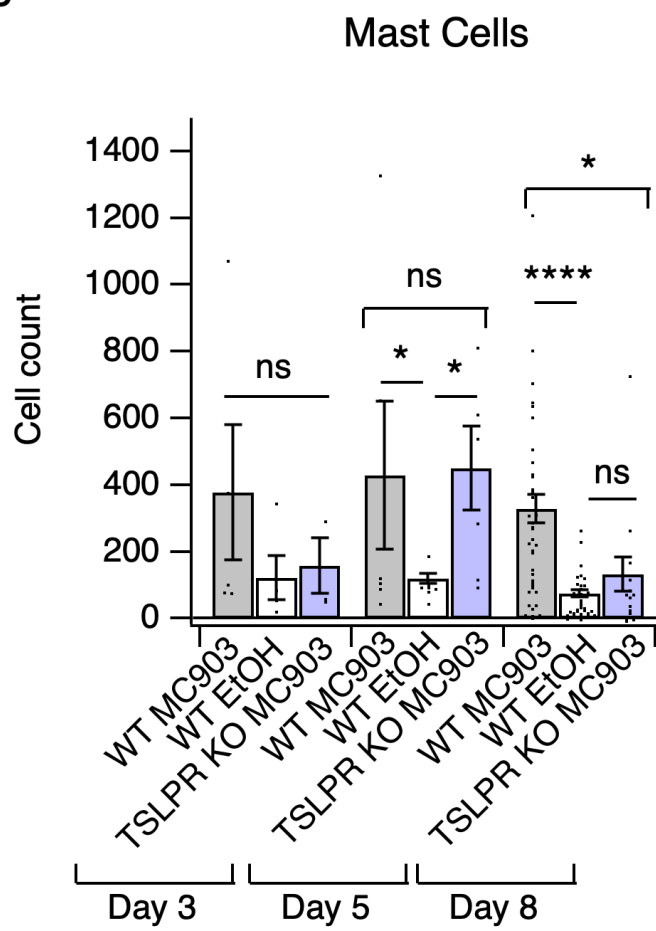

Figure 2-Figure Supplement 4

# A Neutrophil counts in ear skin

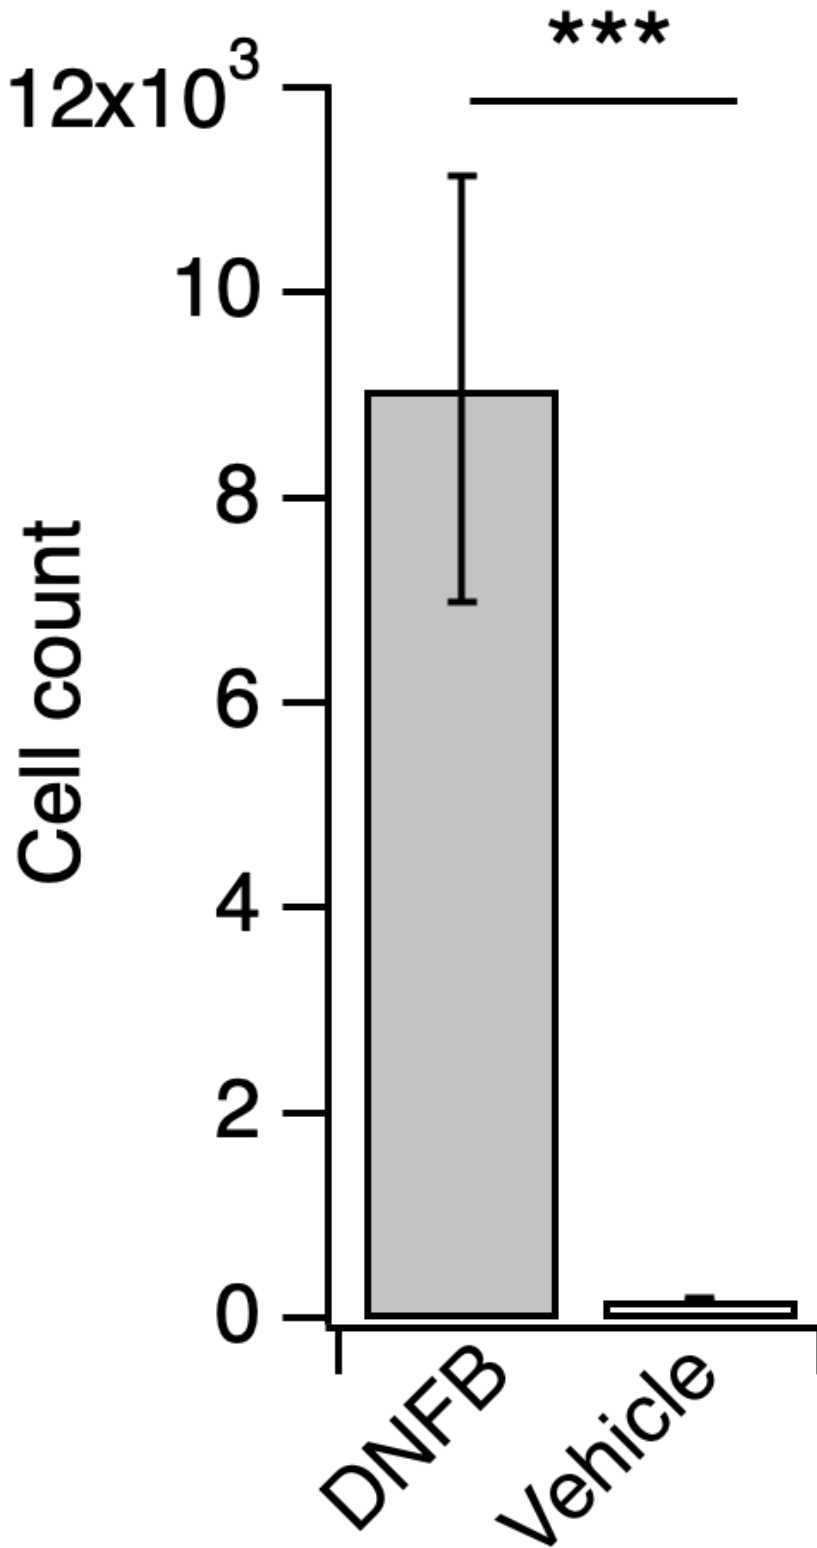

Figure 2-Figure Supplement 5

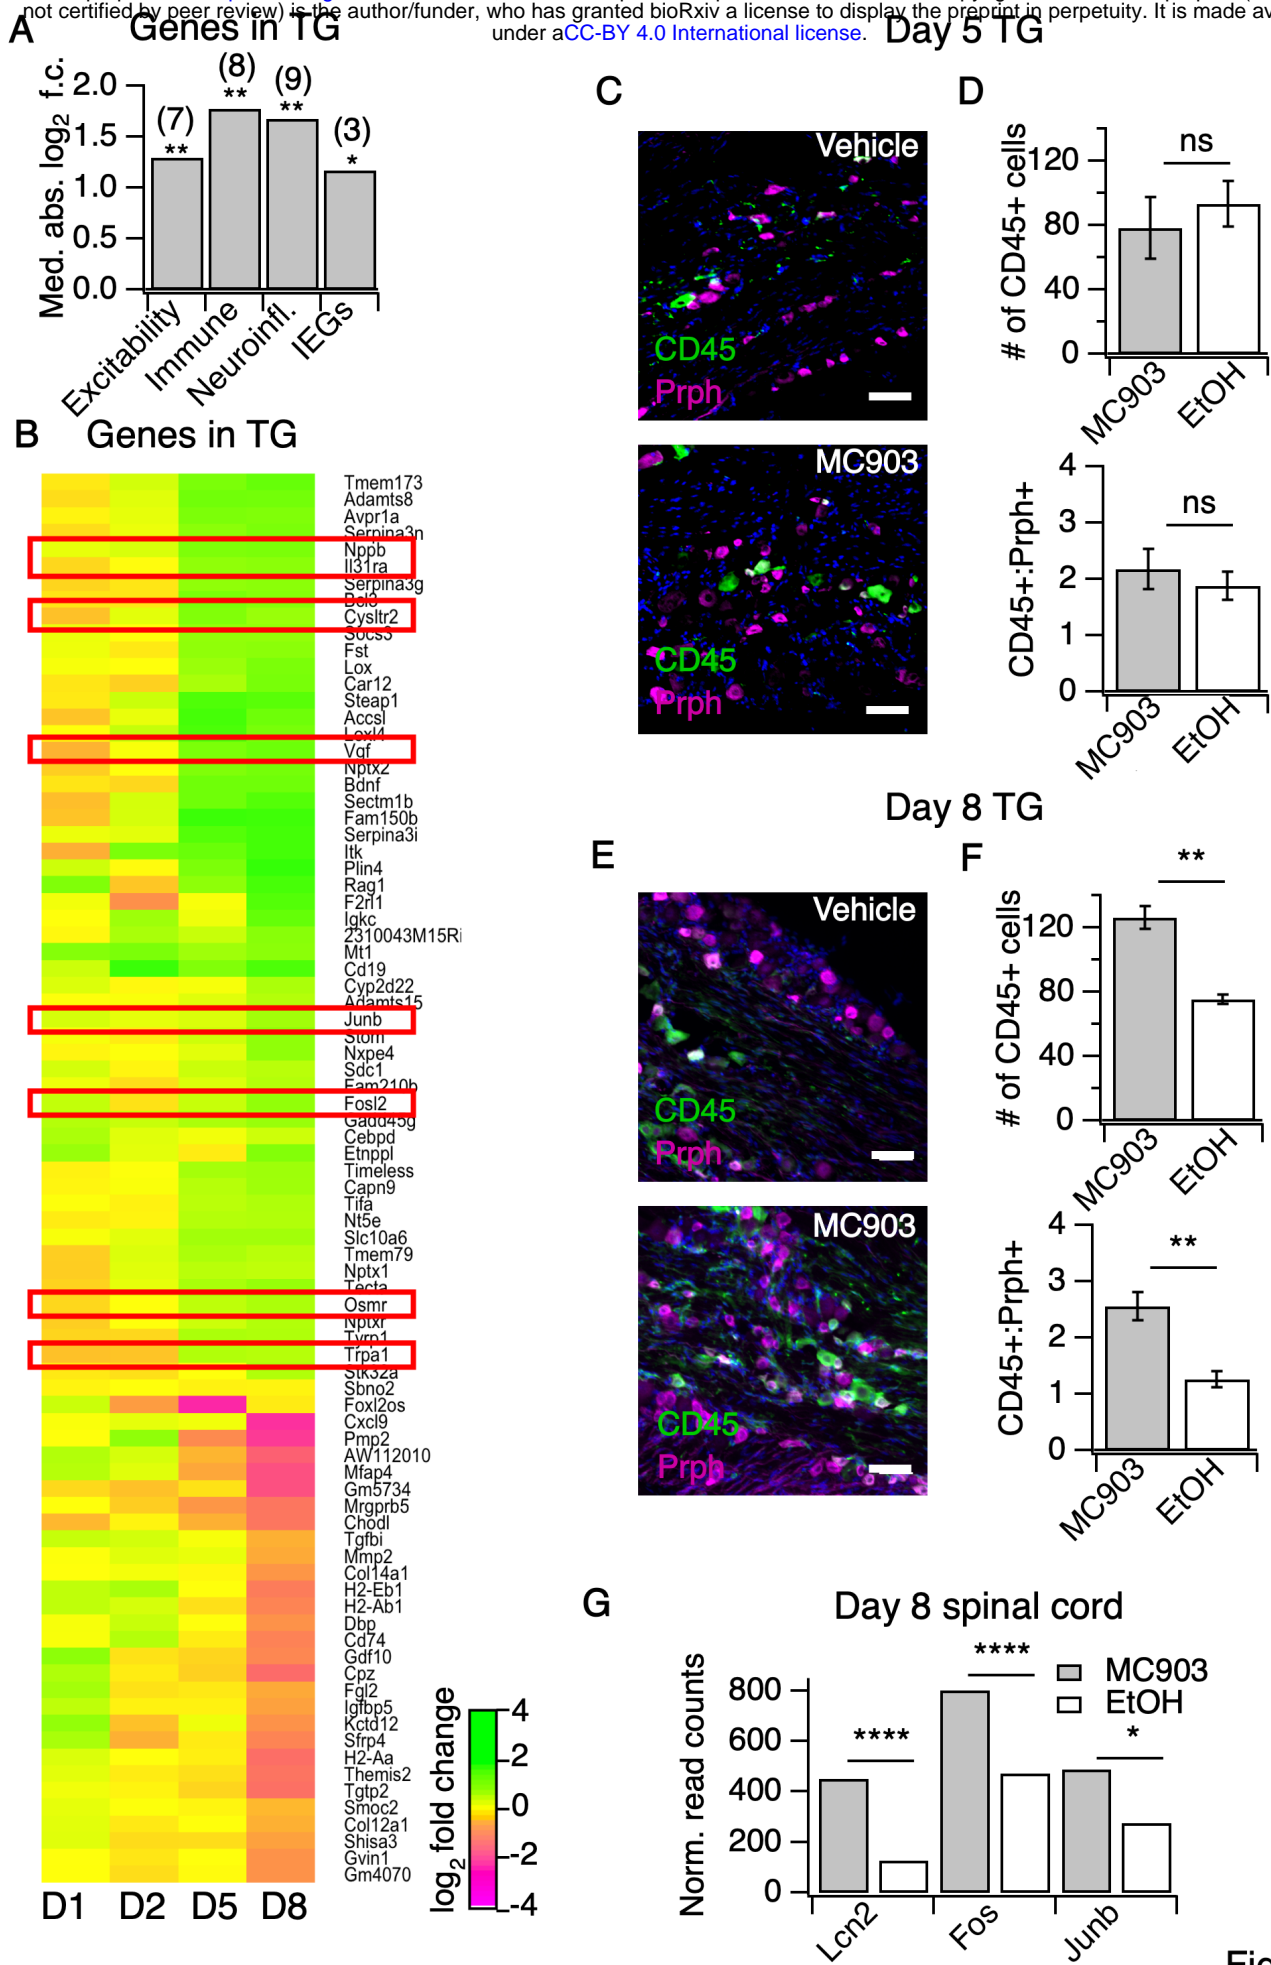

Figure 3

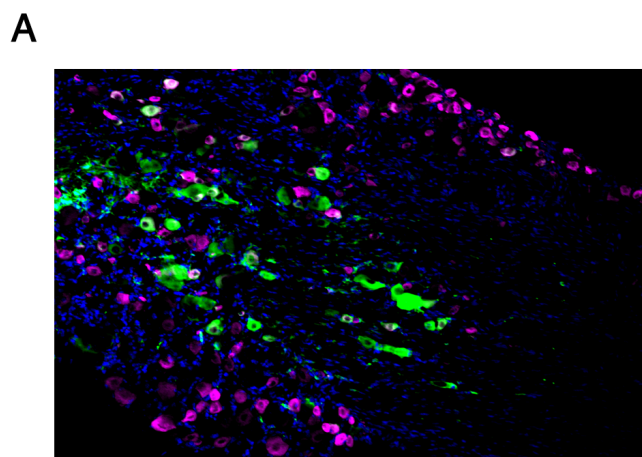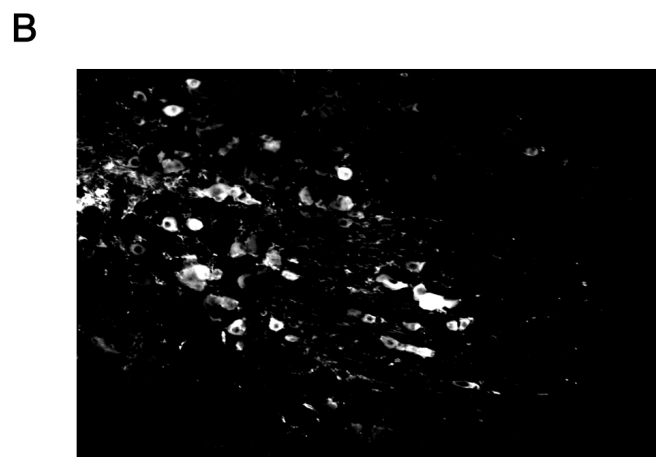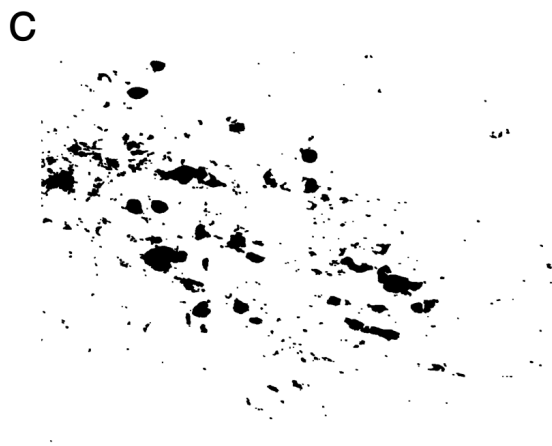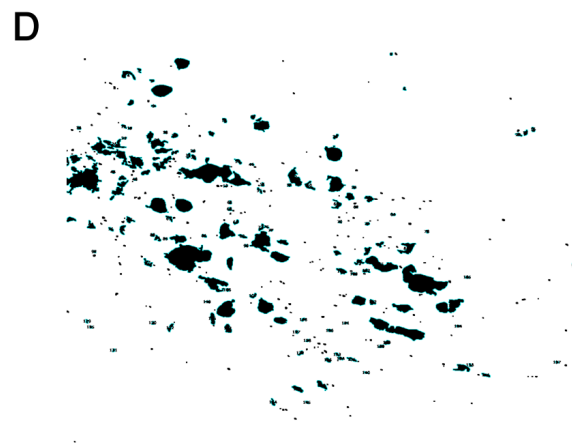

Figure 3-Figure Supplement 1

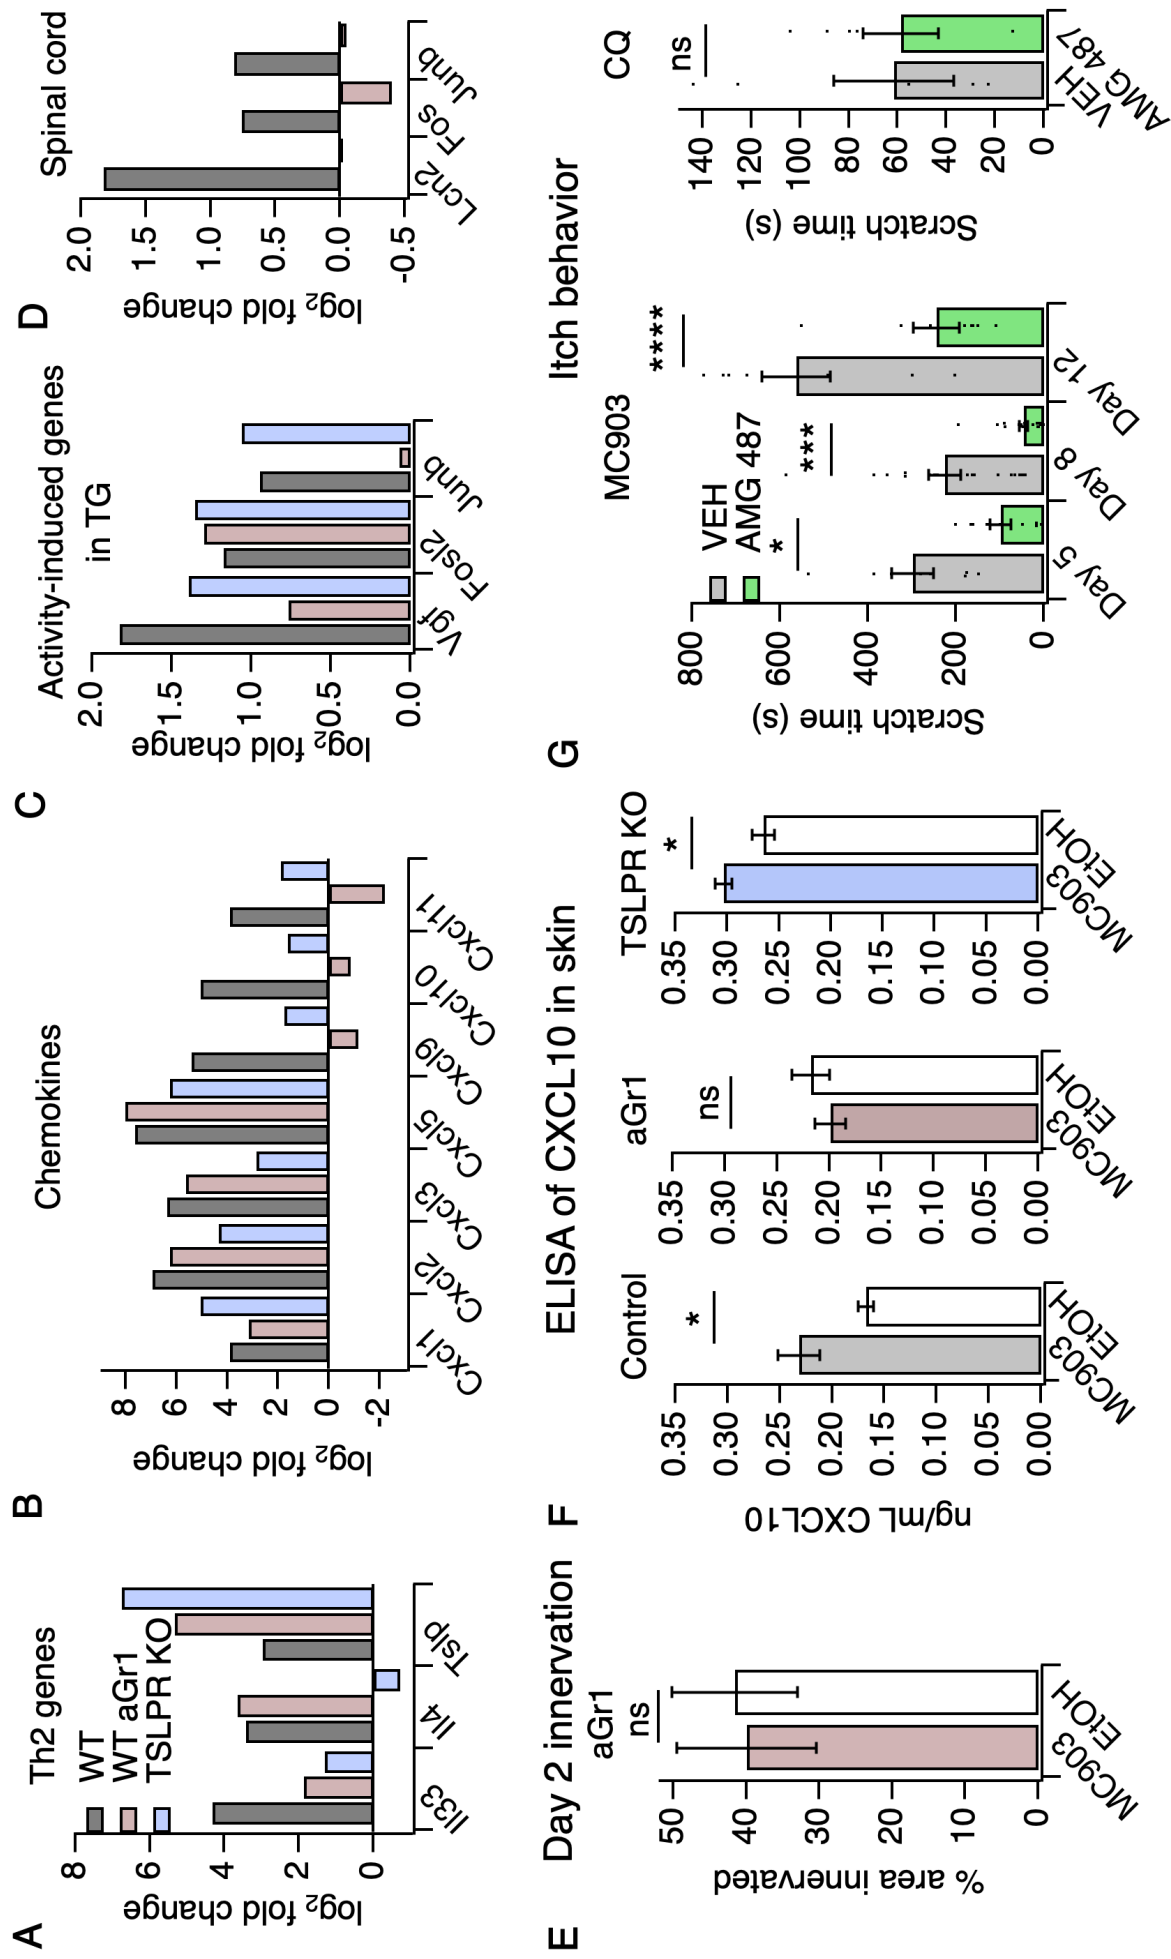

Figure 4



### A Itch genes

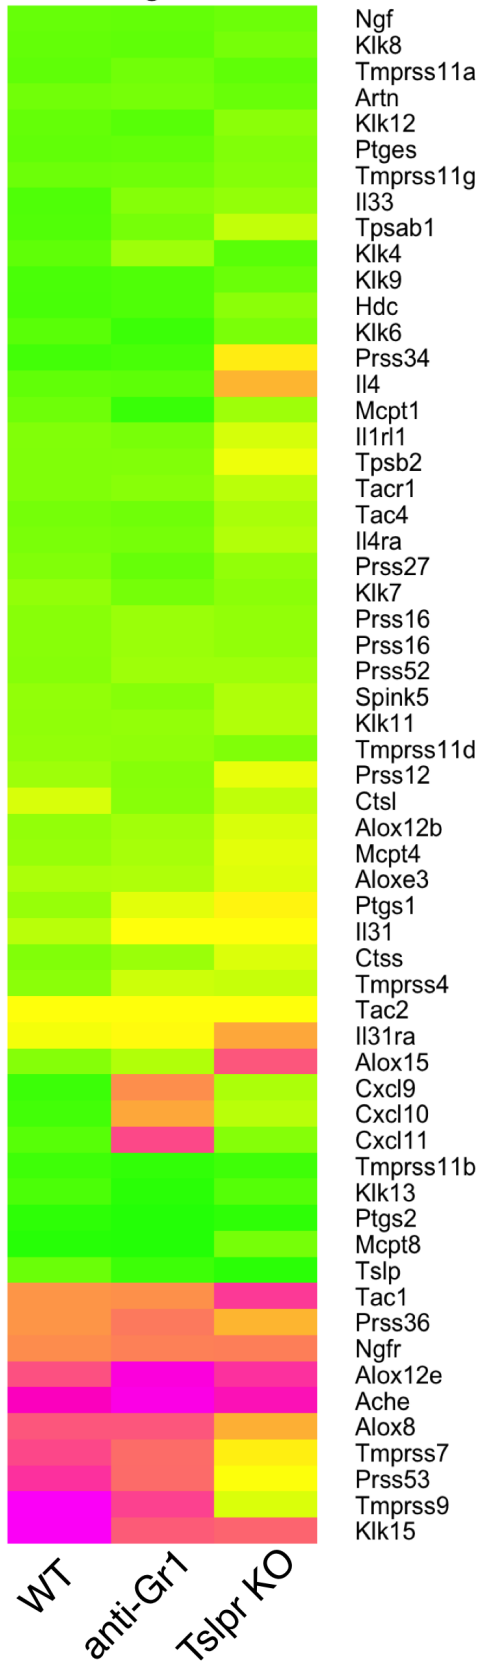

WT  
anti-Gr1  
Tslpr KO

### B Genes in TG

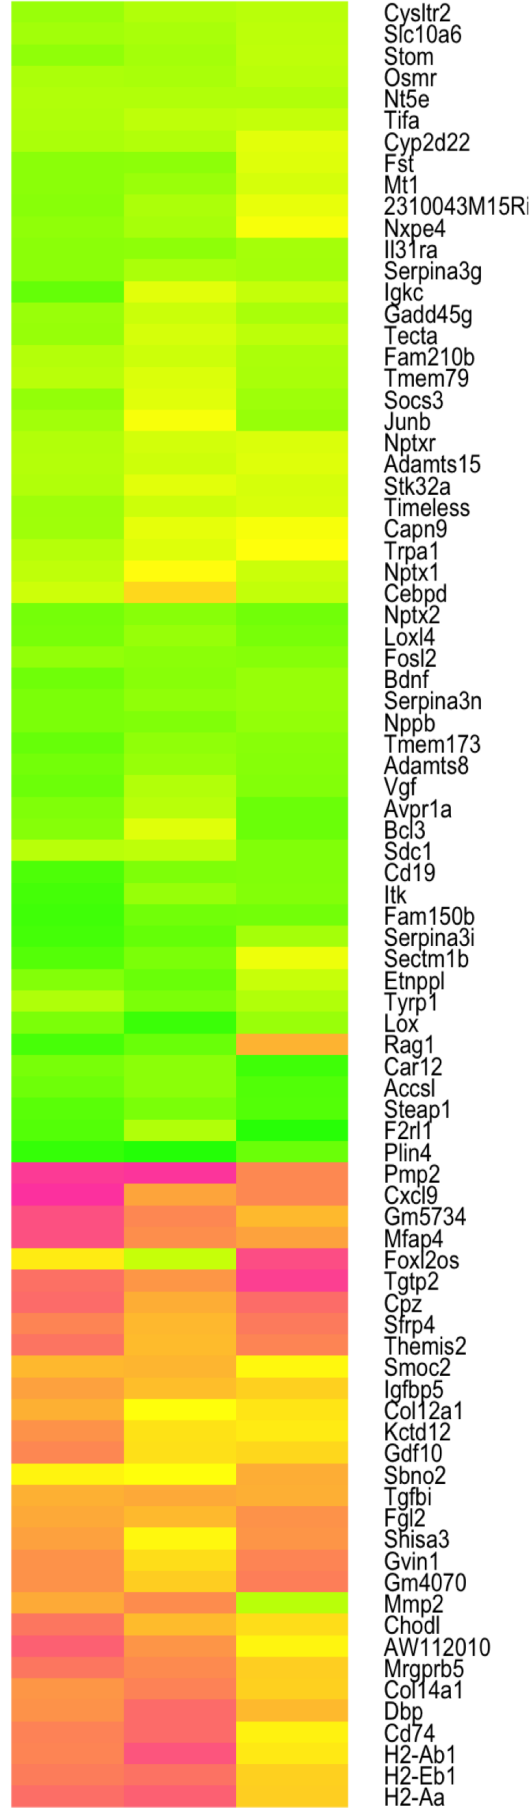

WT  
anti-Gr1  
Tslpr KO

log<sub>2</sub> fold change  
4  
2  
0  
-2  
-4

Figure 4-Figure Supplement 1

A

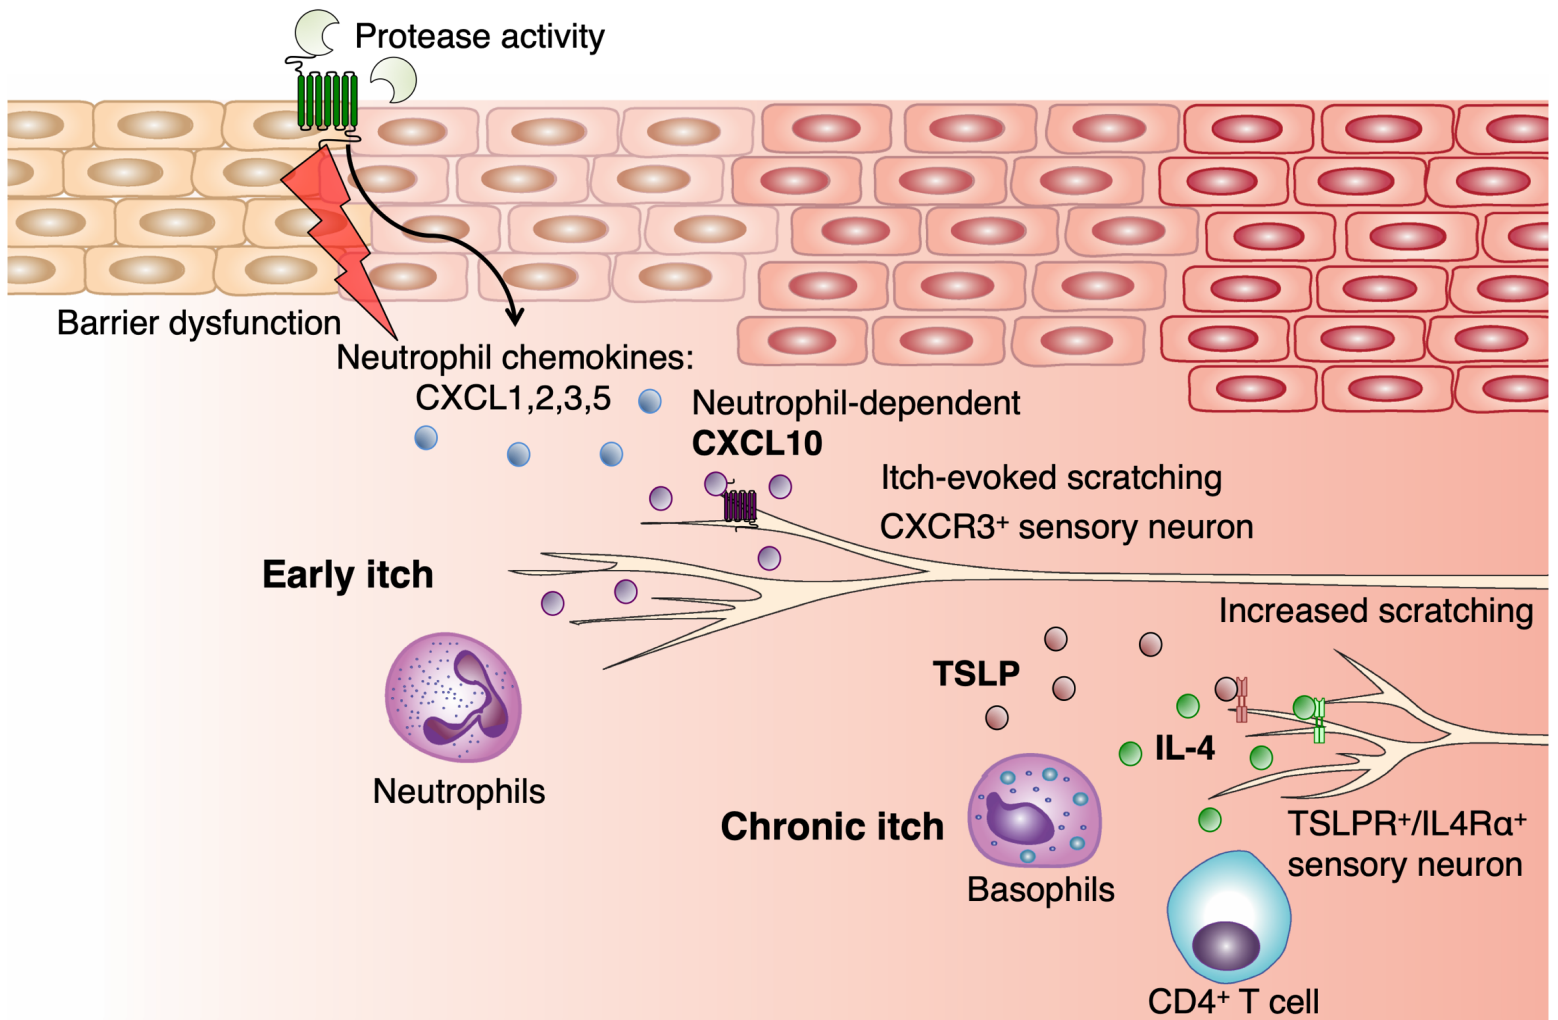

Figure 5
